# Supplementary material for: Base-promoted lipase-catalyzed kinetic resolution of atropisomeric 1,1′-biaryl-2,2′-diols
Source: Royal Society of Chemistry journal article supplement (doi:10.1039/c8ra09070j), 2019-01-01
Supplement: c8ra09070j1.pdf [file c8ra09070j1.pdf]

**Supporting Information for:**

**Base-promoted lipase-catalyzed kinetic resolution of atropisomeric  
1,1'-biaryl-2,2'-diols**

Gamal A. I. Moustafa,<sup>a,b</sup> Kengo Kasama,<sup>a</sup> Koichi Higashio,<sup>a</sup> and Shuji Akai\*<sup>a</sup>

<sup>a</sup>Graduate School of Pharmaceutical Sciences, Osaka University, 1-6 Yamadaoka, Suita, Osaka 565-0871, Japan.

<sup>b</sup>Department of Medicinal Chemistry, Faculty of Pharmacy, Minia University, Minia 61519, Egypt.

E-mail: akai@phs.osaka-u.ac.jp.

**Contents**

NMR spectra and HPLC charts of racemic and enantioenriched compounds.....S2-S59

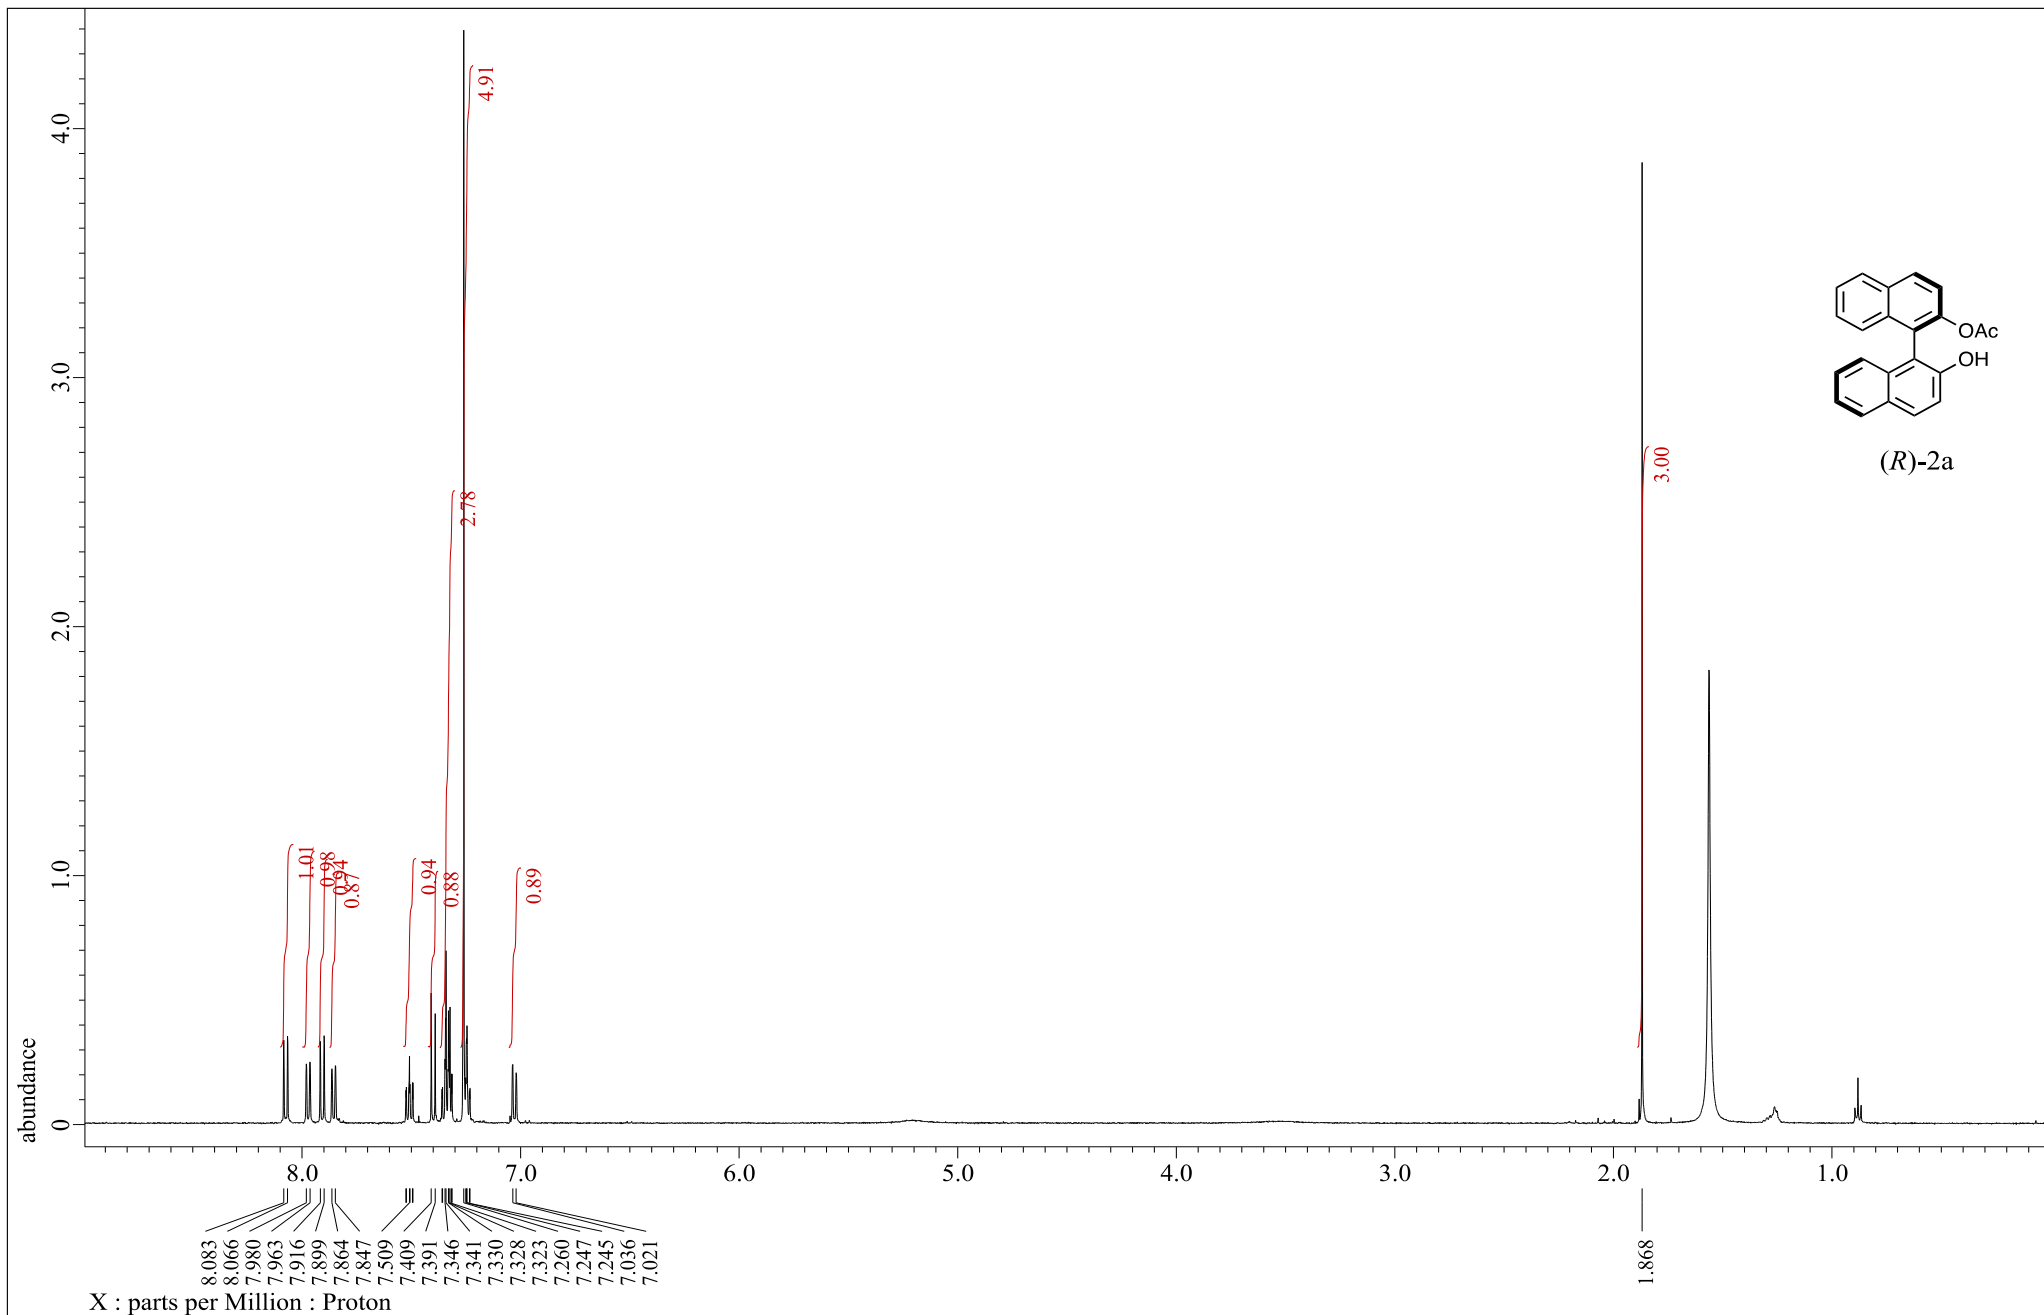

<sup>1</sup>H NMR spectrum (500 MHz, CDCl<sub>3</sub>) of (R)-2a

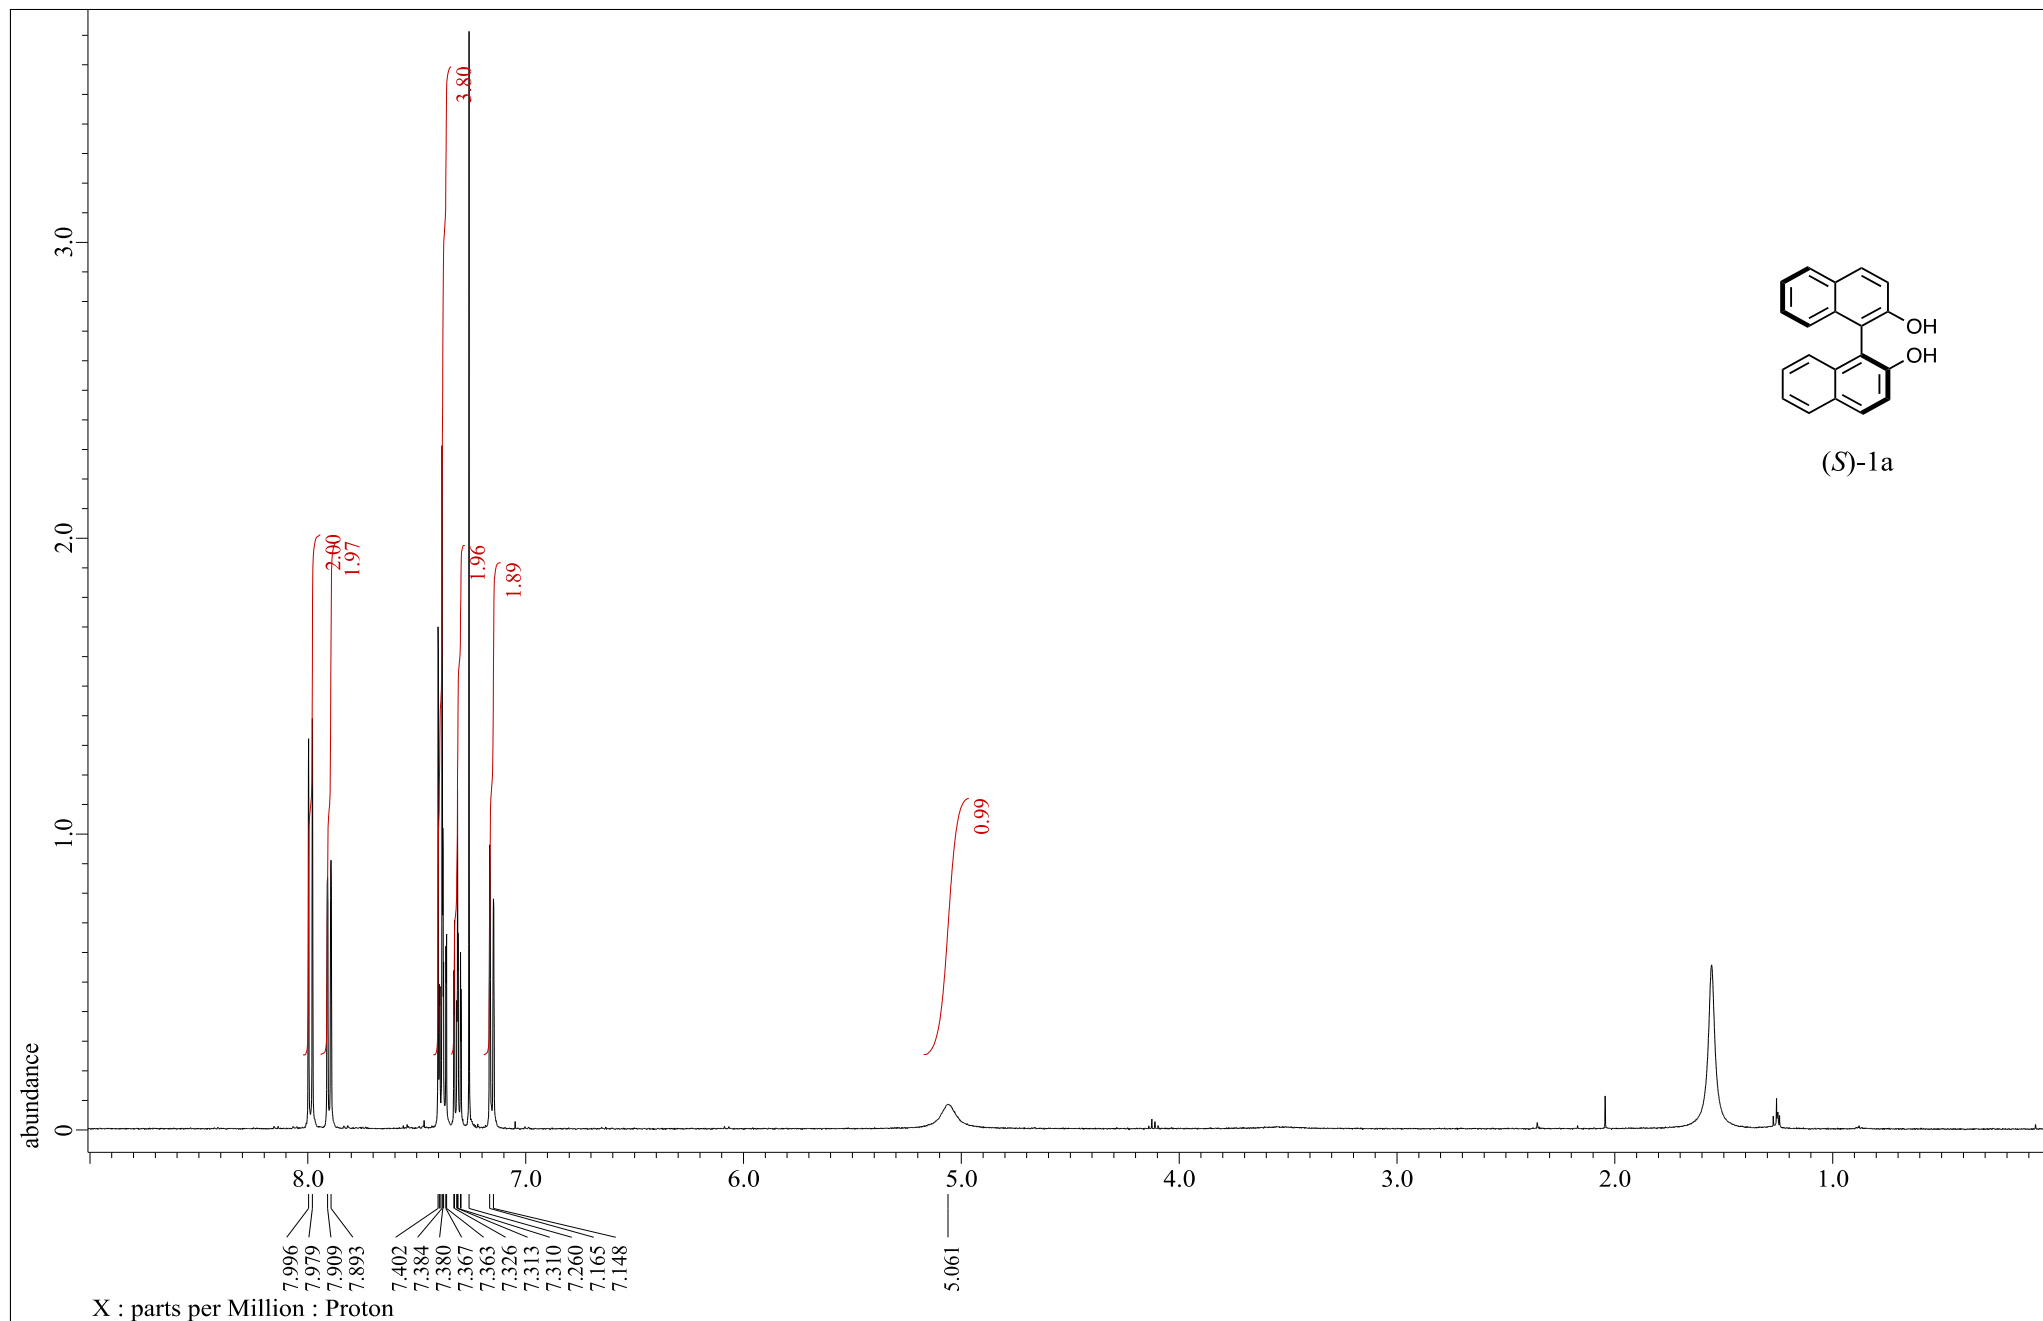

<sup>1</sup>H NMR spectrum (500 MHz, CDCl<sub>3</sub>) of (S)-1a

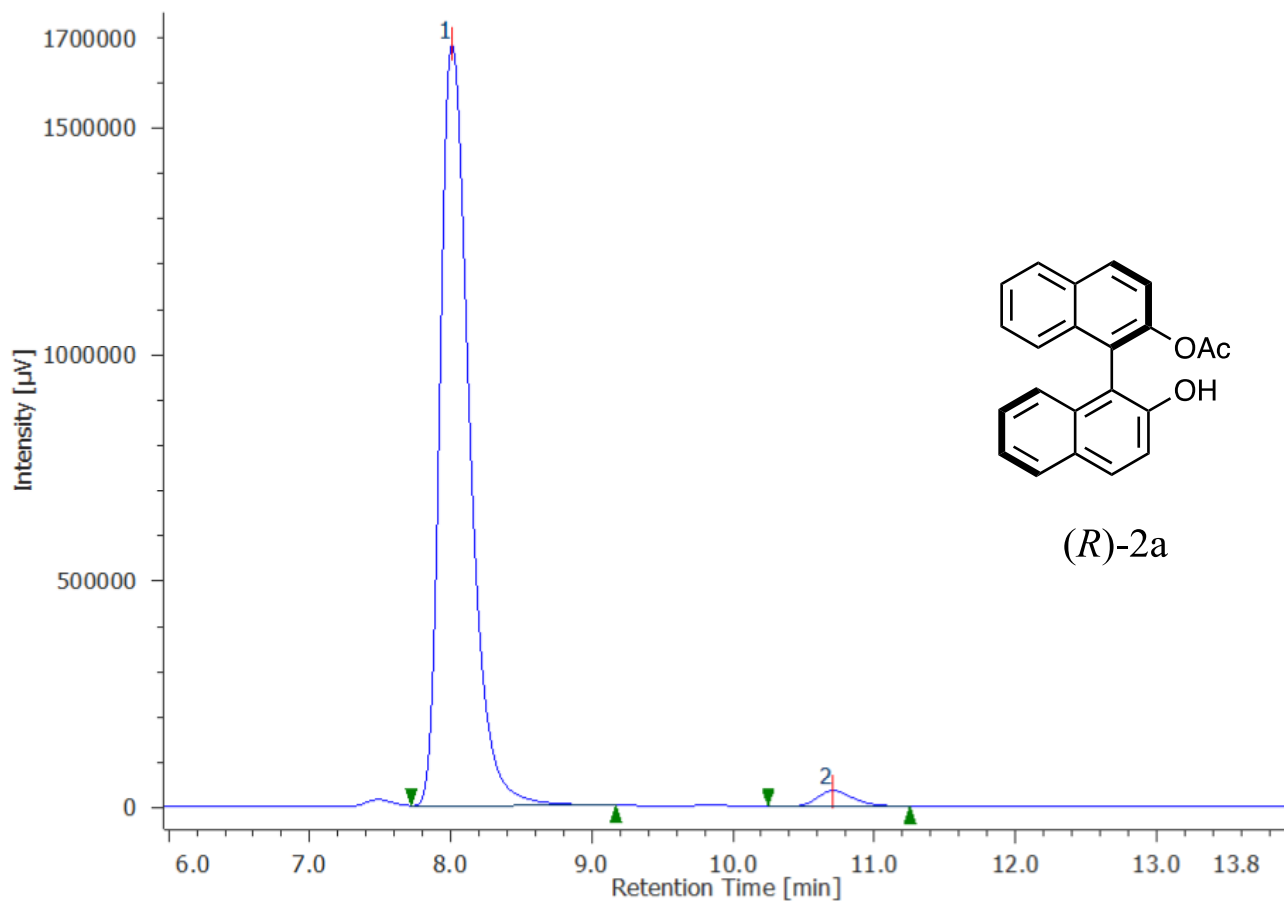

| # | ピーク名    | CH | tR [min] | 面積 [μV·sec] | 高さ [μV] | 面積%    | 高さ%    | 定量値 | NTP  | 分離度   | シンメトリー係数 | 警告 |
|---|---------|----|----------|-------------|---------|--------|--------|-----|------|-------|----------|----|
| 1 | Unknown | 9  | 8.010    | 24409638    | 1682764 | 97.585 | 98.001 | N/A | 7577 | 6.583 | 1.402    |    |
| 2 | Unknown | 9  | 10.710   | 604182      | 34328   | 2.415  | 1.999  | N/A | 8887 | N/A   | 1.251    |    |

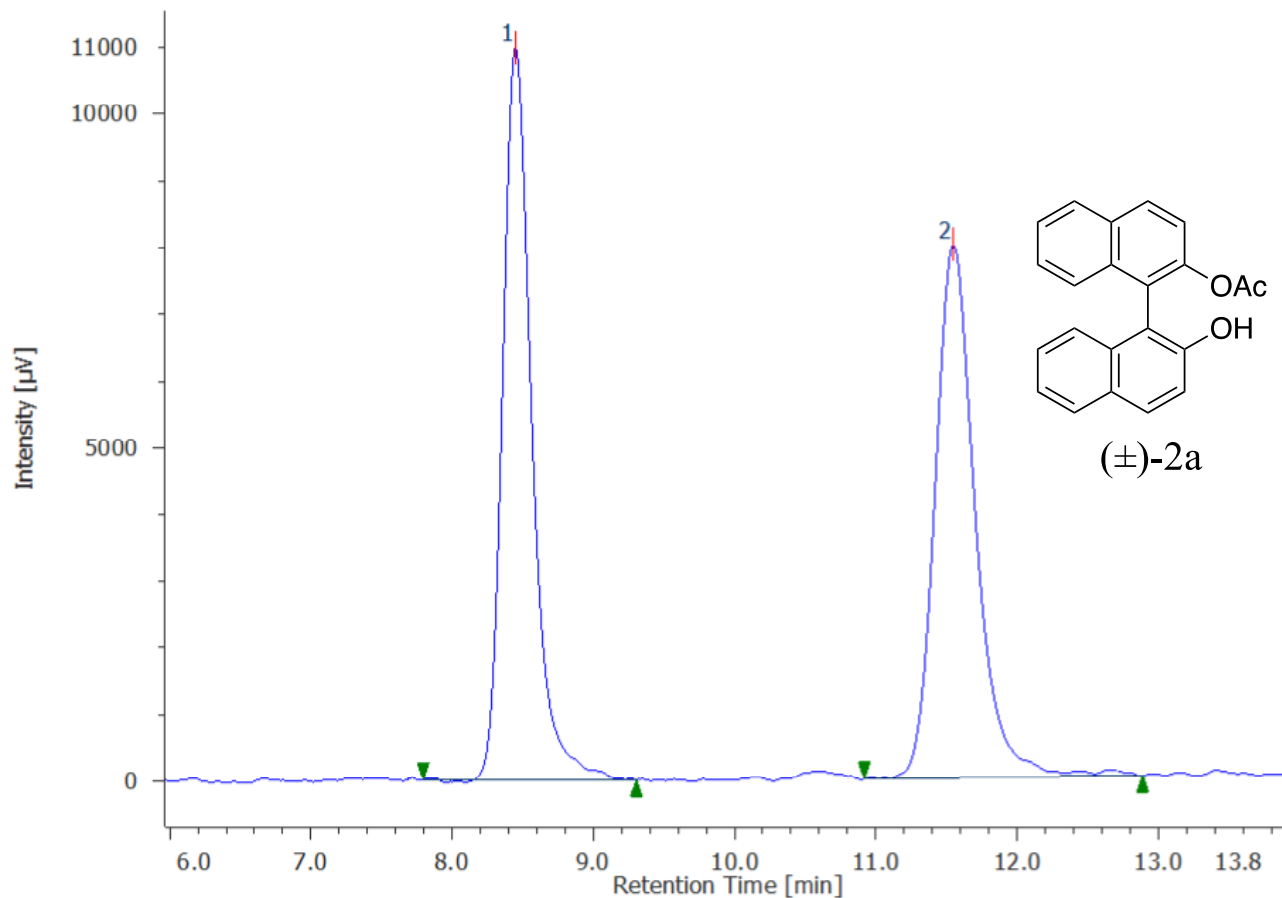

| # | ピーク名    | CH | tR [min] | 面積 [μV·sec] | 高さ [μV] | 面積%    | 高さ%    | 定量値 | NTP  | 分離度   | シンメトリー係数 | 警告 |
|---|---------|----|----------|-------------|---------|--------|--------|-----|------|-------|----------|----|
| 1 | Unknown | 9  | 8.447    | 157049      | 10972   | 49.694 | 57.866 | N/A | 8929 | 7.271 | 1.320    |    |
| 2 | Unknown | 9  | 11.543   | 158983      | 7989    | 50.306 | 42.134 | N/A | 8650 | N/A   | 1.258    |    |

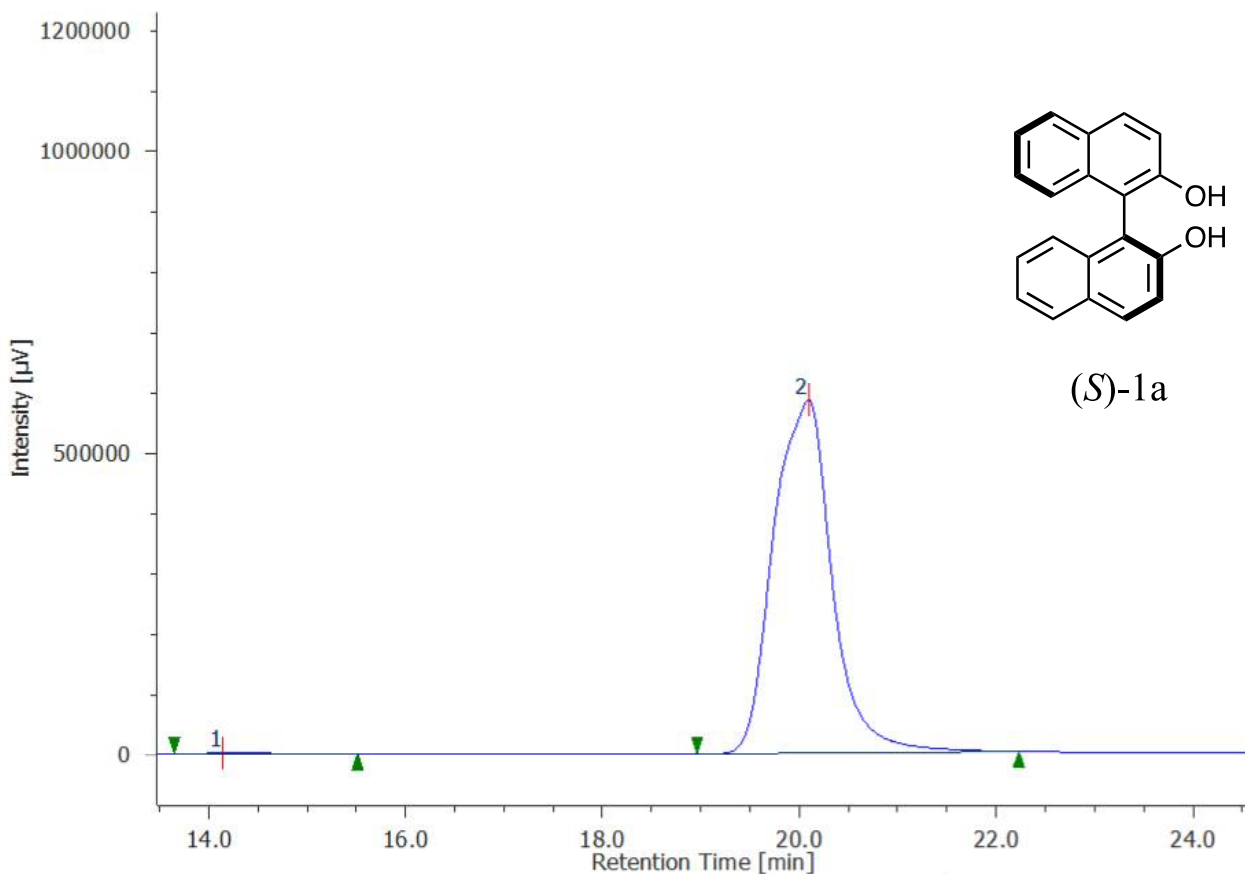

| # | ピーク名    | CH | tR [min] | 面積 [μV·sec] | 高さ [μV] | 面積%    | 高さ%    | 定量値 | NTP  | 分離度   | シンメトリー係数 | 警告 |
|---|---------|----|----------|-------------|---------|--------|--------|-----|------|-------|----------|----|
| 1 | Unknown | 9  | 14.147   | 44389       | 998     | 0.184  | 0.170  | N/A | 2006 | 5.074 | 2.060    |    |
| 2 | Unknown | 9  | 20.093   | 24142267    | 585458  | 99.816 | 99.830 | N/A | 5469 | N/A   | 1.048    |    |

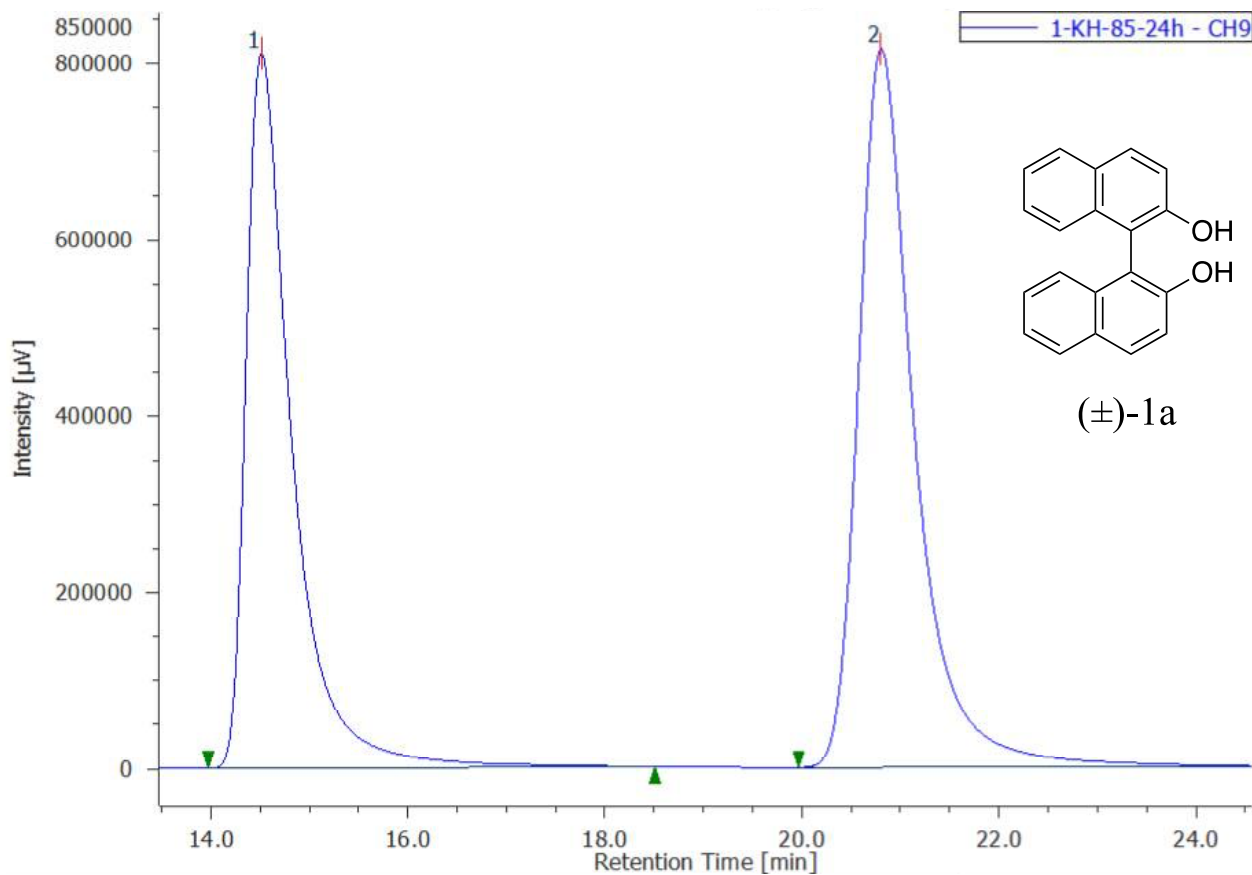

| # | ピーク名    | CH | tR [min] | 面積 [μV·sec] | 高さ [μV] | 面積%    | 高さ%    | 定量値 | NTP  | 分離度   | シンメトリー係数 | 警告 |
|---|---------|----|----------|-------------|---------|--------|--------|-----|------|-------|----------|----|
| 1 | Unknown | 9  | 14.513   | 26492163    | 810738  | 44.923 | 49.888 | N/A | 5630 | 7.282 | 1.951    |    |
| 2 | Unknown | 9  | 20.803   | 32480328    | 814371  | 55.077 | 50.112 | N/A | 7538 | N/A   | 1.512    |    |

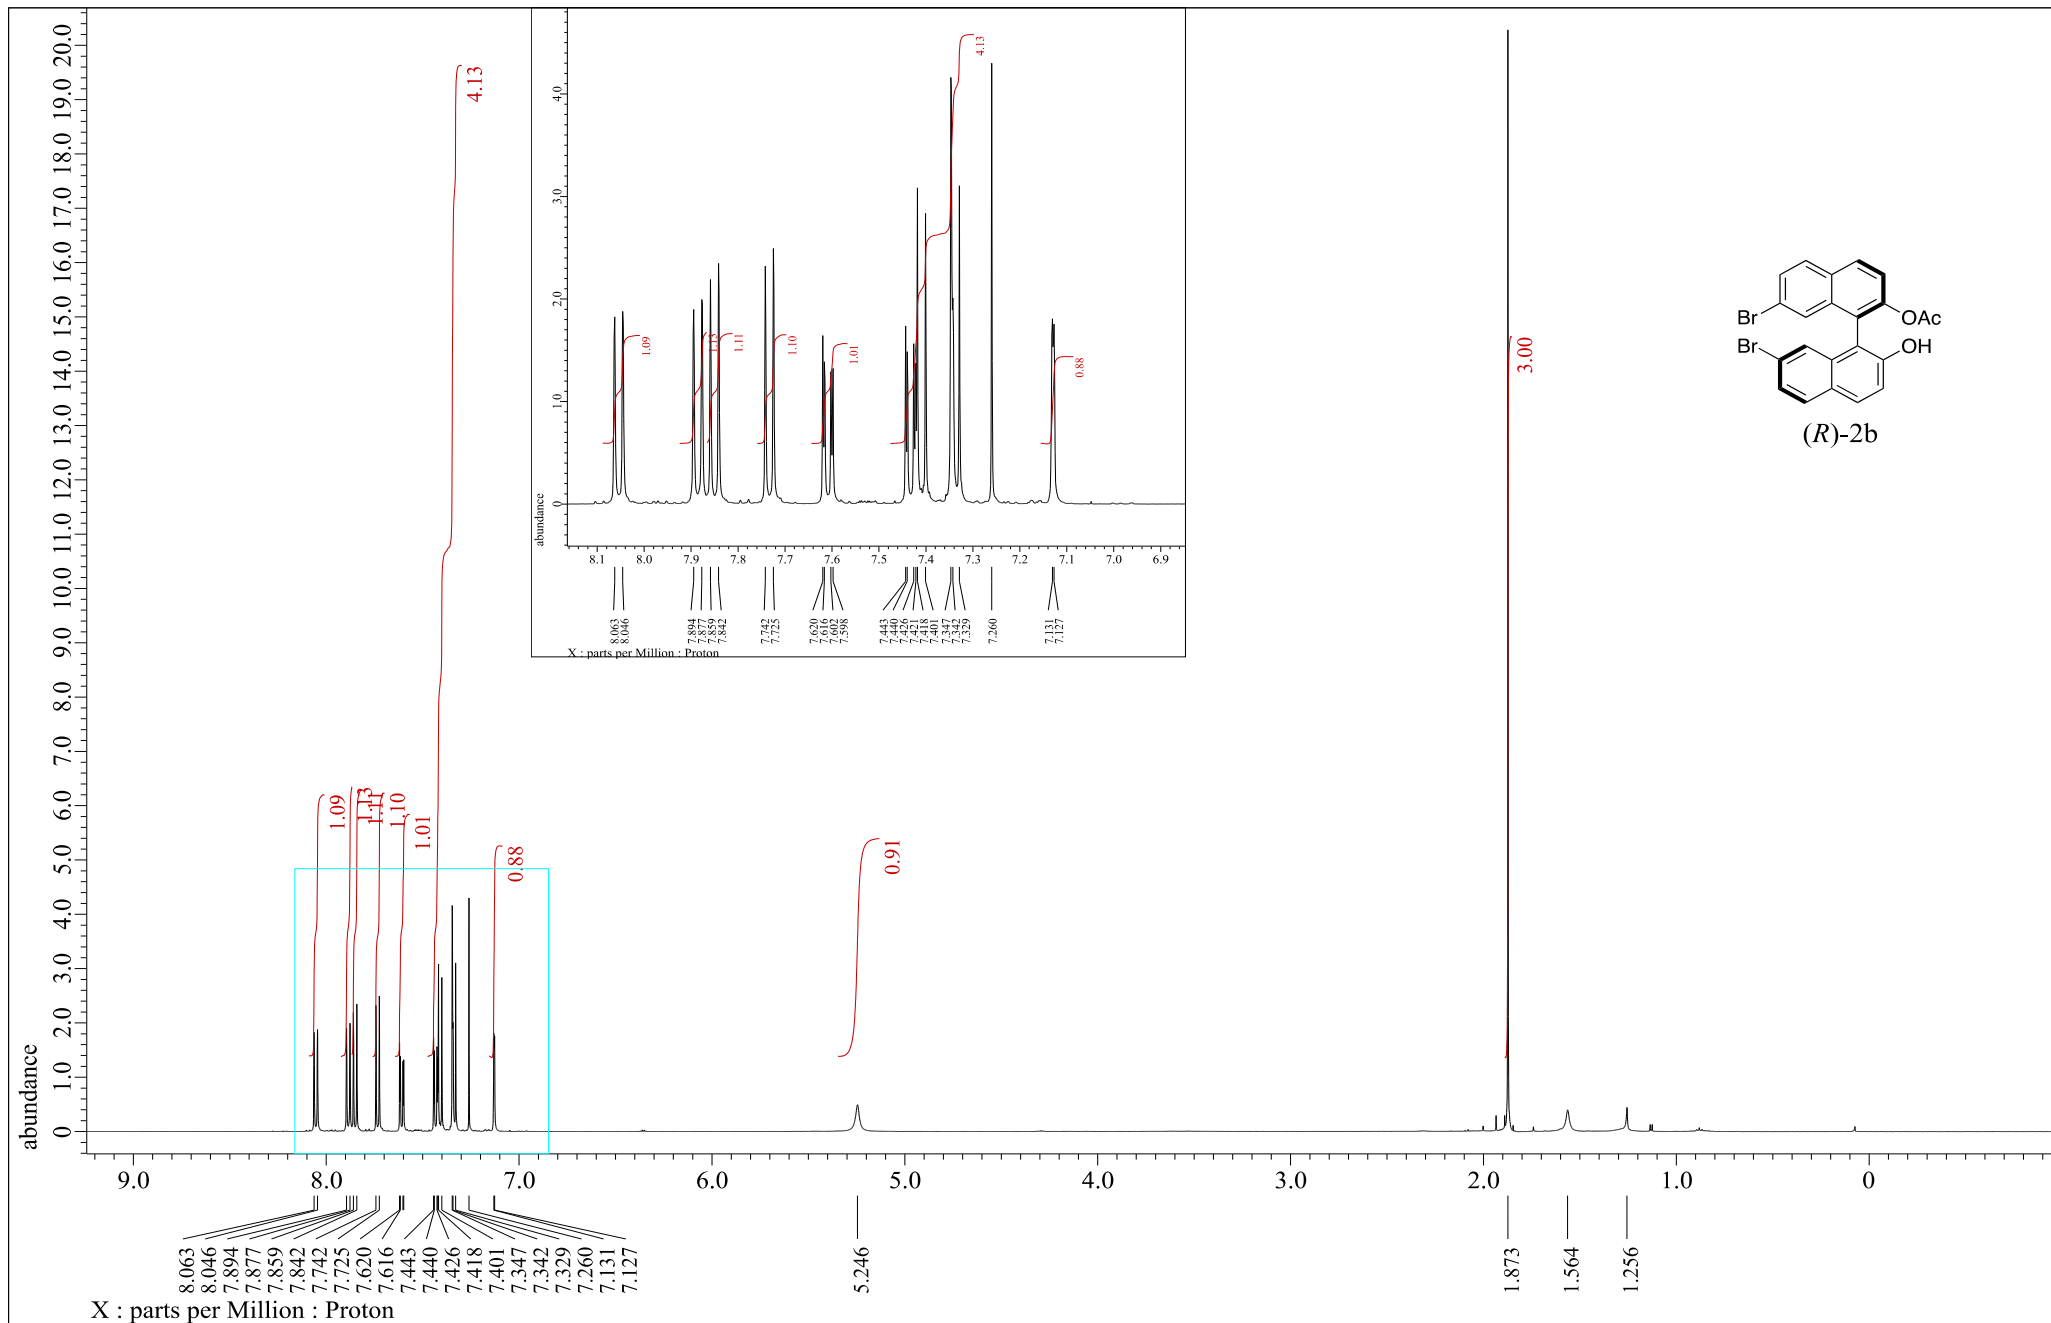

<sup>1</sup>H NMR spectrum (500 MHz, CDCl<sub>3</sub>) of (R)-2b

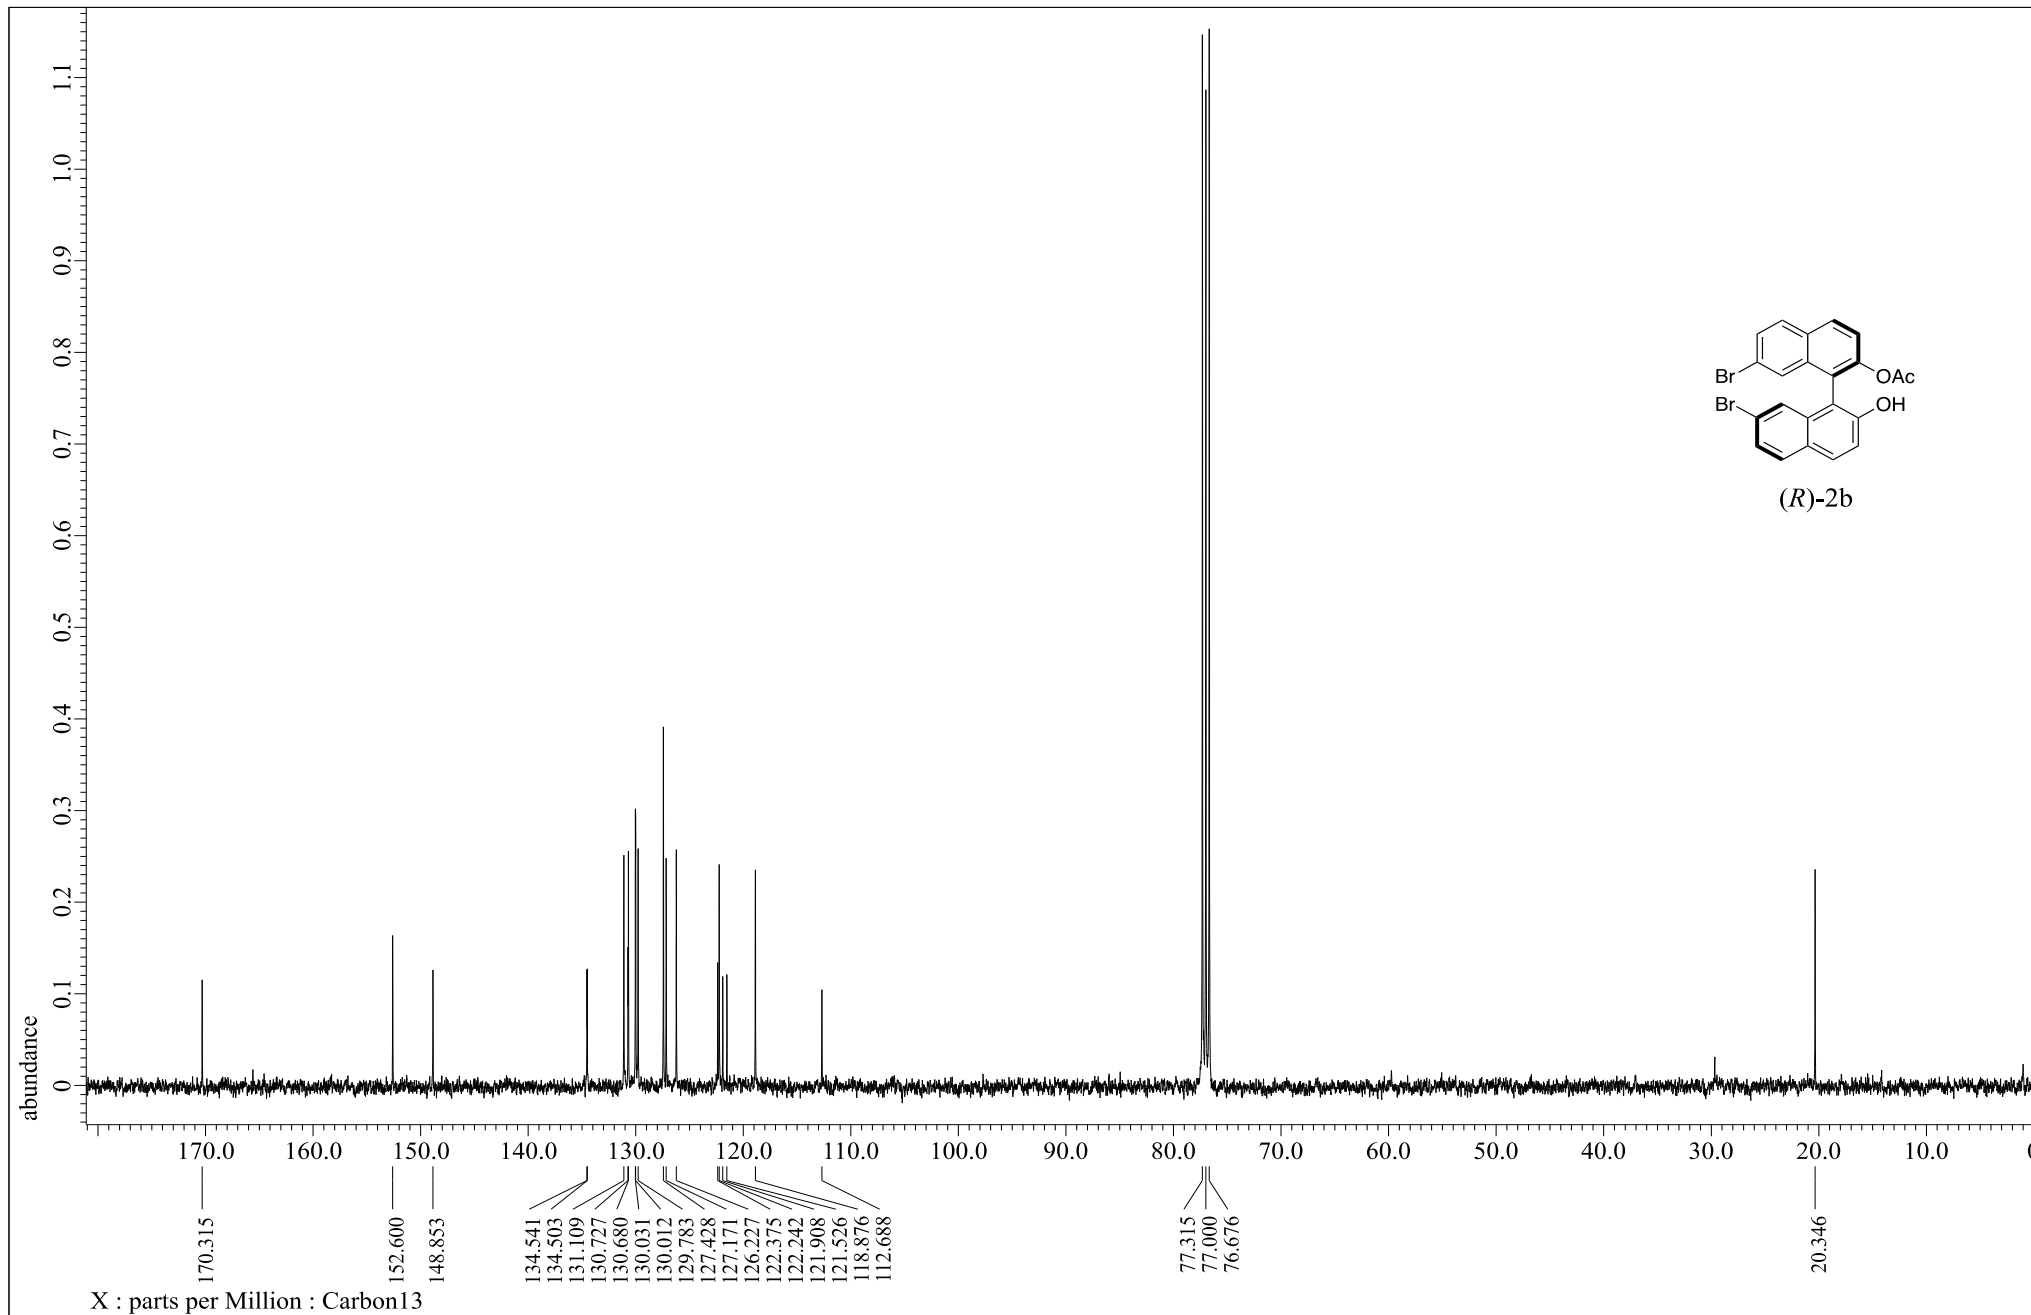

<sup>13</sup>C NMR spectrum (100 MHz, CDCl<sub>3</sub>) of *(R)*-2b

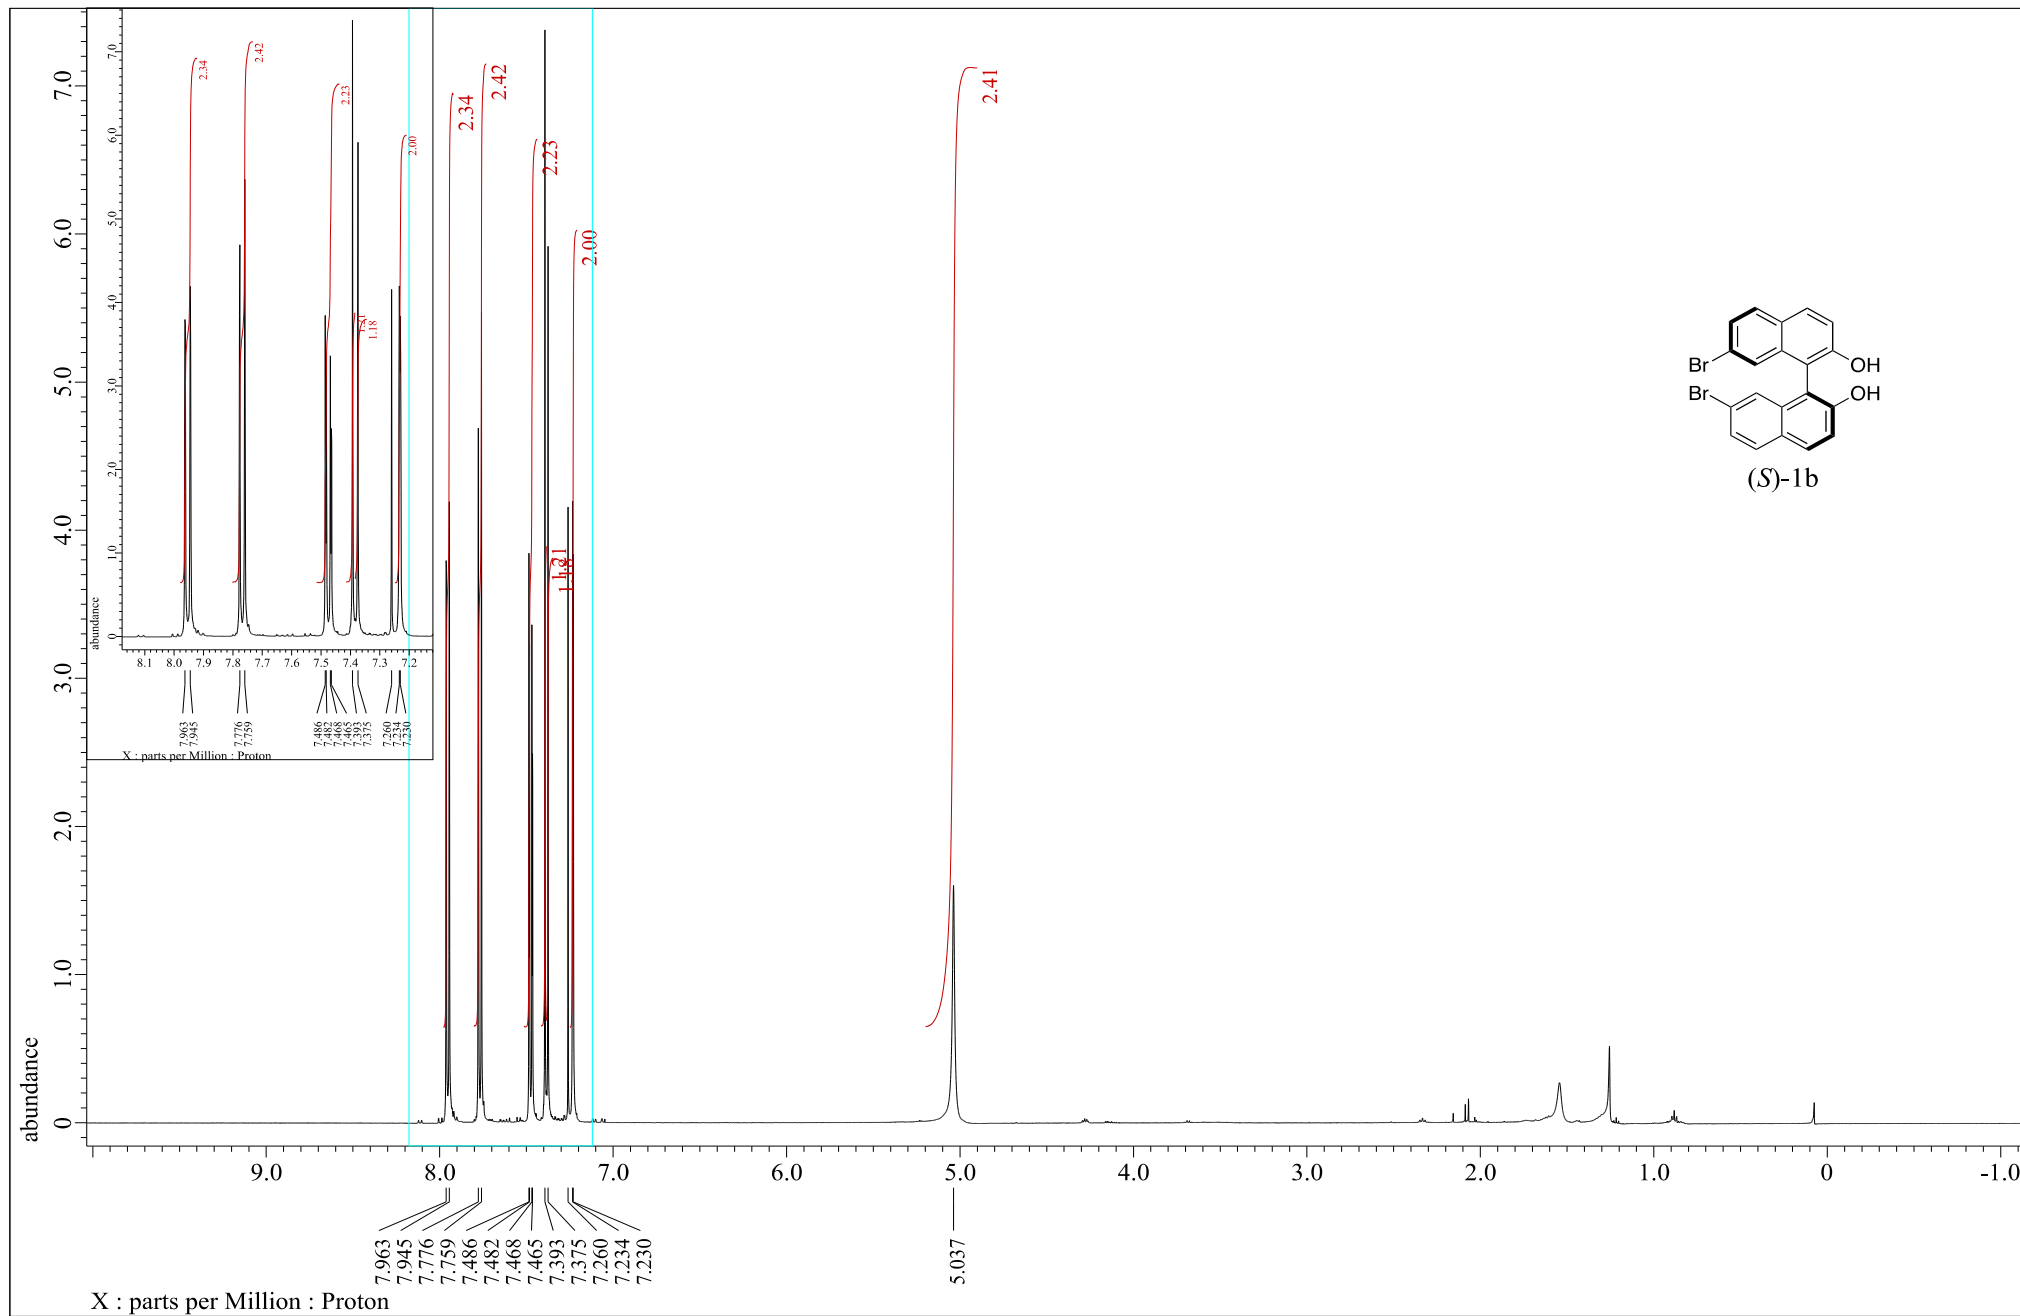

$^1\text{H}$  NMR spectrum (500 MHz,  $\text{CDCl}_3$ ) of (S)-1b



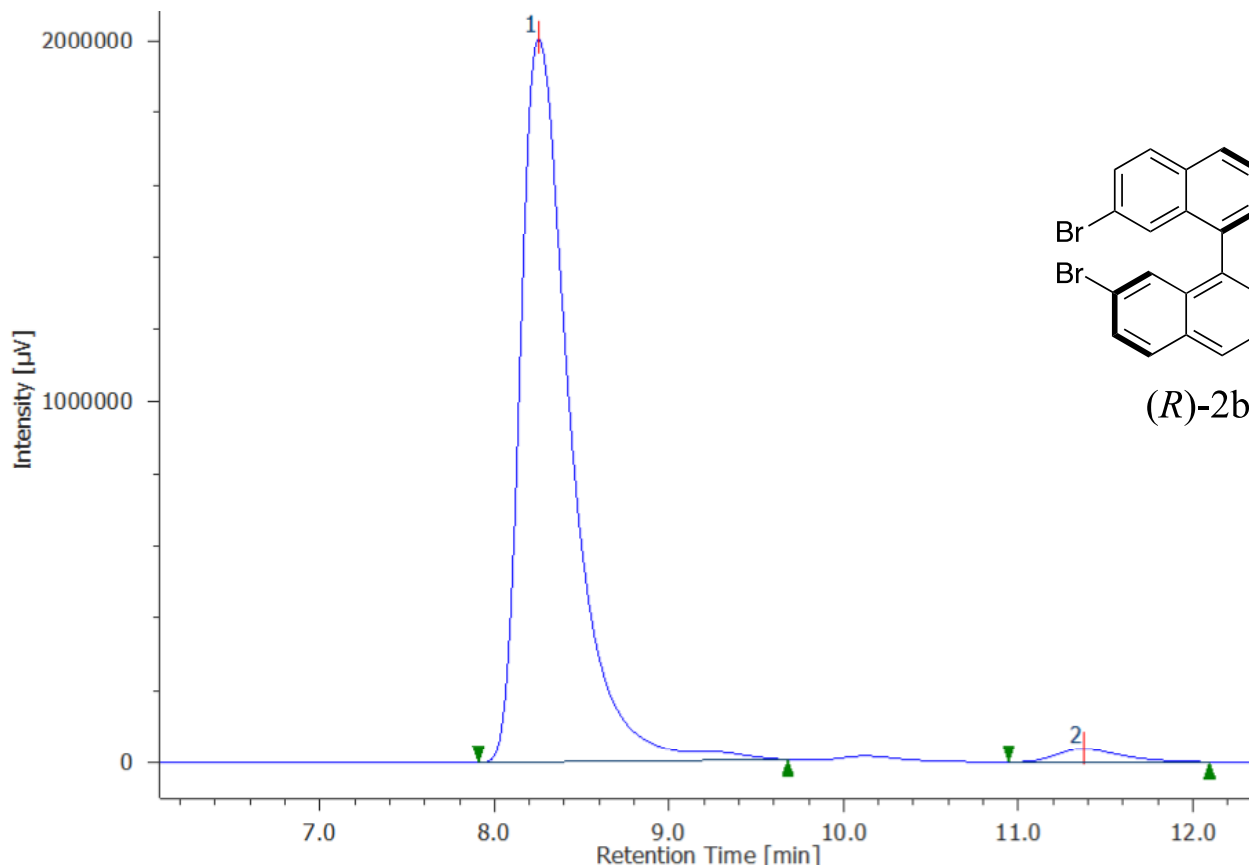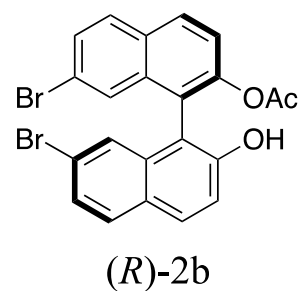

| # | ピーク名    | CH | tR [min] | 面積 [ $\mu\text{V}\cdot\text{sec}$ ] | 高さ [ $\mu\text{V}$ ] | 面積%    | 高さ%    | 定量値 | NTP  | 分離度   | シンメトリー係数 | 警告 |
|---|---------|----|----------|-------------------------------------|----------------------|--------|--------|-----|------|-------|----------|----|
| 1 | Unknown | 9  | 8.253    | 39879650                            | 2002522              | 97.684 | 98.183 | N/A | 4608 | 5.454 | 1.697    |    |
| 2 | Unknown | 9  | 11.370   | 945646                              | 37063                | 2.316  | 1.817  | N/A | 4755 | N/A   | 1.398    |    |

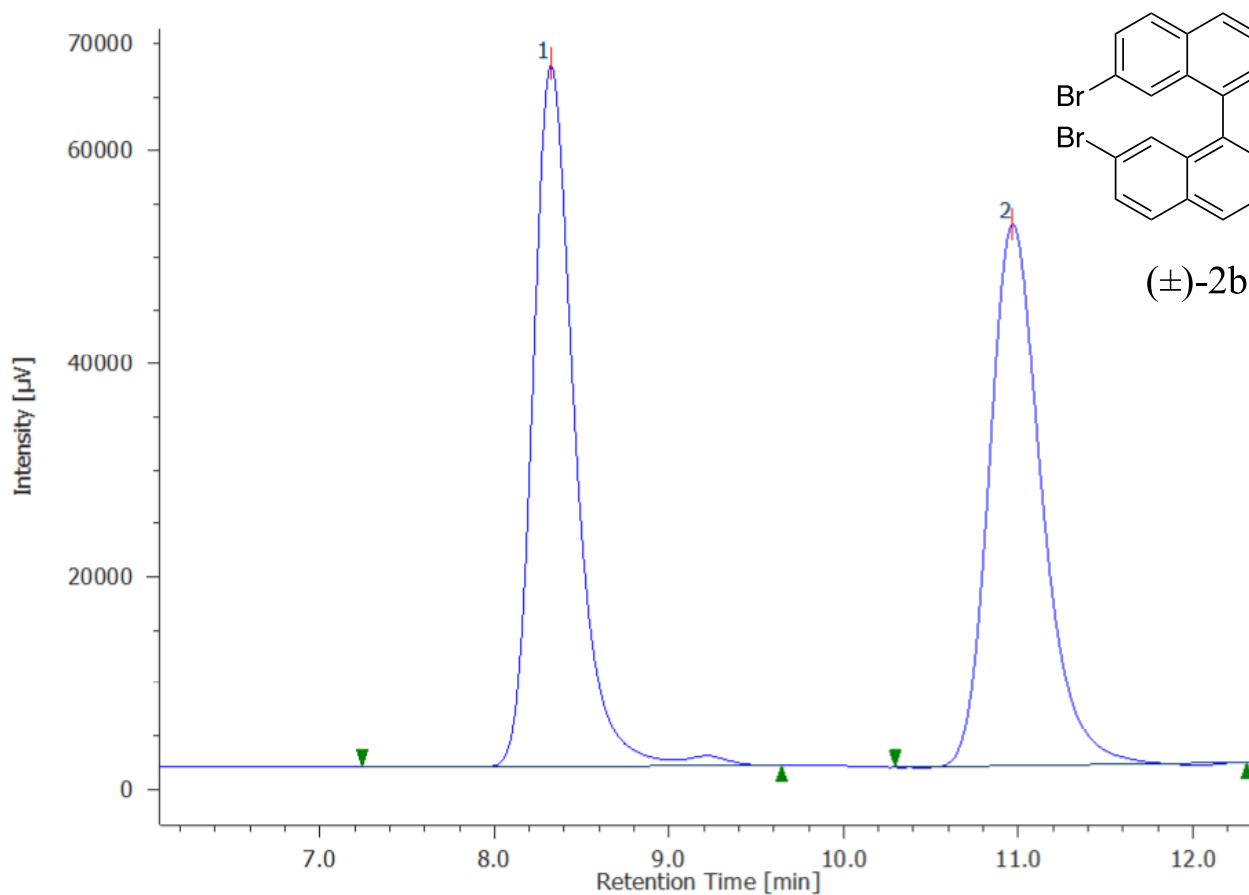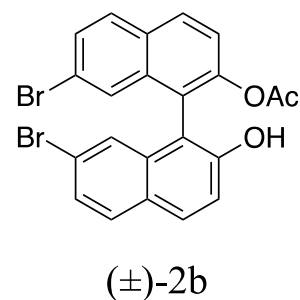

| # | ピーク名    | CH | tR [min] | 面積 [ $\mu\text{V}\cdot\text{sec}$ ] | 高さ [ $\mu\text{V}$ ] | 面積%    | 高さ%    | 定量値 | NTP  | 分離度   | シンメトリー係数 | 警告 |
|---|---------|----|----------|-------------------------------------|----------------------|--------|--------|-----|------|-------|----------|----|
| 1 | Unknown | 9  | 8.323    | 1101313                             | 65835                | 51.011 | 56.412 | N/A | 6419 | 5.598 | 1.315    |    |
| 2 | Unknown | 9  | 10.967   | 1057641                             | 50870                | 48.989 | 43.588 | N/A | 6815 | N/A   | 1.263    |    |

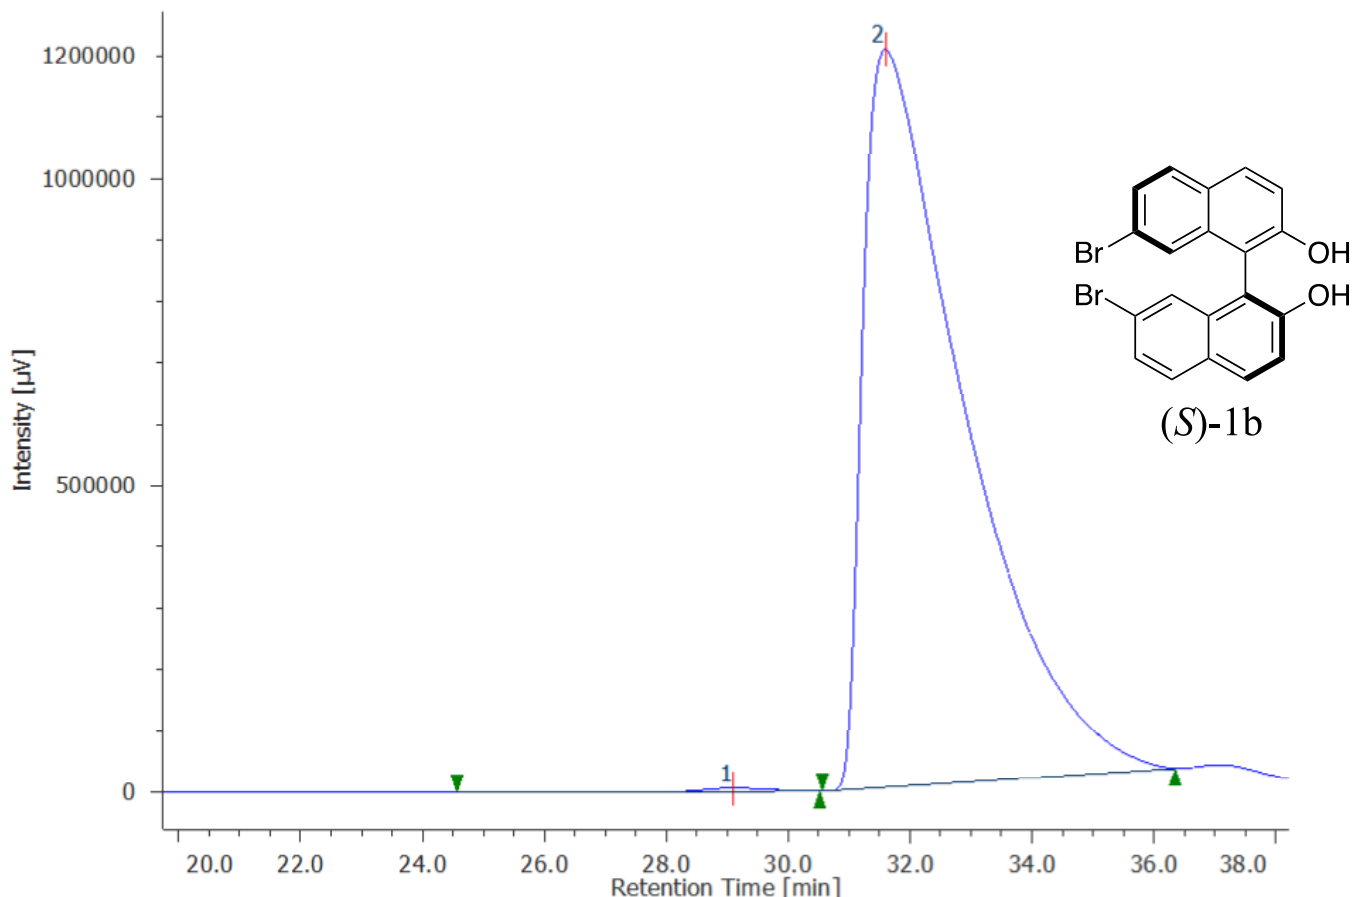

| # | ピーク名    | CH | tR [min] | 面積 [μV·sec] | 高さ [μV] | 面積%    | 高さ%    | 定量値 | NTP  | 分離度   | シンメトリー係数 | 警告 |
|---|---------|----|----------|-------------|---------|--------|--------|-----|------|-------|----------|----|
| 1 | Unknown | 9  | 29.103   | 381629      | 5410    | 0.273  | 0.448  | N/A | 3447 | 1.013 | 1.285    |    |
| 2 | Unknown | 9  | 31.597   | 139264406   | 1201835 | 99.727 | 99.552 | N/A | 1832 | N/A   | 3.265    |    |

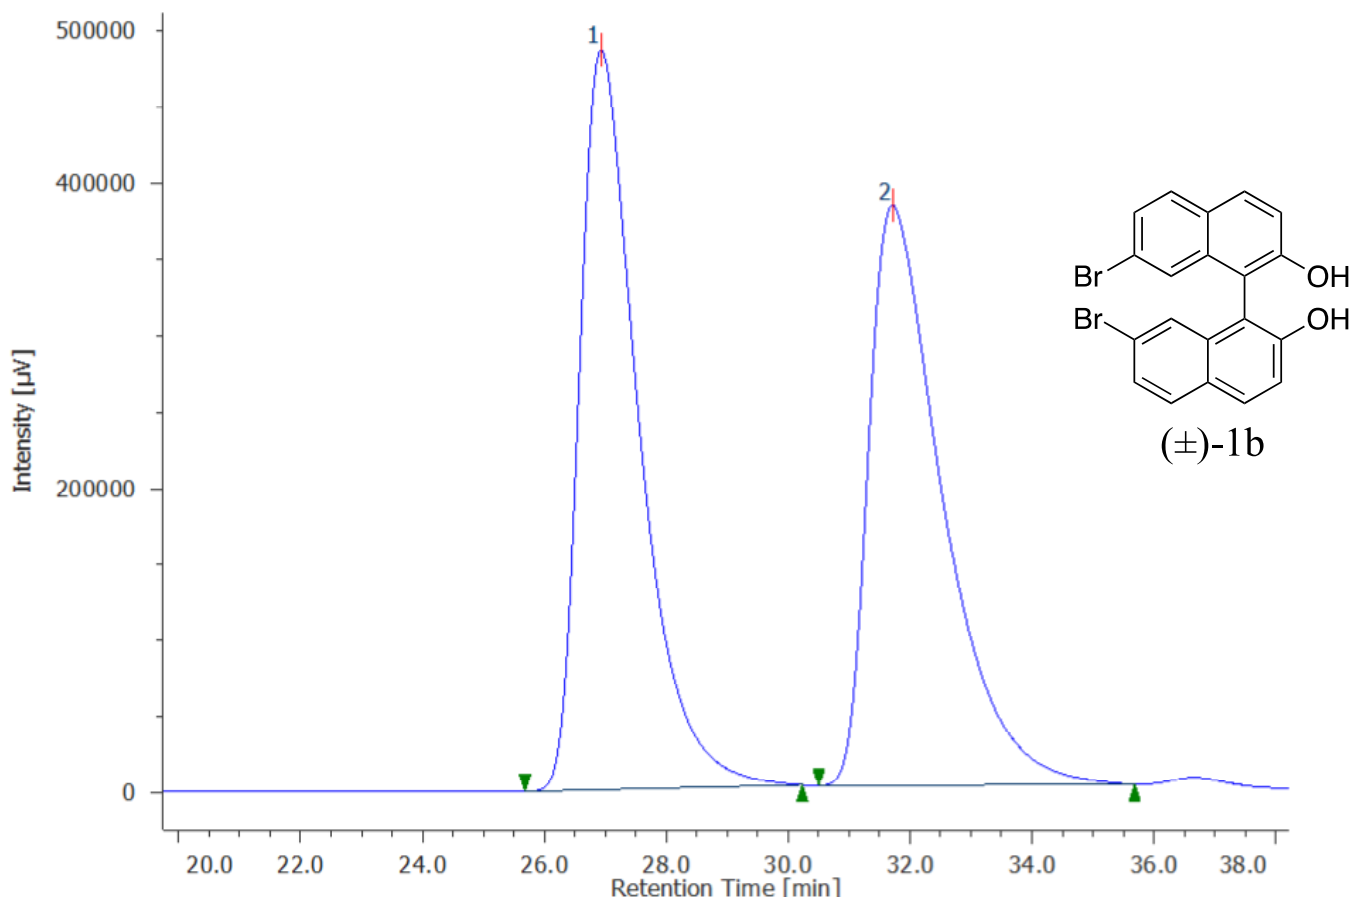

| # | ピーク名    | CH | tR [min] | 面積 [μV·sec] | 高さ [μV] | 面積%    | 高さ%    | 定量値 | NTP  | 分離度   | シンメトリー係数 | 警告 |
|---|---------|----|----------|-------------|---------|--------|--------|-----|------|-------|----------|----|
| 1 | Unknown | 9  | 26.930   | 32735045    | 484797  | 50.574 | 56.087 | N/A | 3988 | 2.501 | 1.689    |    |
| 2 | Unknown | 9  | 31.713   | 31991547    | 379567  | 49.426 | 43.913 | N/A | 3548 | N/A   | 1.924    |    |

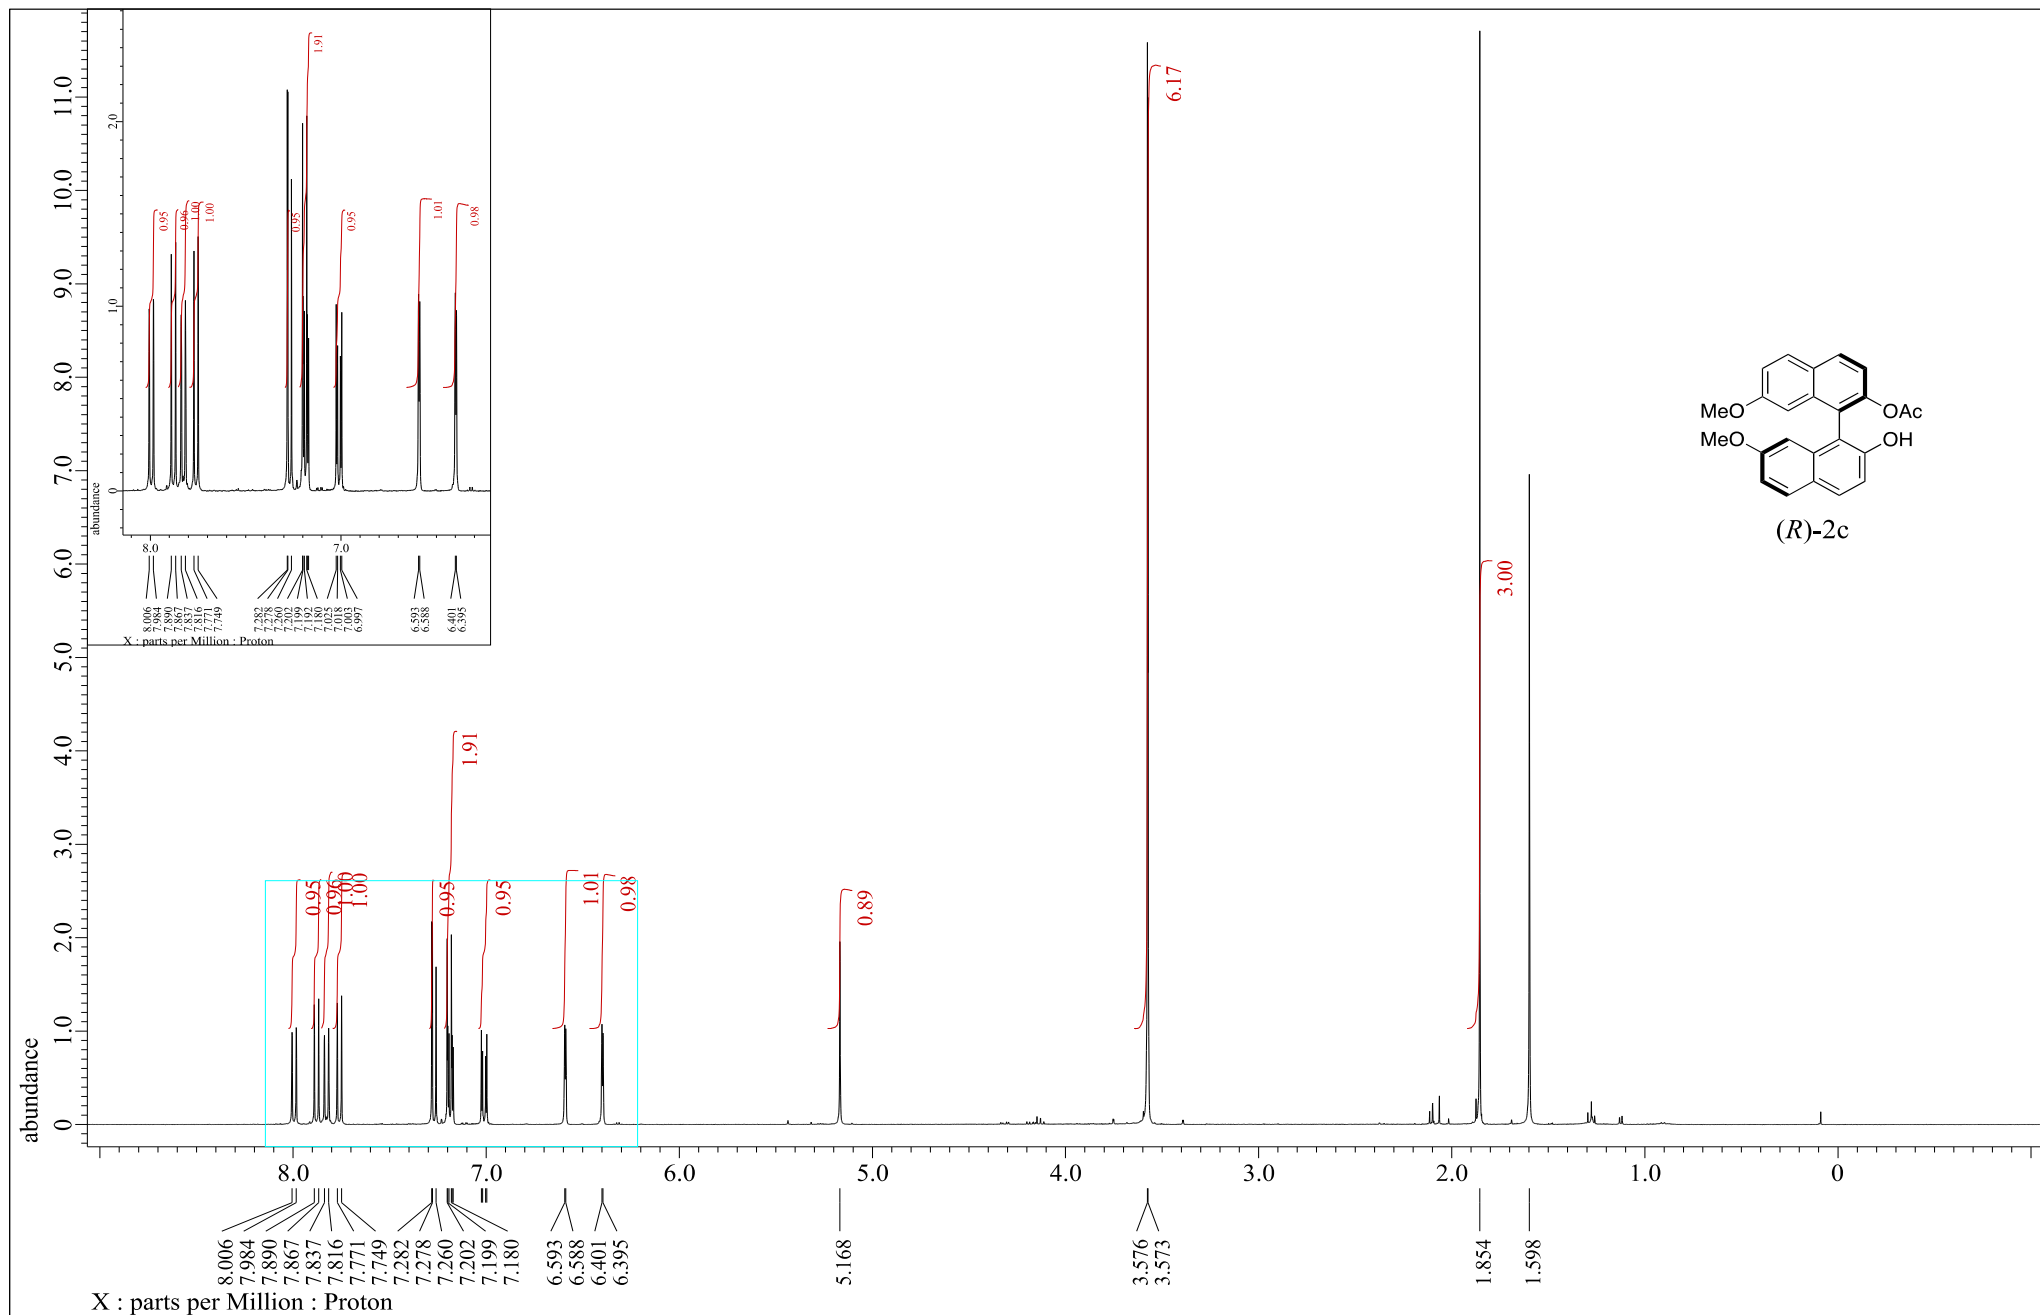

<sup>1</sup>H NMR spectrum (400 MHz, CDCl<sub>3</sub>) of (*R*)-**2c**

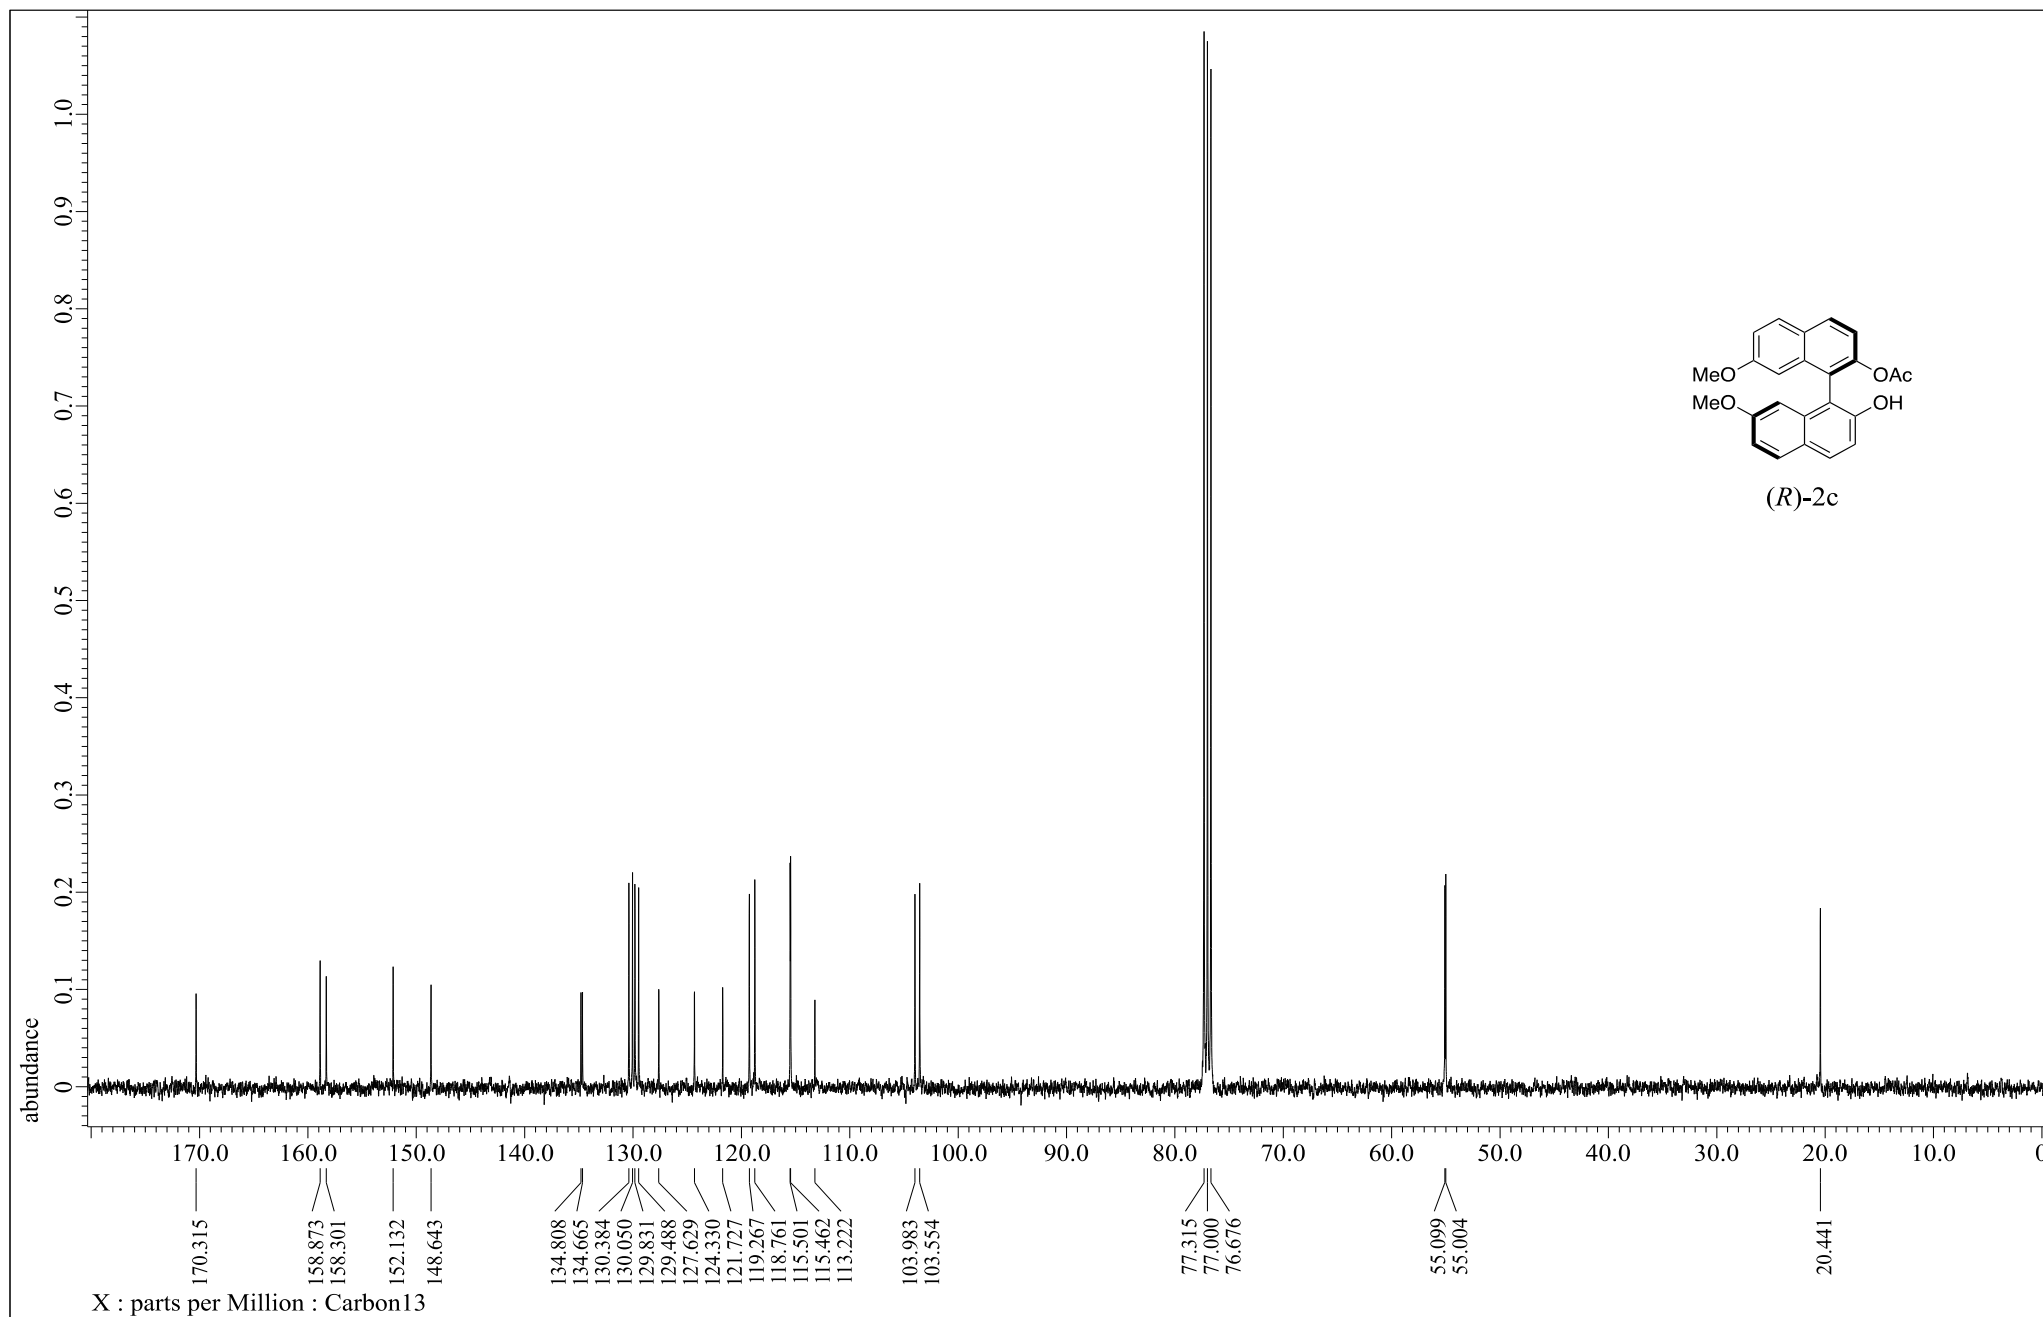

$^{13}\text{C}$  NMR spectrum (100 MHz,  $\text{CDCl}_3$ ) of *(R)*-2c

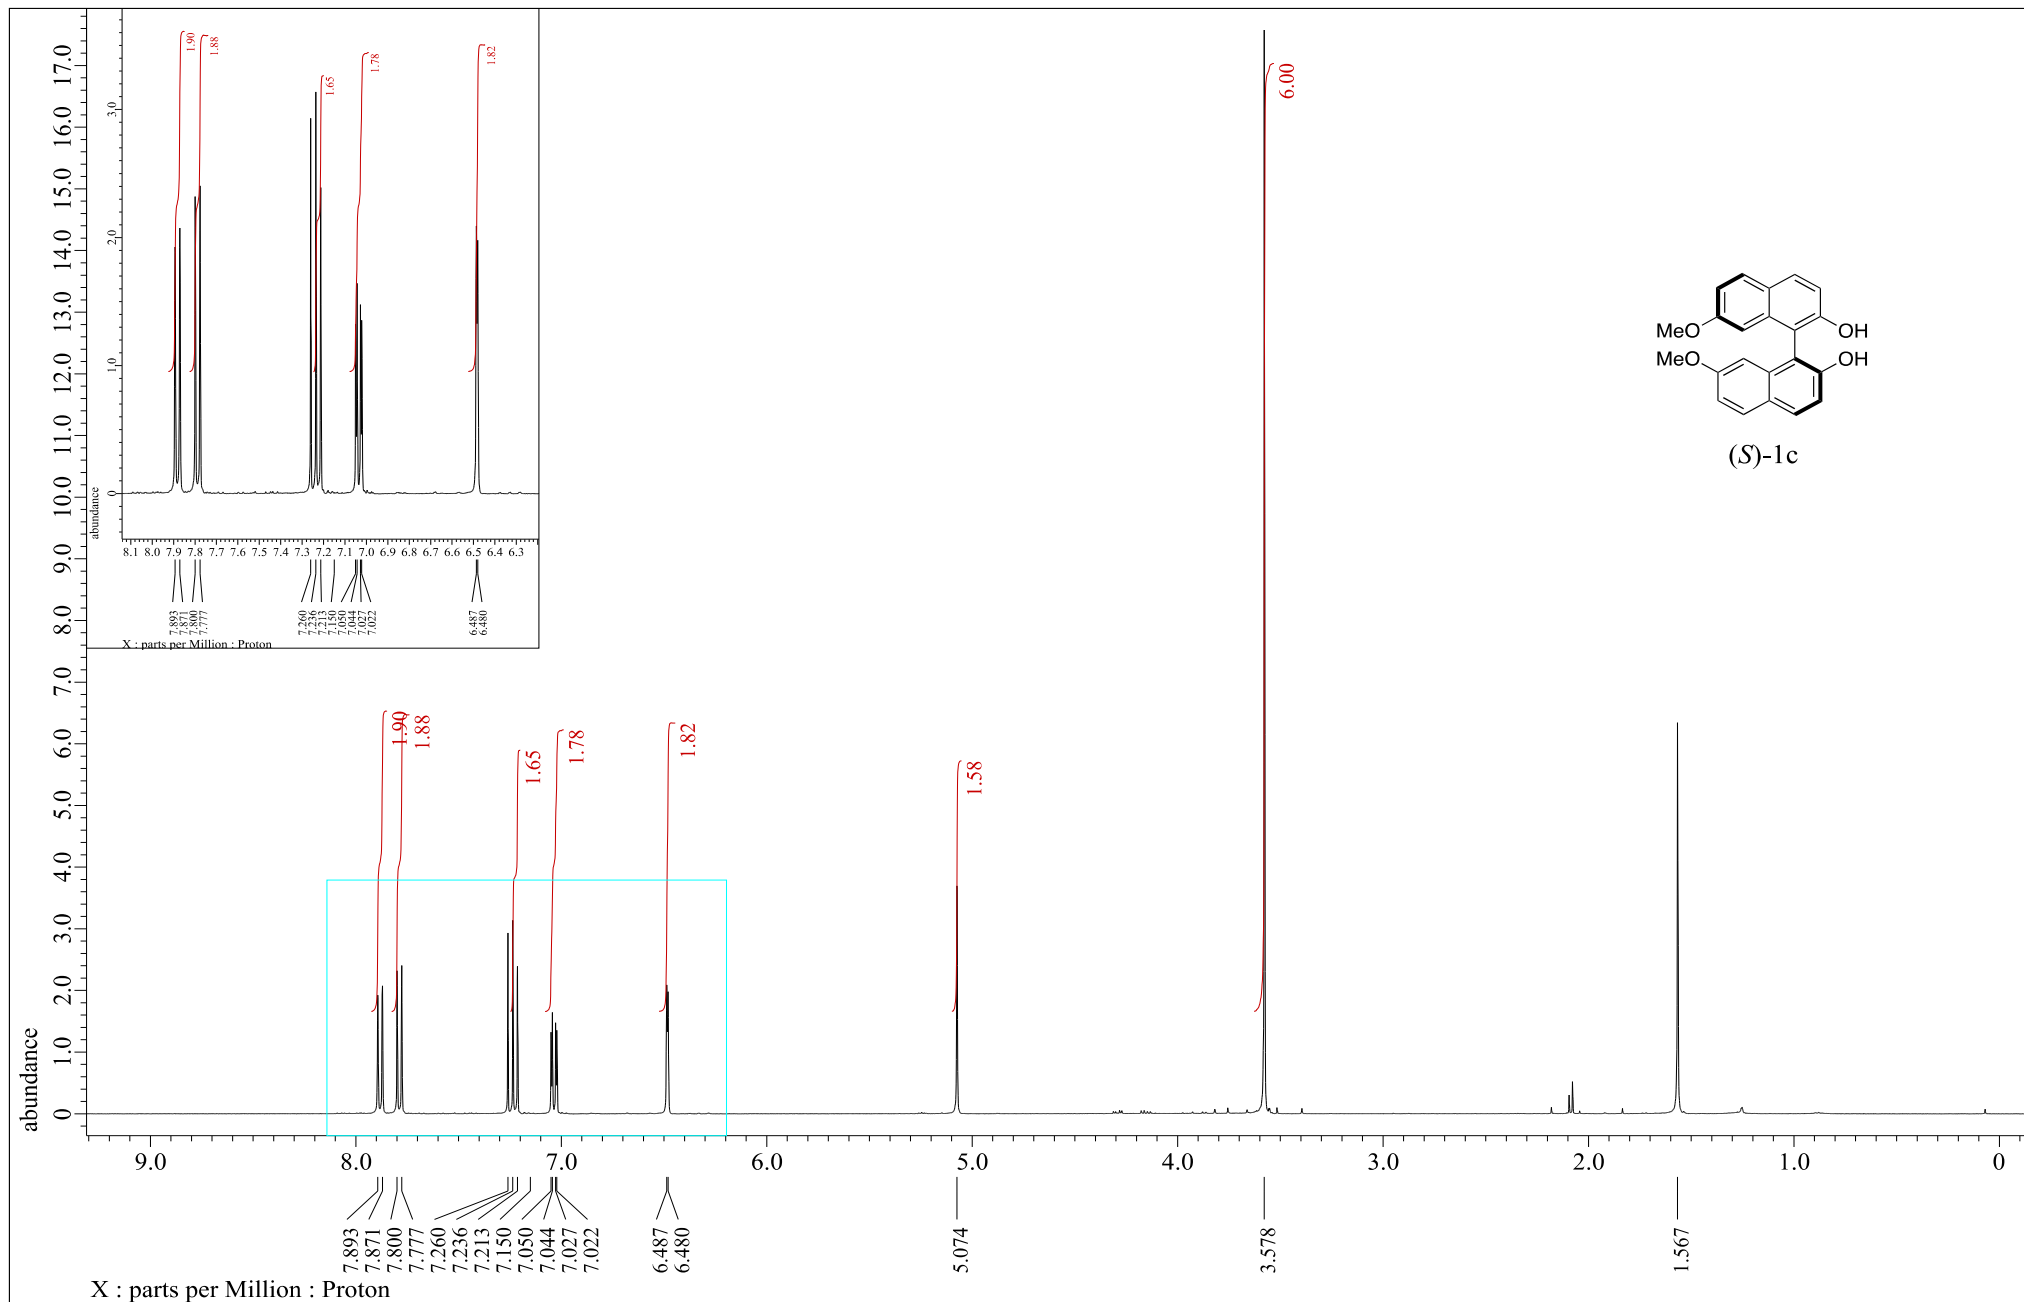

<sup>1</sup>H NMR spectrum (400 MHz, CDCl<sub>3</sub>) of (S)-1c

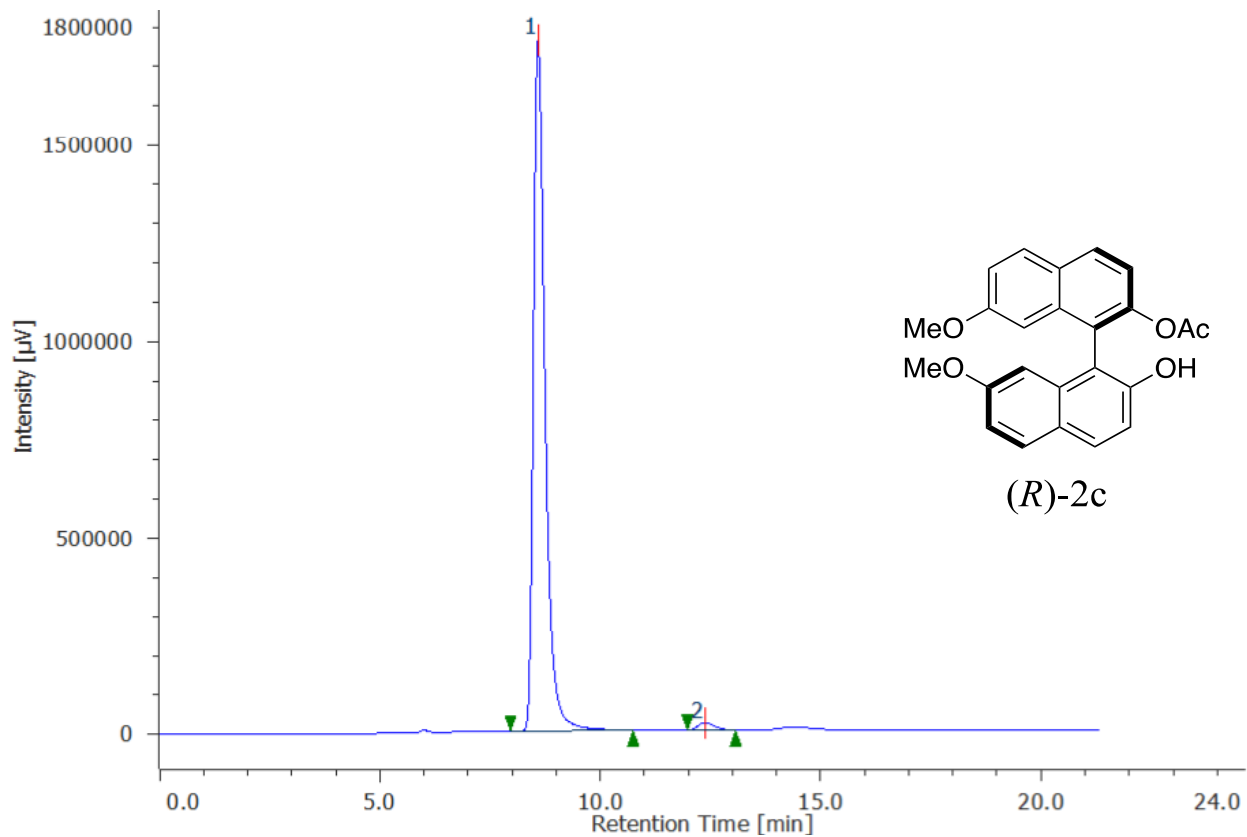

| # | ピーク名    | CH | tR [min] | 面積 [μV·sec] | 高さ [μV] | 面積%    | 高さ%    | 定量値 | NTP  | 分離度   | シンメトリー係数 | 警告 |
|---|---------|----|----------|-------------|---------|--------|--------|-----|------|-------|----------|----|
| 1 | Unknown | 9  | 8.587    | 32434818    | 1758278 | 98.533 | 98.943 | N/A | 5669 | 6.721 | 1.527    |    |
| 2 | Unknown | 9  | 12.380   | 482909      | 18788   | 1.467  | 1.057  | N/A | 5371 | N/A   | 1.279    |    |

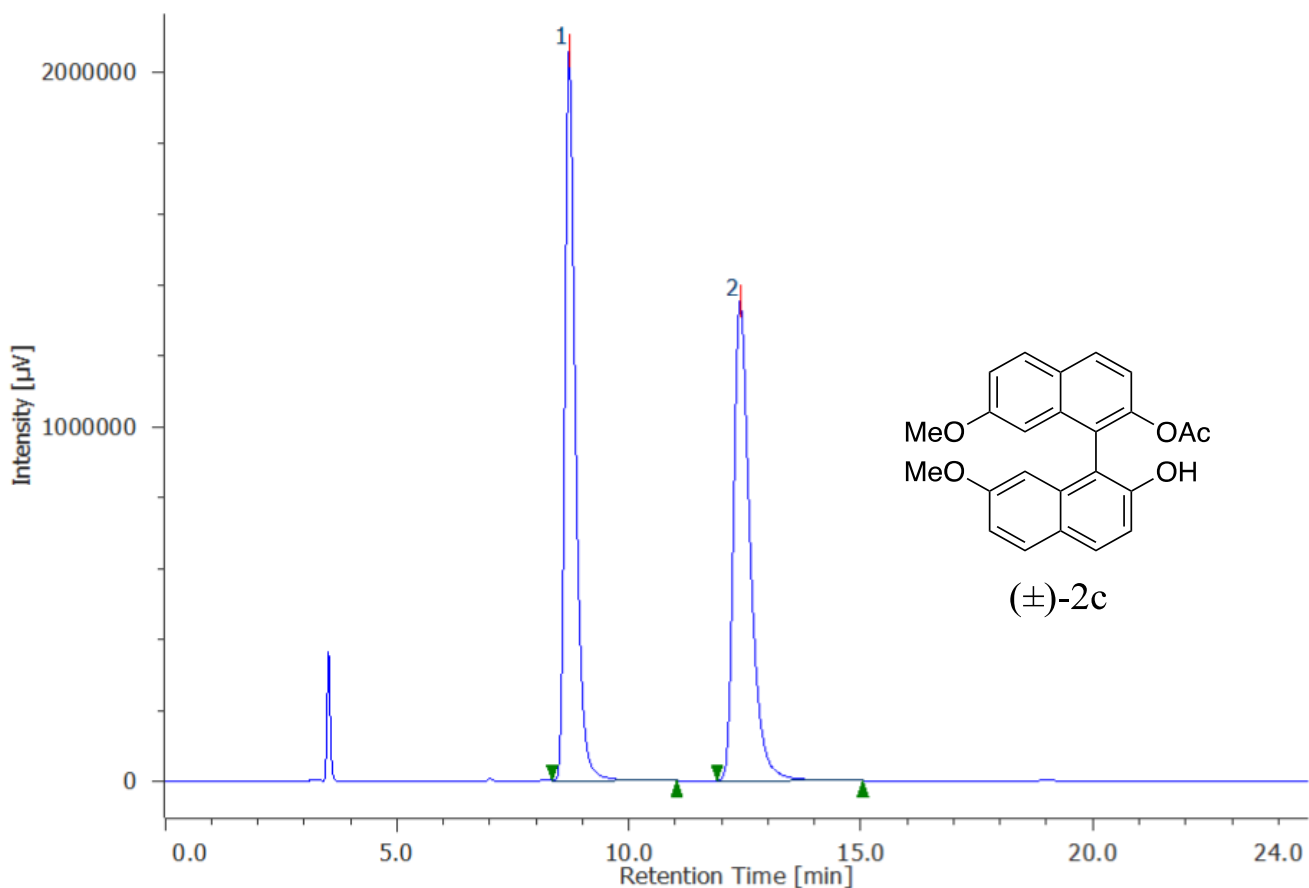

| # | ピーク名    | CH | tR [min] | 面積 [μV·sec] | 高さ [μV] | 面積%    | 高さ%    | 定量値 | NTP  | 分離度   | シンメトリー係数 | 警告 |
|---|---------|----|----------|-------------|---------|--------|--------|-----|------|-------|----------|----|
| 1 | Unknown | 9  | 8.710    | 32896703    | 2056299 | 49.457 | 60.358 | N/A | 7646 | 7.240 | 1.449    |    |
| 2 | Unknown | 9  | 12.397   | 33619093    | 1350533 | 50.543 | 39.642 | N/A | 6340 | N/A   | 1.496    |    |

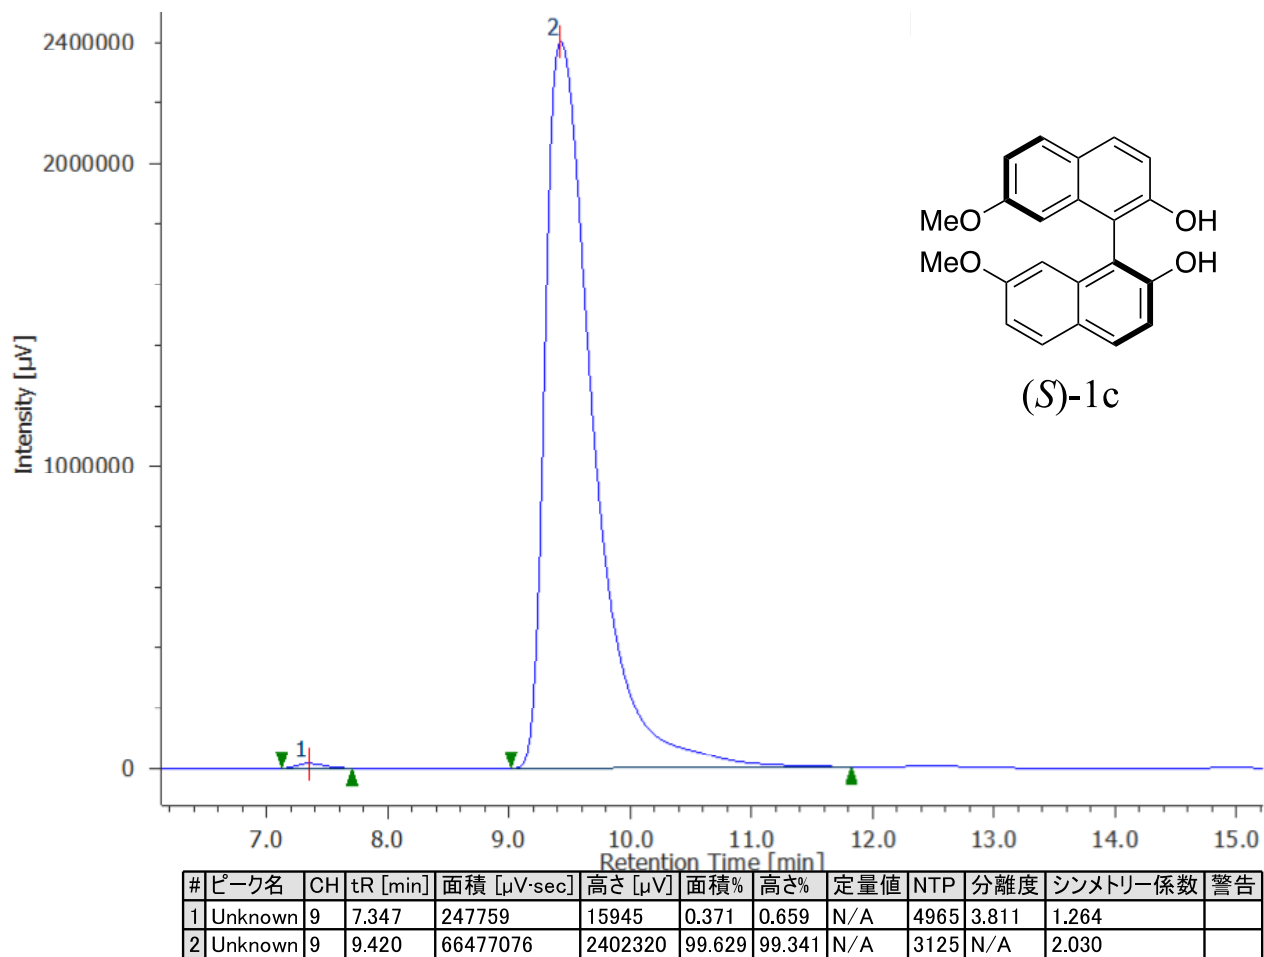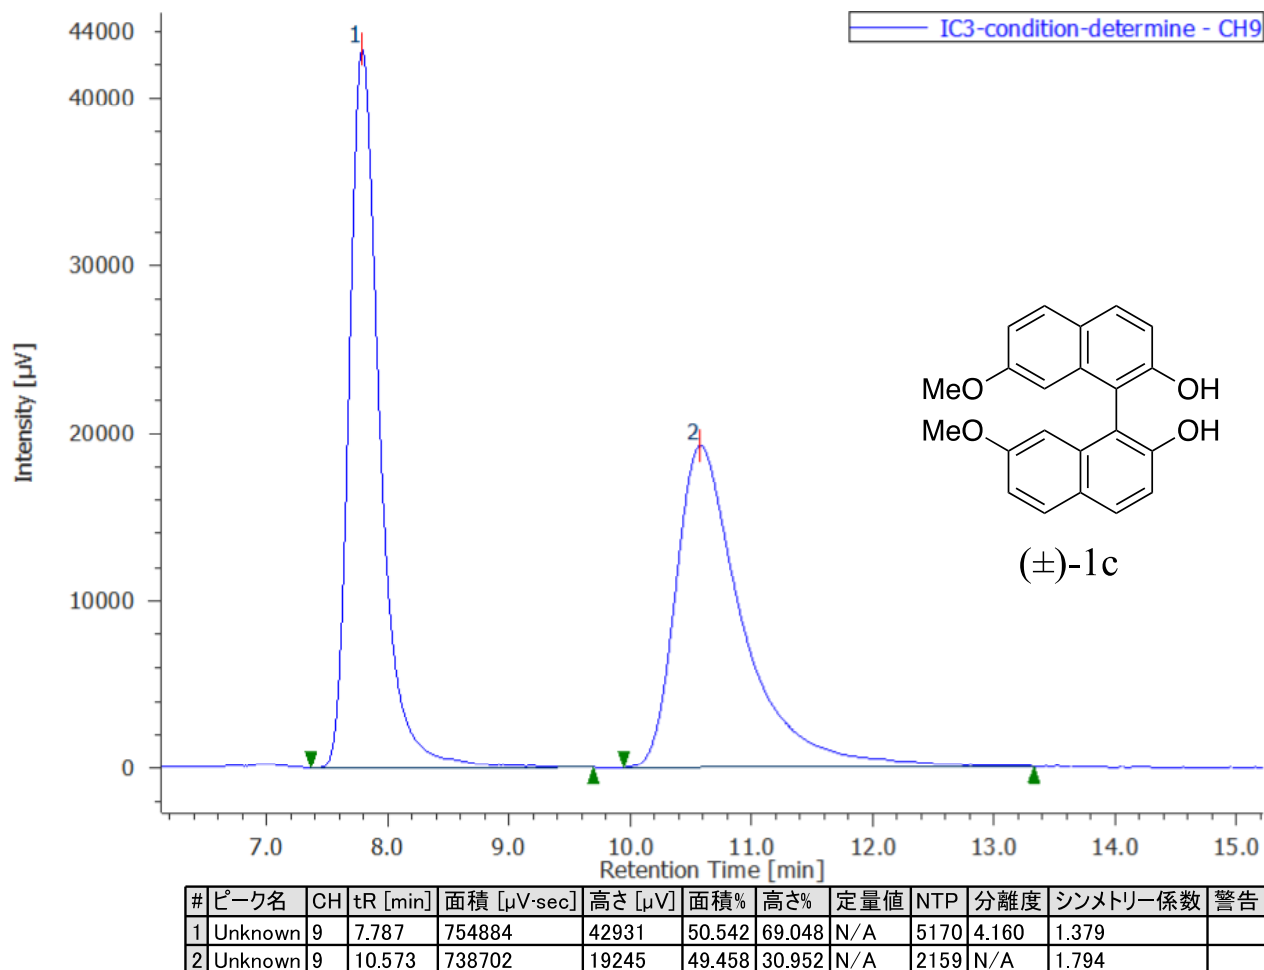

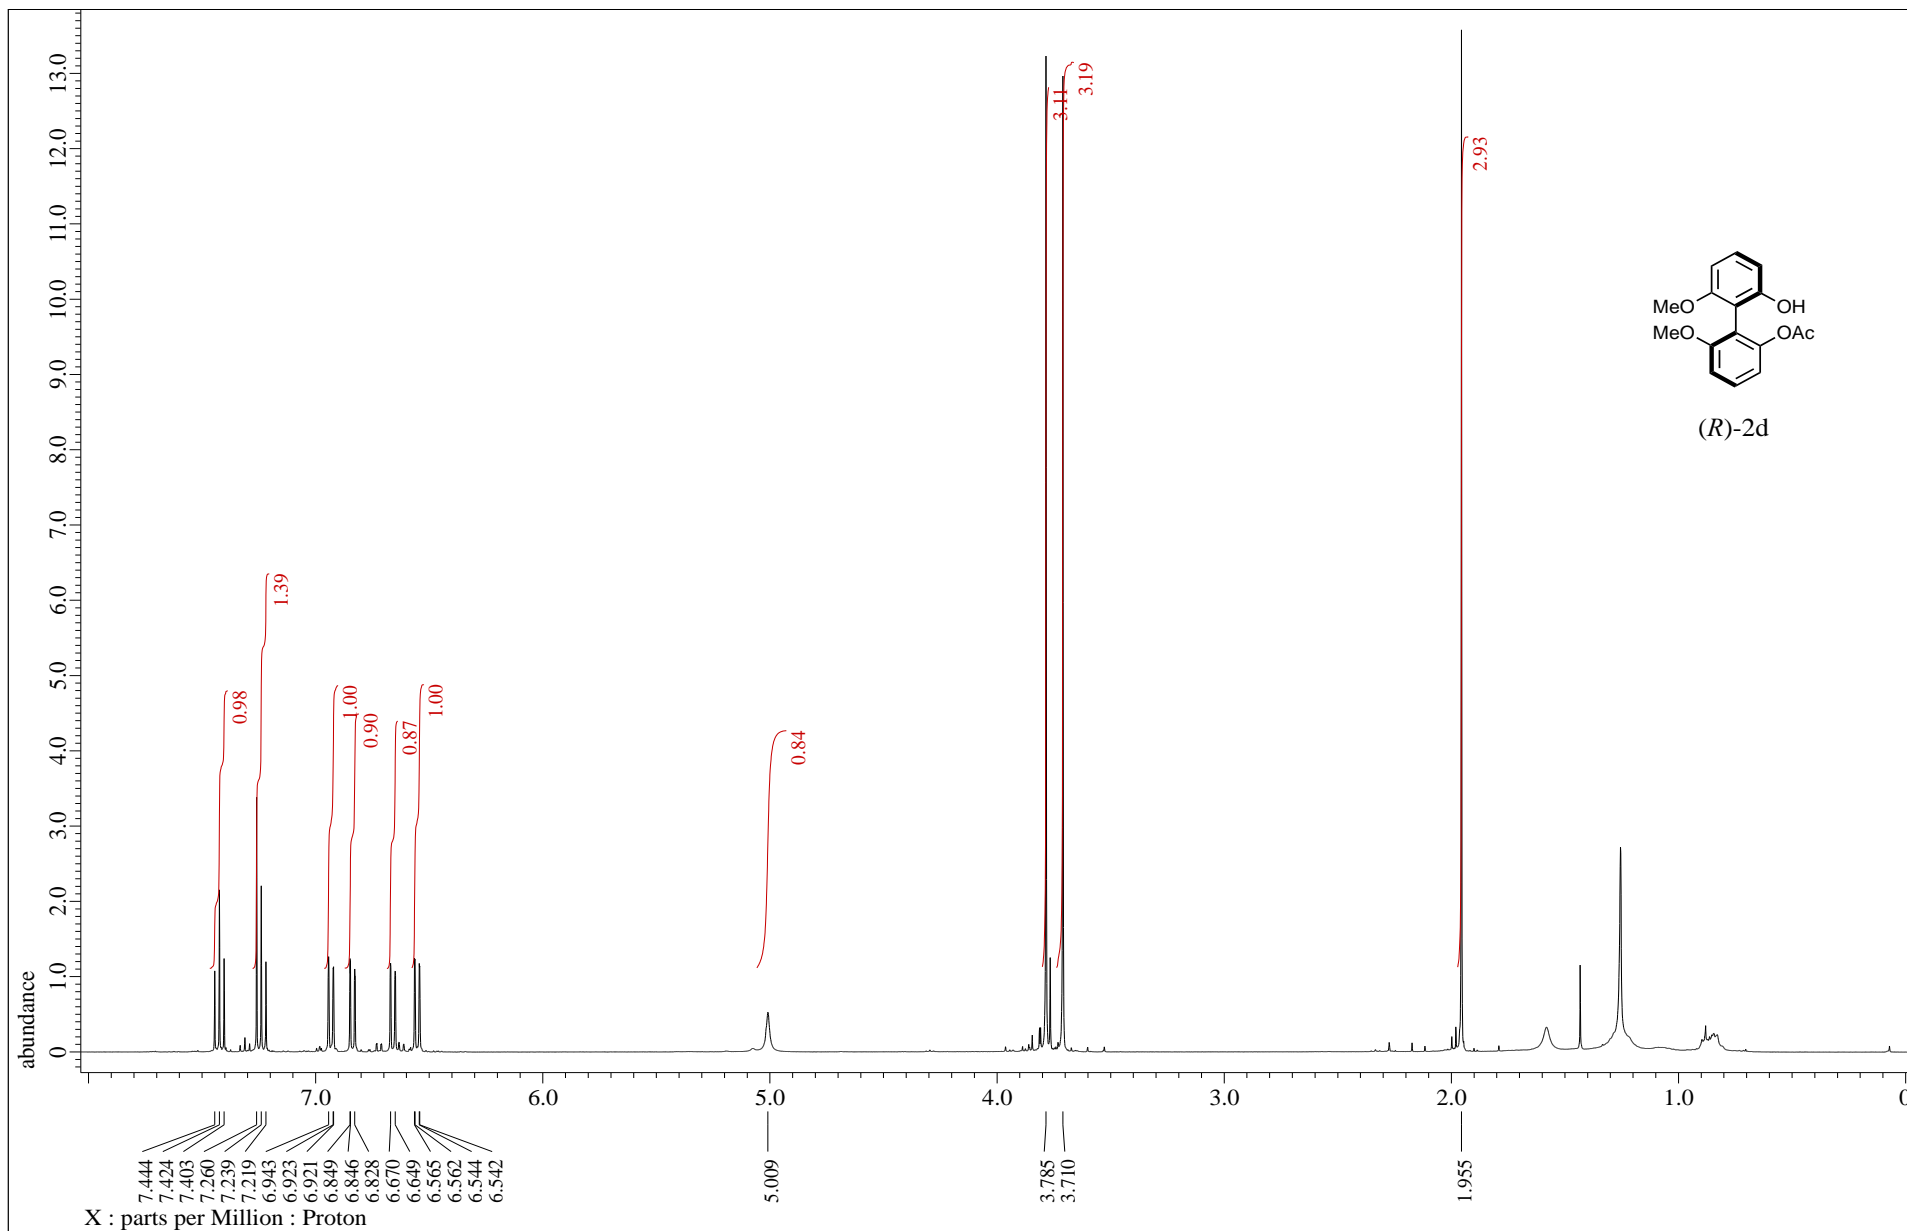

$^1\text{H}$  NMR spectrum (400 MHz,  $\text{CDCl}_3$ ) of (*R*)-**2d**



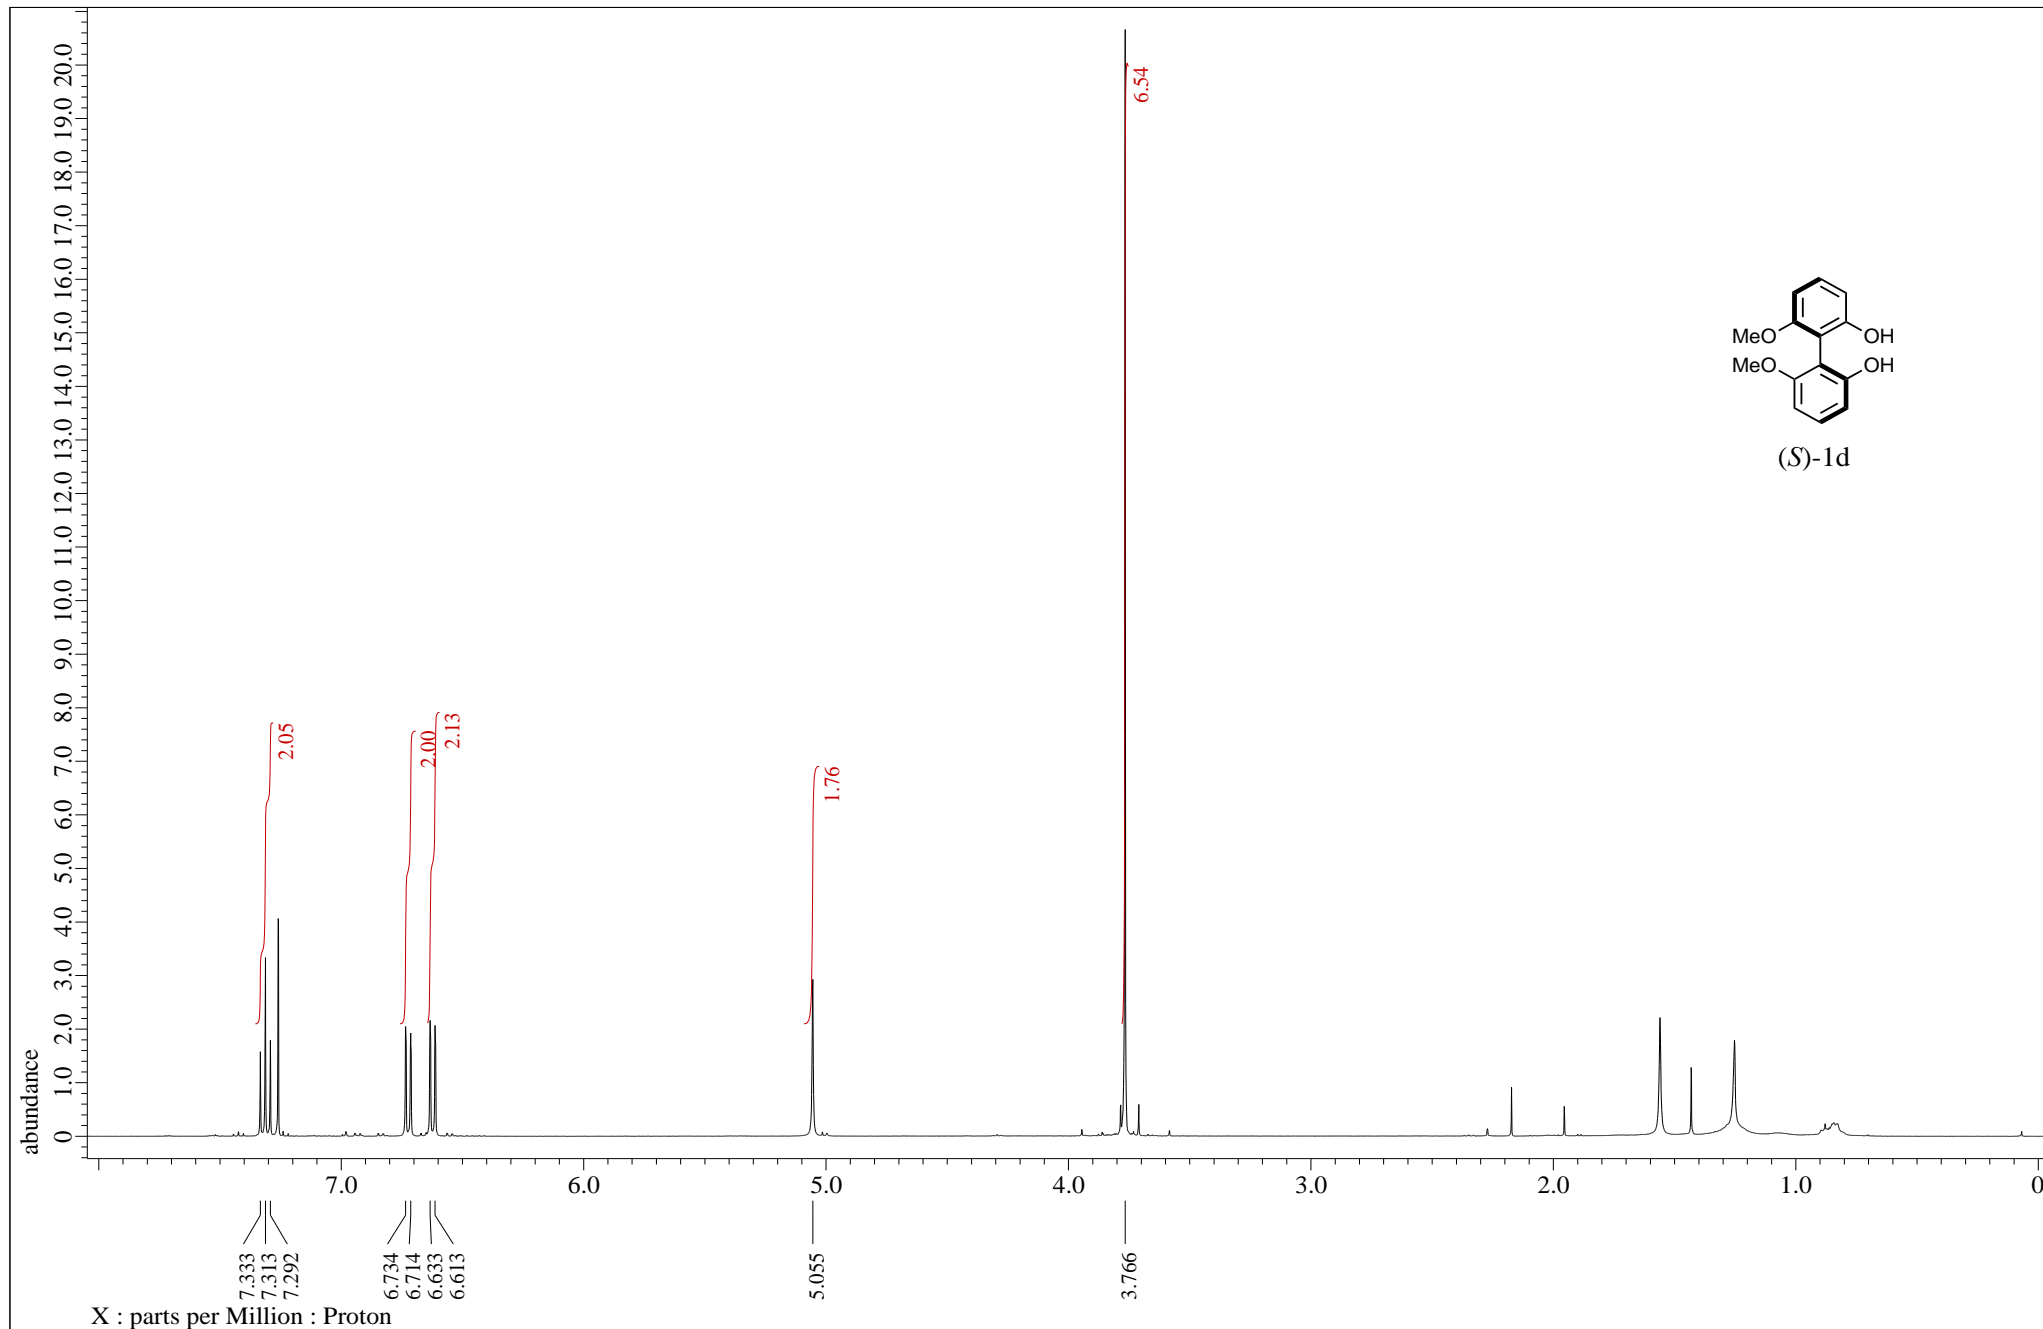

<sup>1</sup>H NMR spectra (400 MHz, CDCl<sub>3</sub>) of (S)-1d

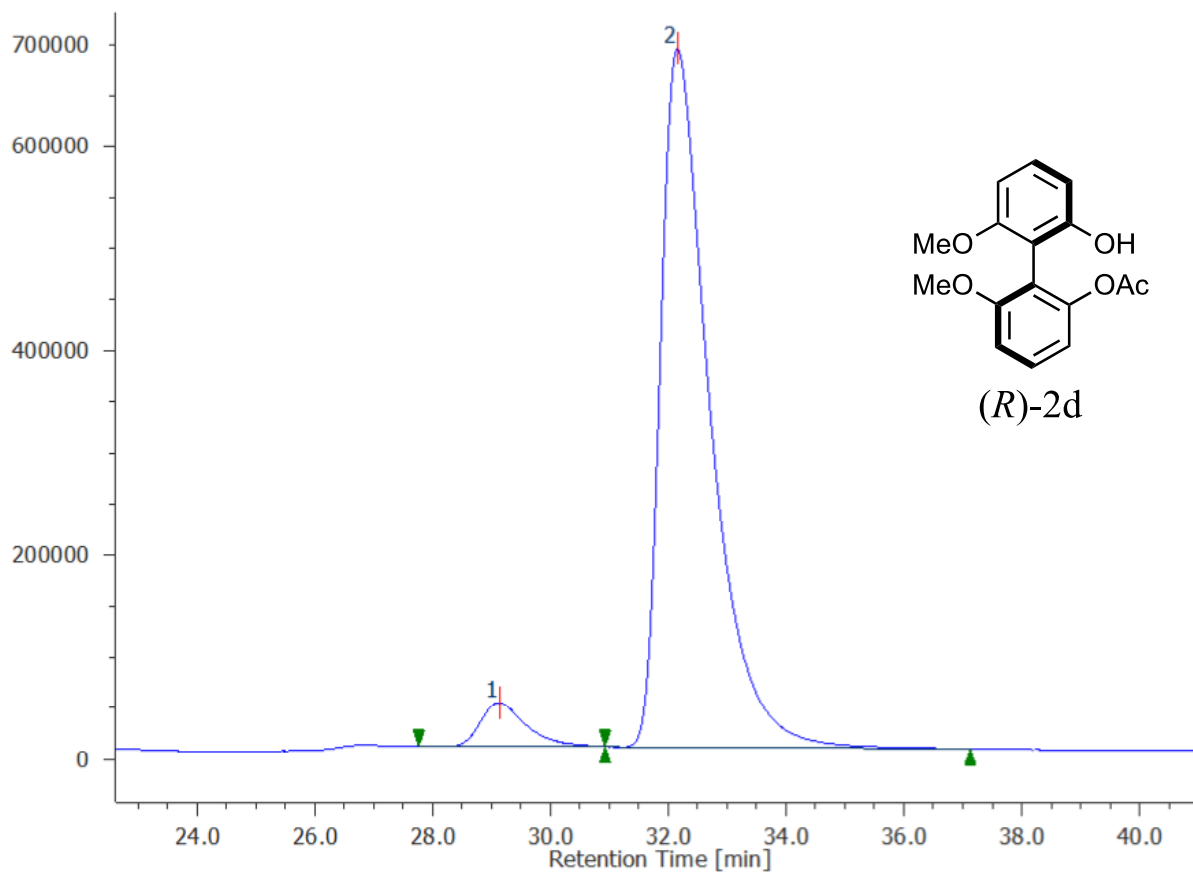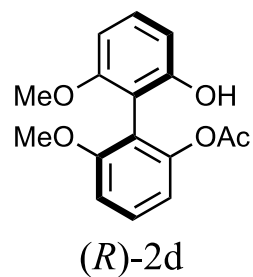

| # | ピーク名    | CH | tR [min] | 面積 [μV·sec] | 高さ [μV] | 面積%    | 高さ%    | 定量値 | NTP  | 分離度   | シメトリー係数 | 警告 |
|---|---------|----|----------|-------------|---------|--------|--------|-----|------|-------|---------|----|
| 1 | Unknown | 9  | 29.127   | 2278319     | 42397   | 5.427  | 5.843  | N/A | 7390 | 2.161 | 1.456   |    |
| 2 | Unknown | 9  | 32.150   | 39700334    | 683229  | 94.573 | 94.157 | N/A | 7867 | N/A   | 1.834   |    |

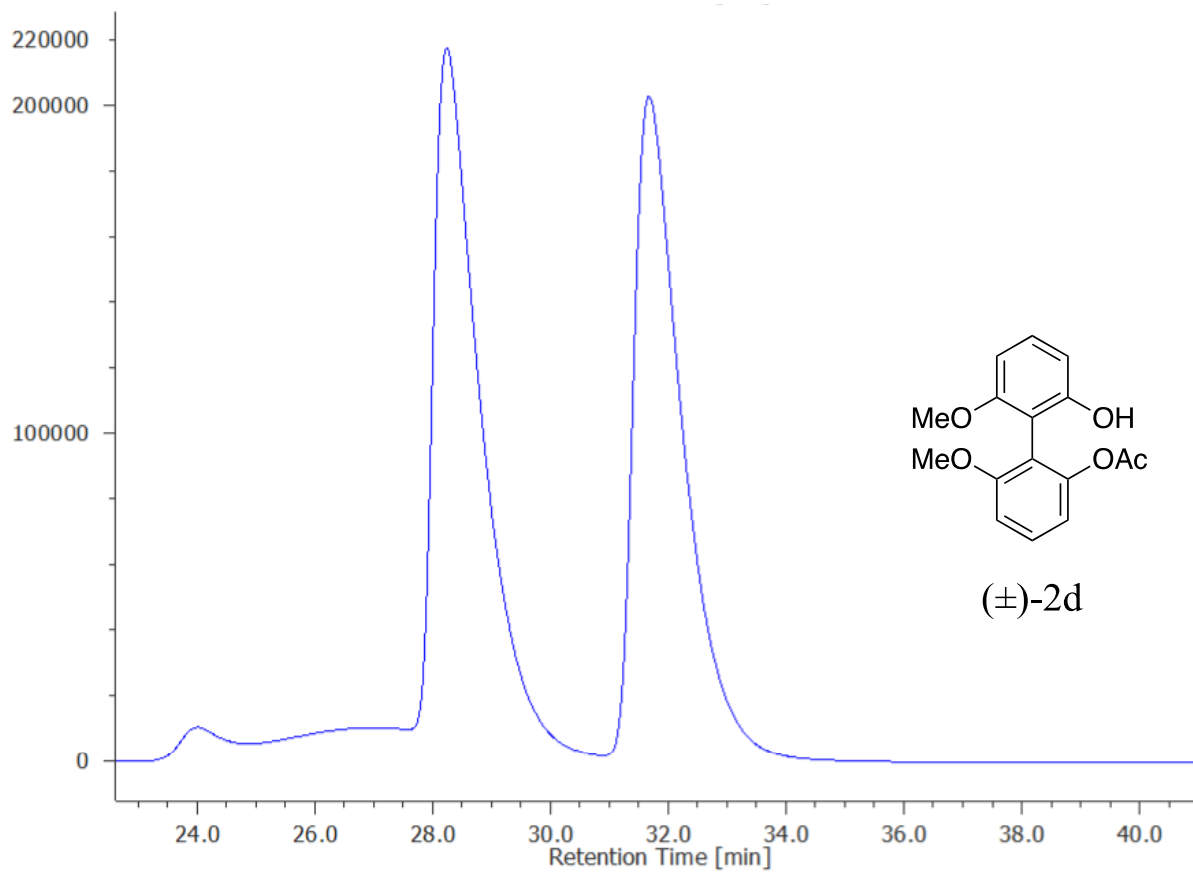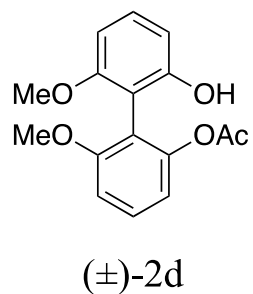

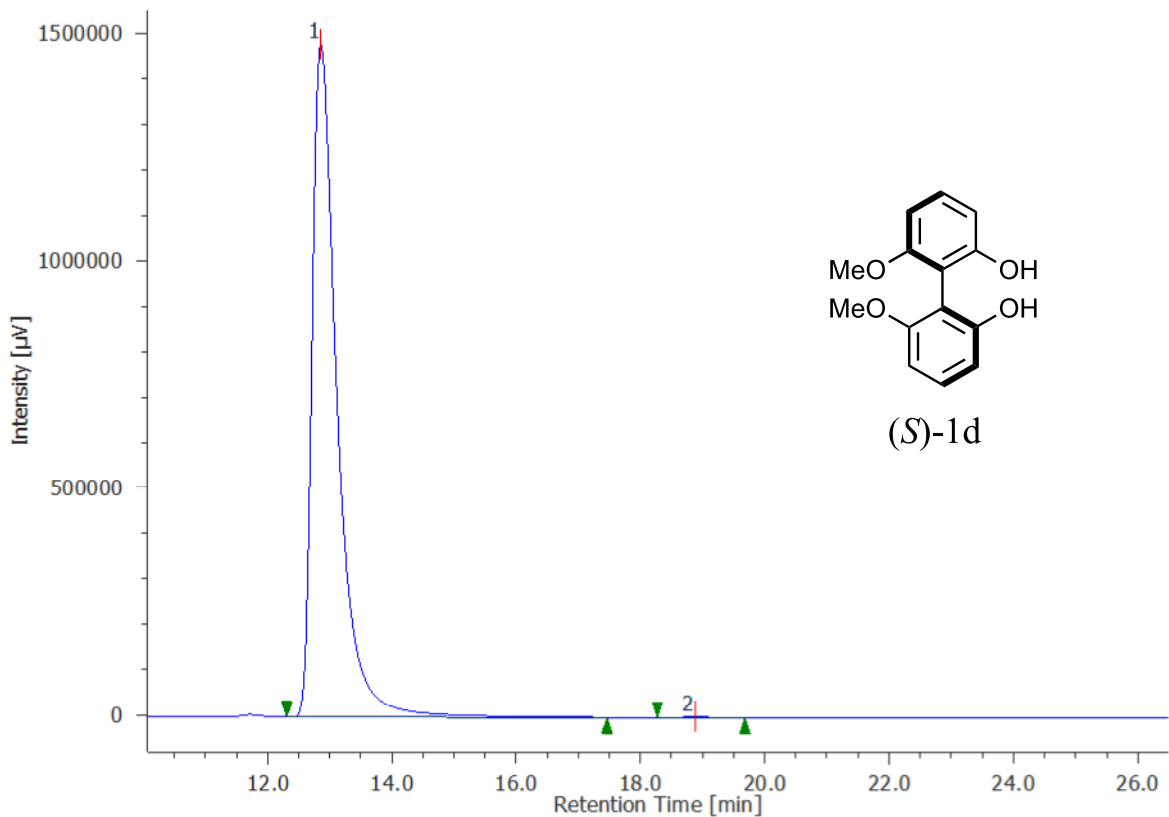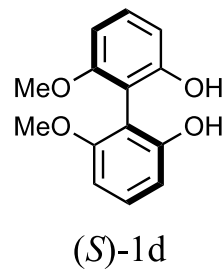

| # | ピーク名    | CH | tR [min] | 面積 [μV·sec] | 高さ [μV] | 面積%    | 高さ%    | 定量値 | NTP  | 分離度   | シンメトリー係数 | 警告 |
|---|---------|----|----------|-------------|---------|--------|--------|-----|------|-------|----------|----|
| 1 | Unknown | 9  | 12.857   | 41595458    | 1480102 | 99.899 | 99.923 | N/A | 5713 | 7.239 | 1.825    |    |
| 2 | Unknown | 9  | 18.877   | 42121       | 1140    | 0.101  | 0.077  | N/A | 5850 | N/A   | 1.169    |    |

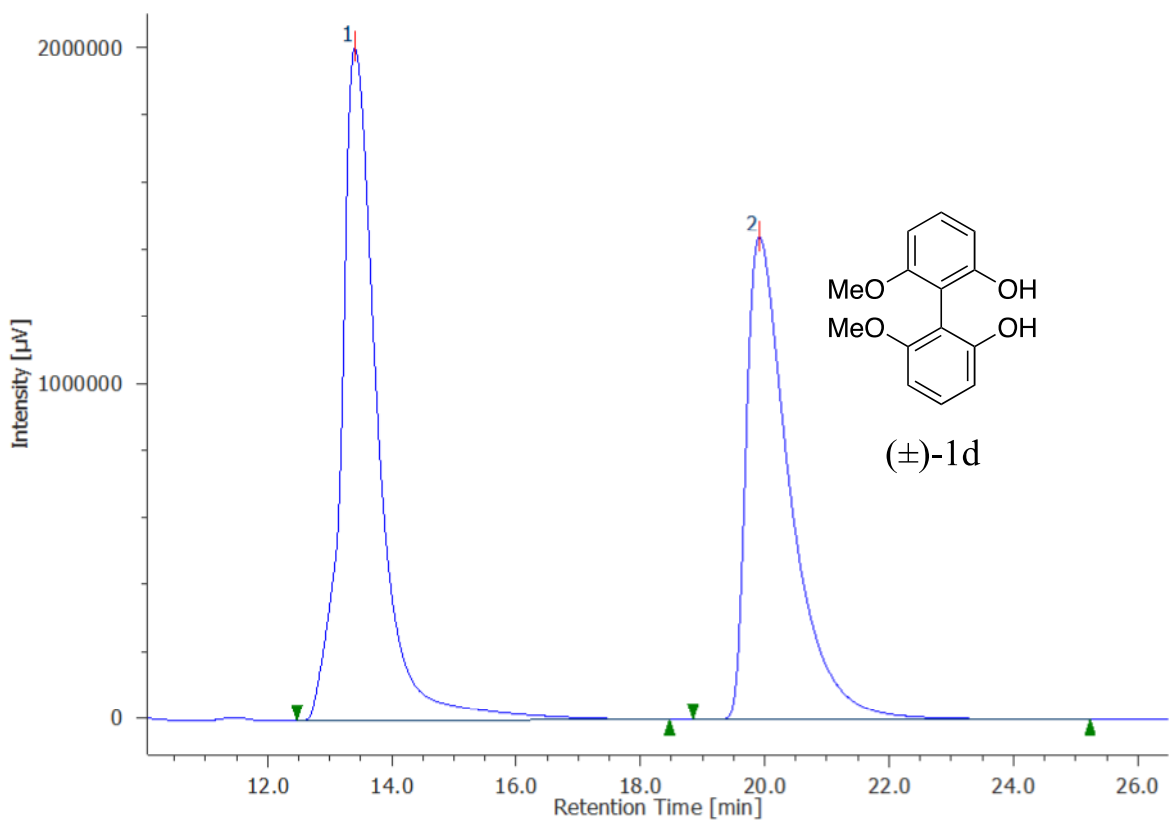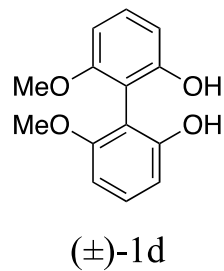

| # | ピーク名    | CH | tR [min] | 面積 [μV·sec] | 高さ [μV] | 面積%    | 高さ%    | 定量値 | NTP  | 分離度   | シンメトリー係数 | 警告 |
|---|---------|----|----------|-------------|---------|--------|--------|-----|------|-------|----------|----|
| 1 | Unknown | 9  | 13.403   | 81456823    | 2006547 | 53.731 | 58.230 | N/A | 3502 | 6.203 | 1.312    |    |
| 2 | Unknown | 9  | 19.913   | 70143878    | 1439324 | 46.269 | 41.770 | N/A | 4416 | N/A   | 2.236    |    |

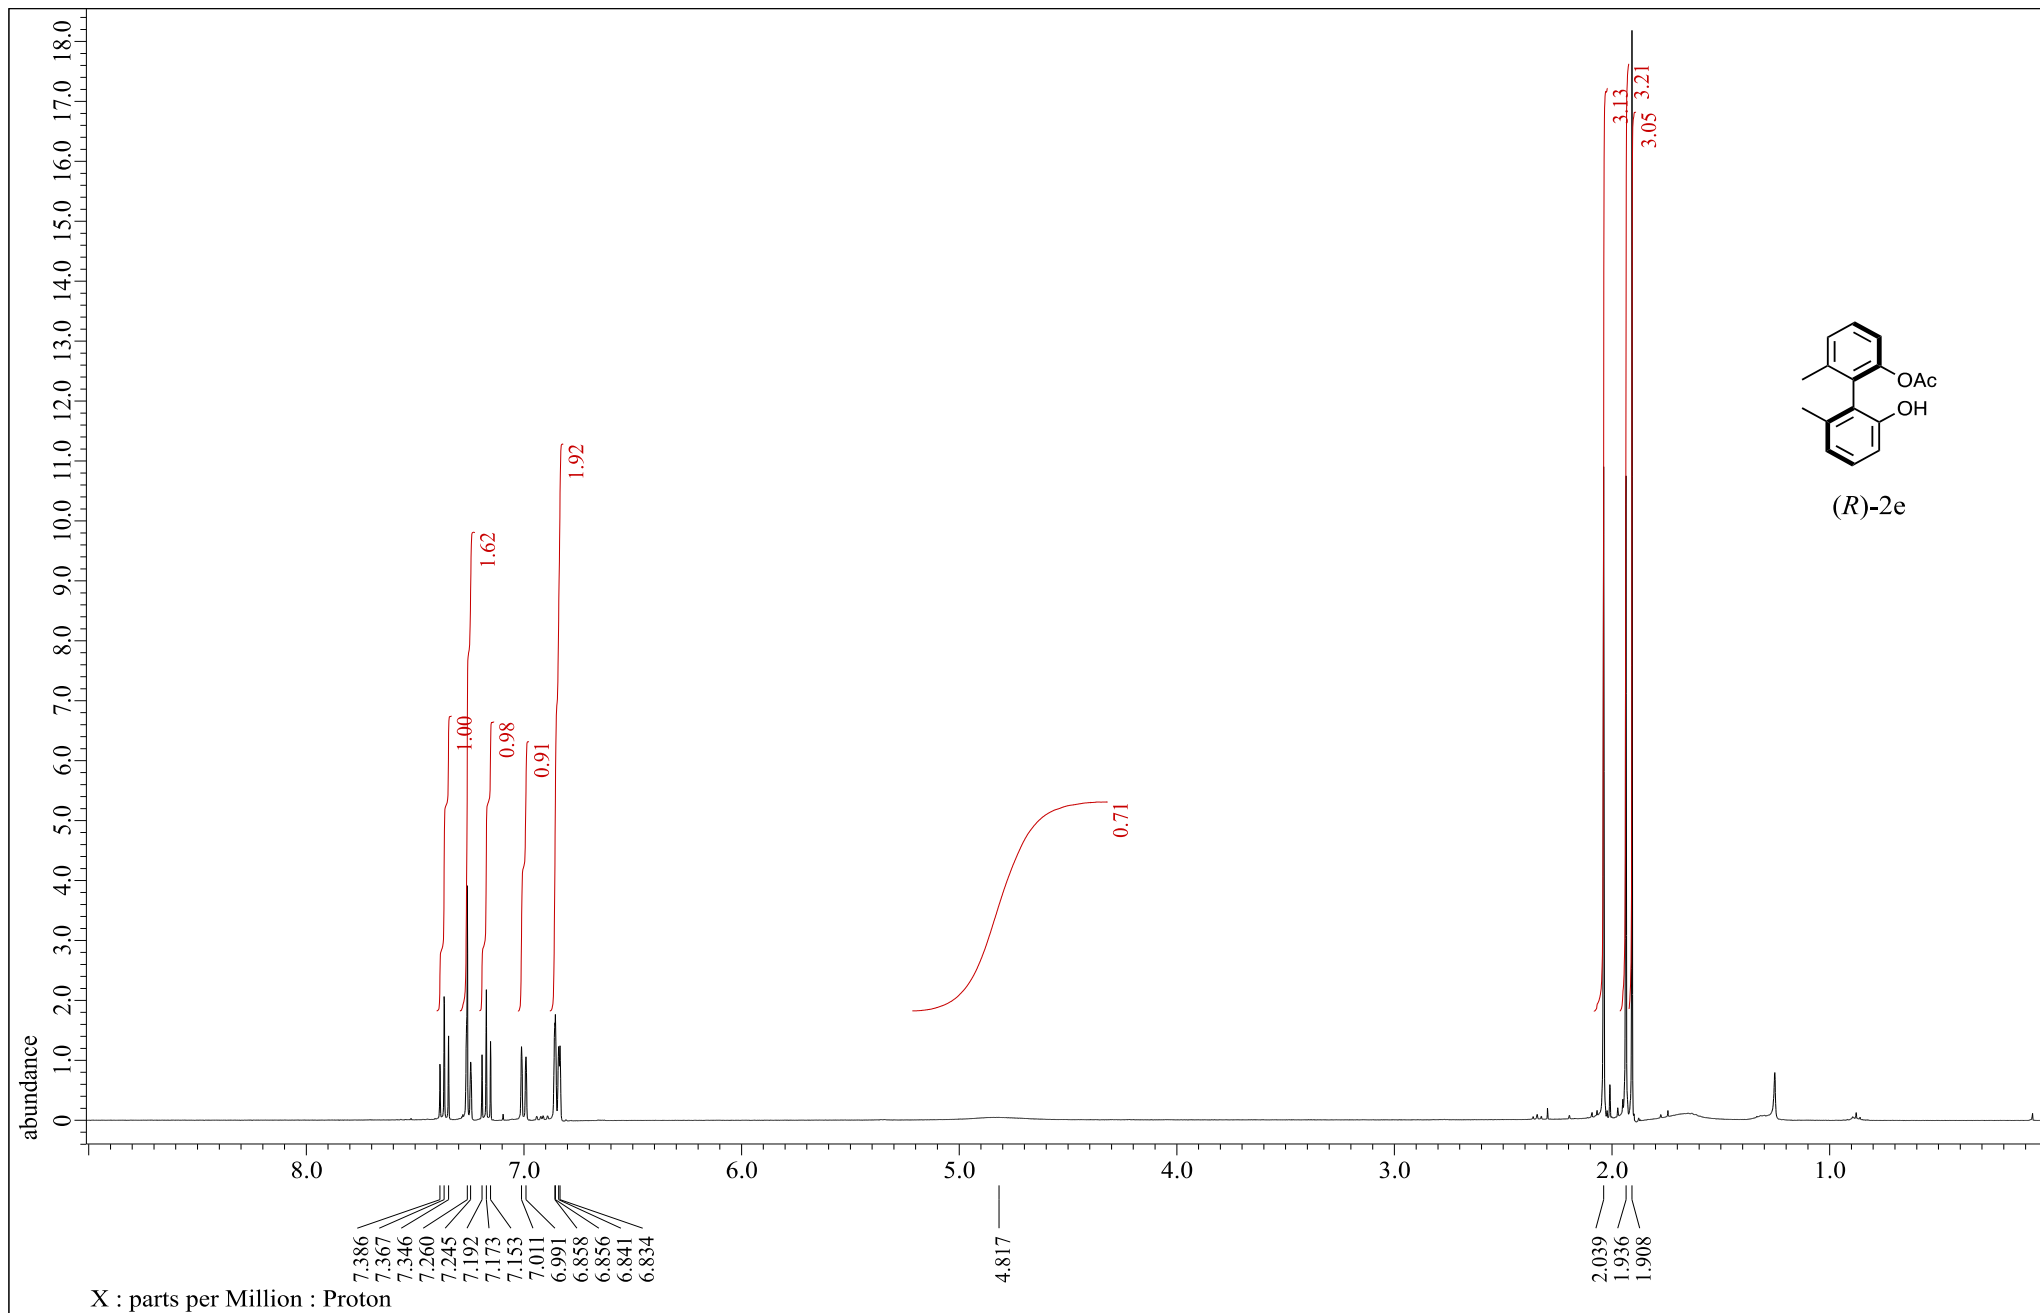

<sup>1</sup>H NMR spectrum (400 MHz, CDCl<sub>3</sub>) of (*R*)-2e

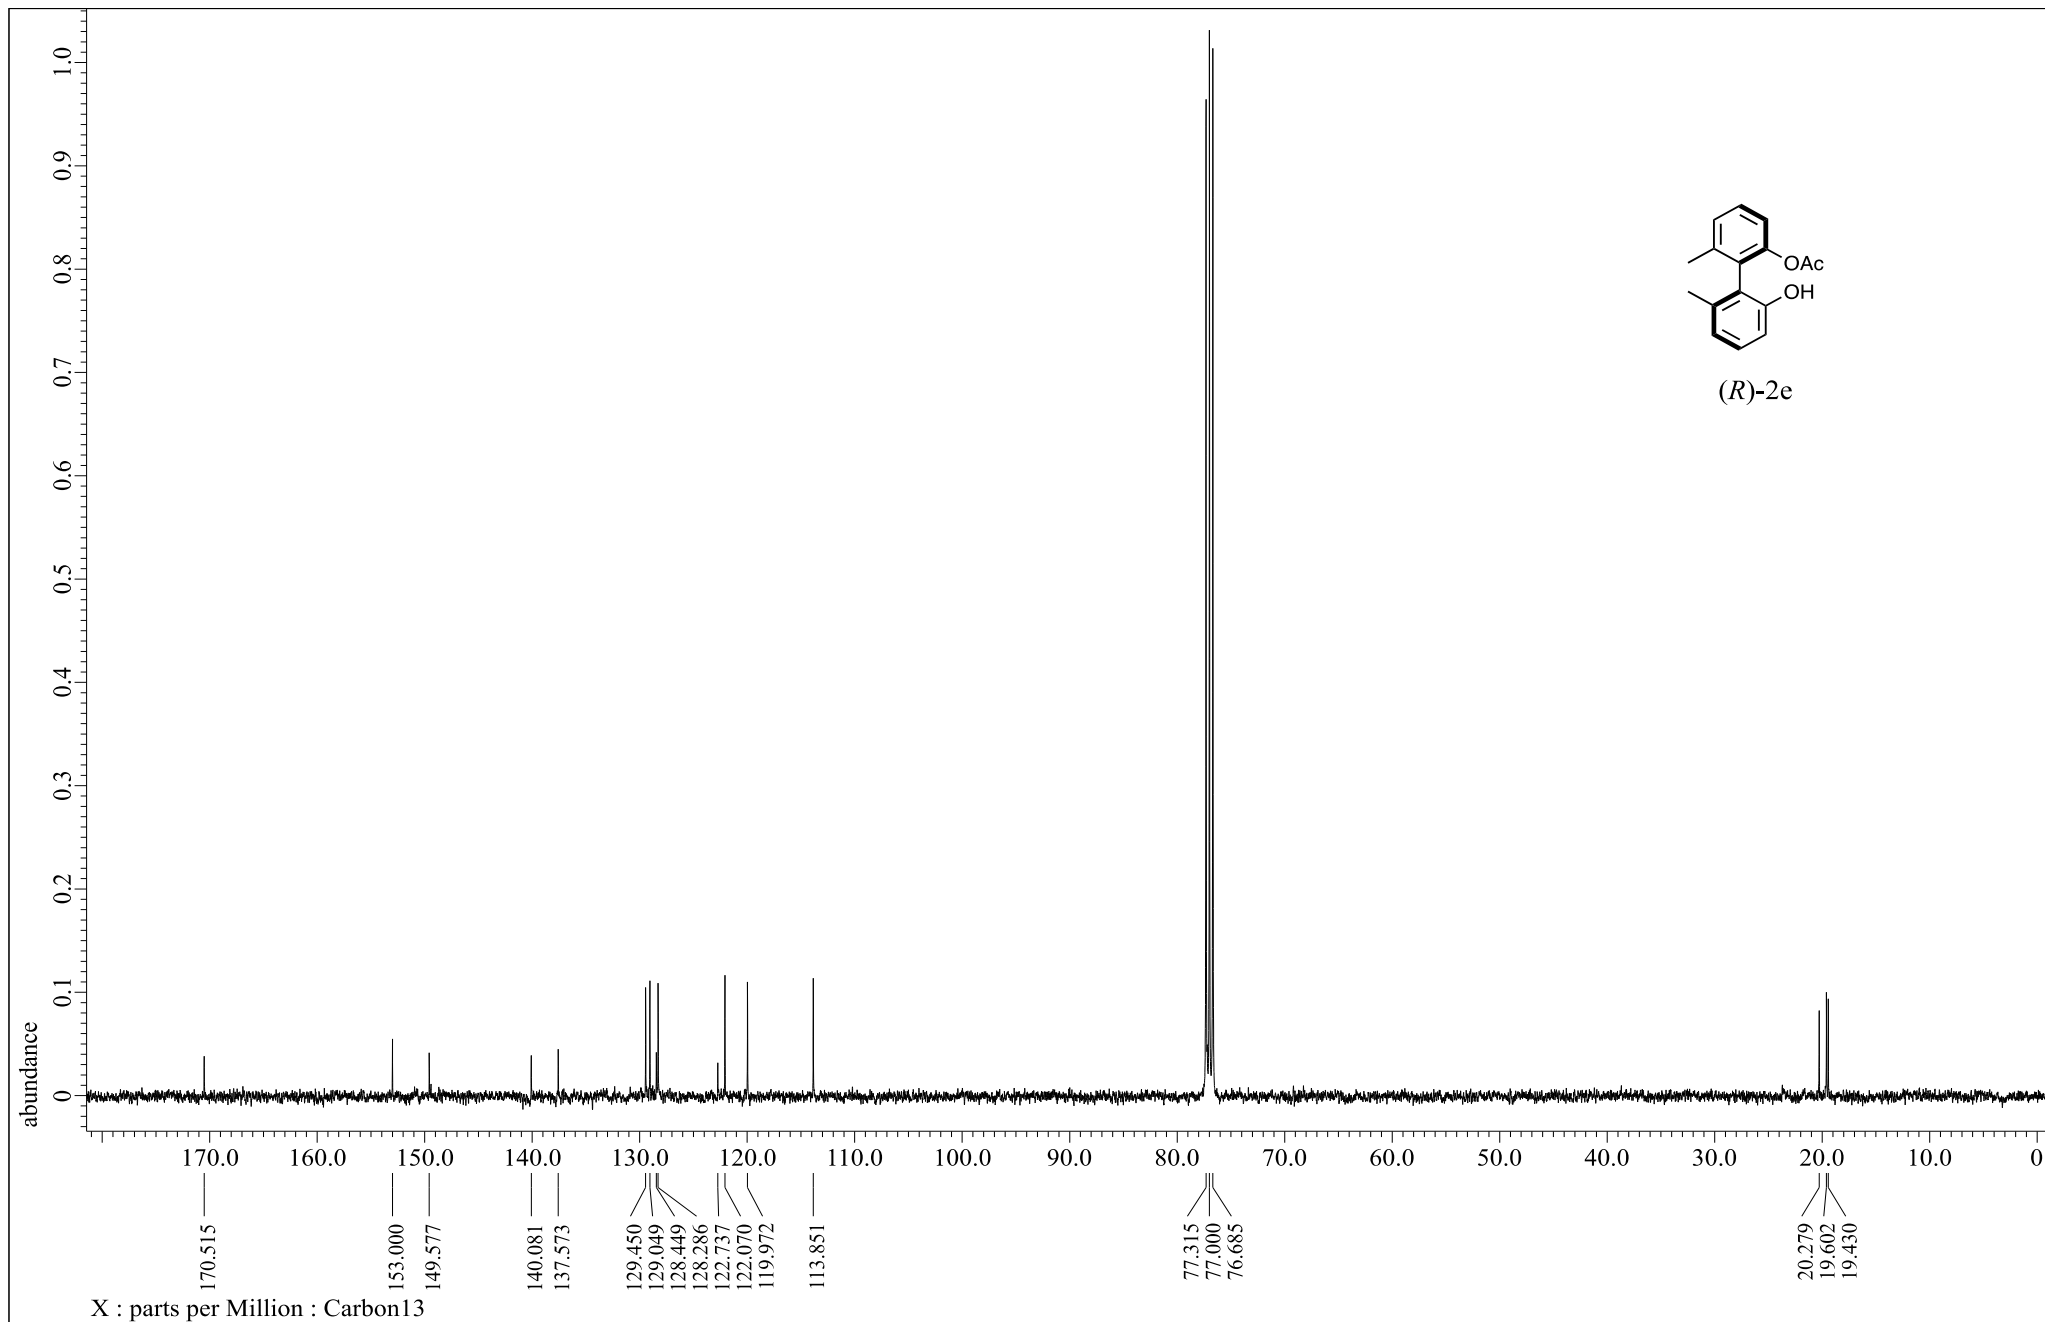

<sup>13</sup>C NMR spectrum (100 MHz, CDCl<sub>3</sub>) of *(R)*-2e

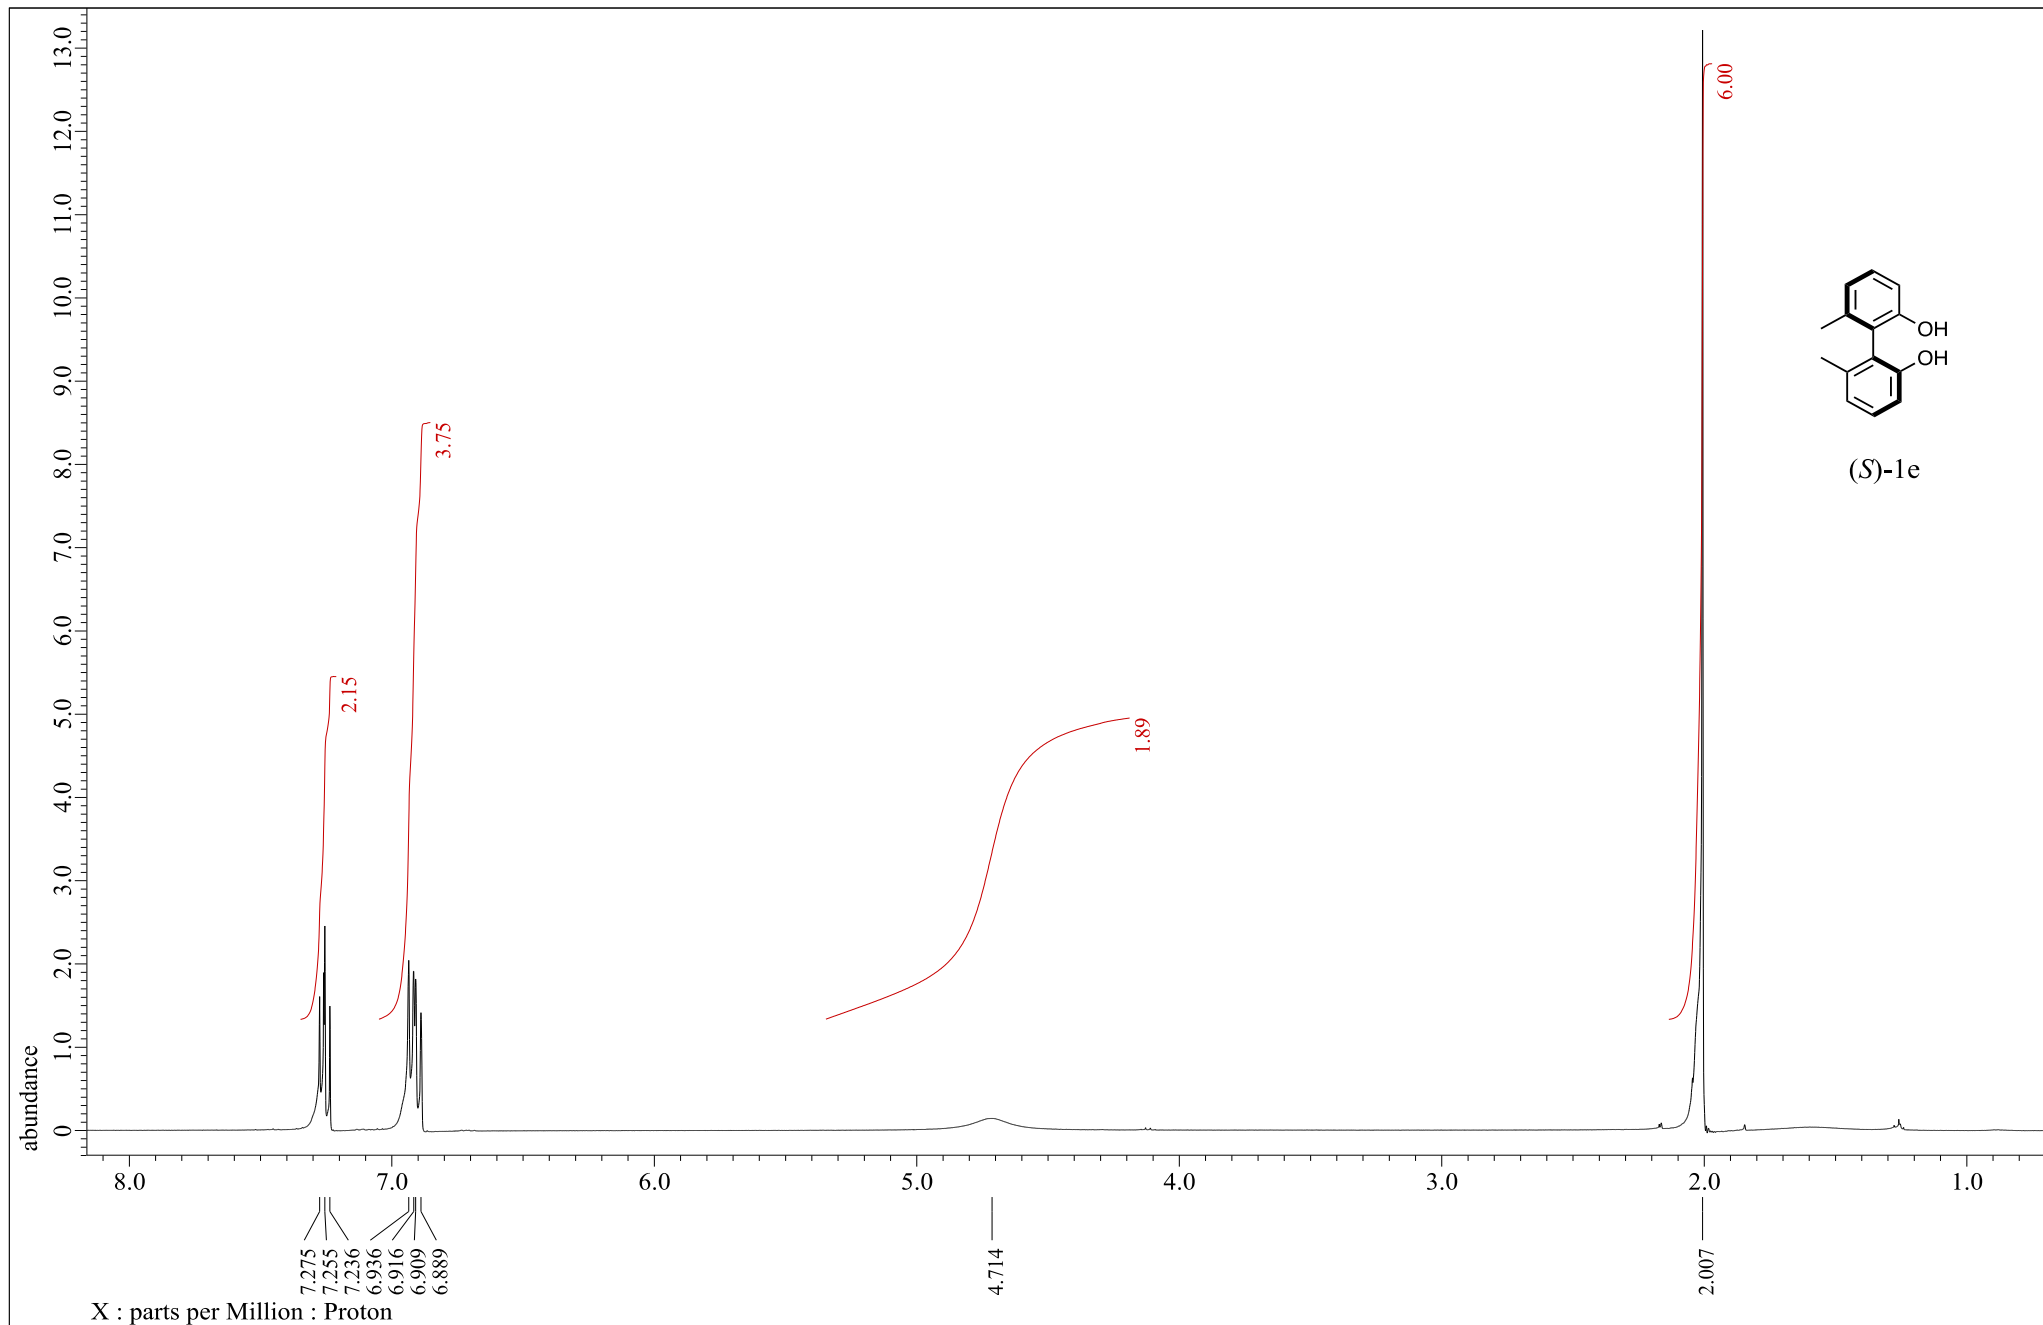

$^1\text{H}$  NMR spectrum (400 MHz,  $\text{CDCl}_3$ ) of (S)-1e

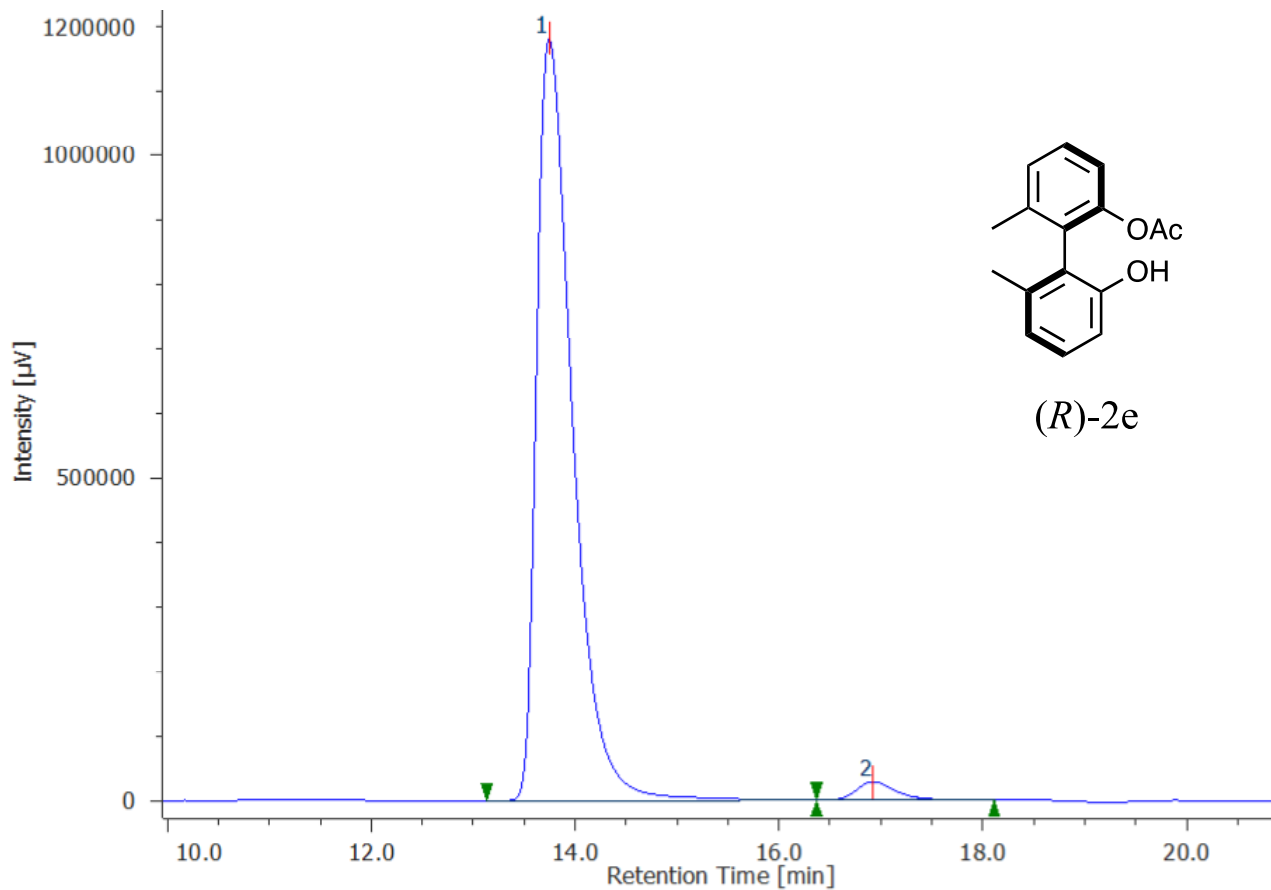

| # | ピーク名    | CH | tR [min] | 面積 [ $\mu\text{V}\cdot\text{sec}$ ] | 高さ [ $\mu\text{V}$ ] | 面積%    | 高さ%    | 定量値 | NTP  | 分離度   | シンメトリー係数 | 警告 |
|---|---------|----|----------|-------------------------------------|----------------------|--------|--------|-----|------|-------|----------|----|
| 1 | Unknown | 9  | 13.743   | 28930516                            | 1180747              | 97.465 | 97.713 | N/A | 7870 | 4.904 | 1.753    |    |
| 2 | Unknown | 9  | 16.923   | 752519                              | 27641                | 2.535  | 2.287  | N/A | 9887 | N/A   | 1.355    |    |

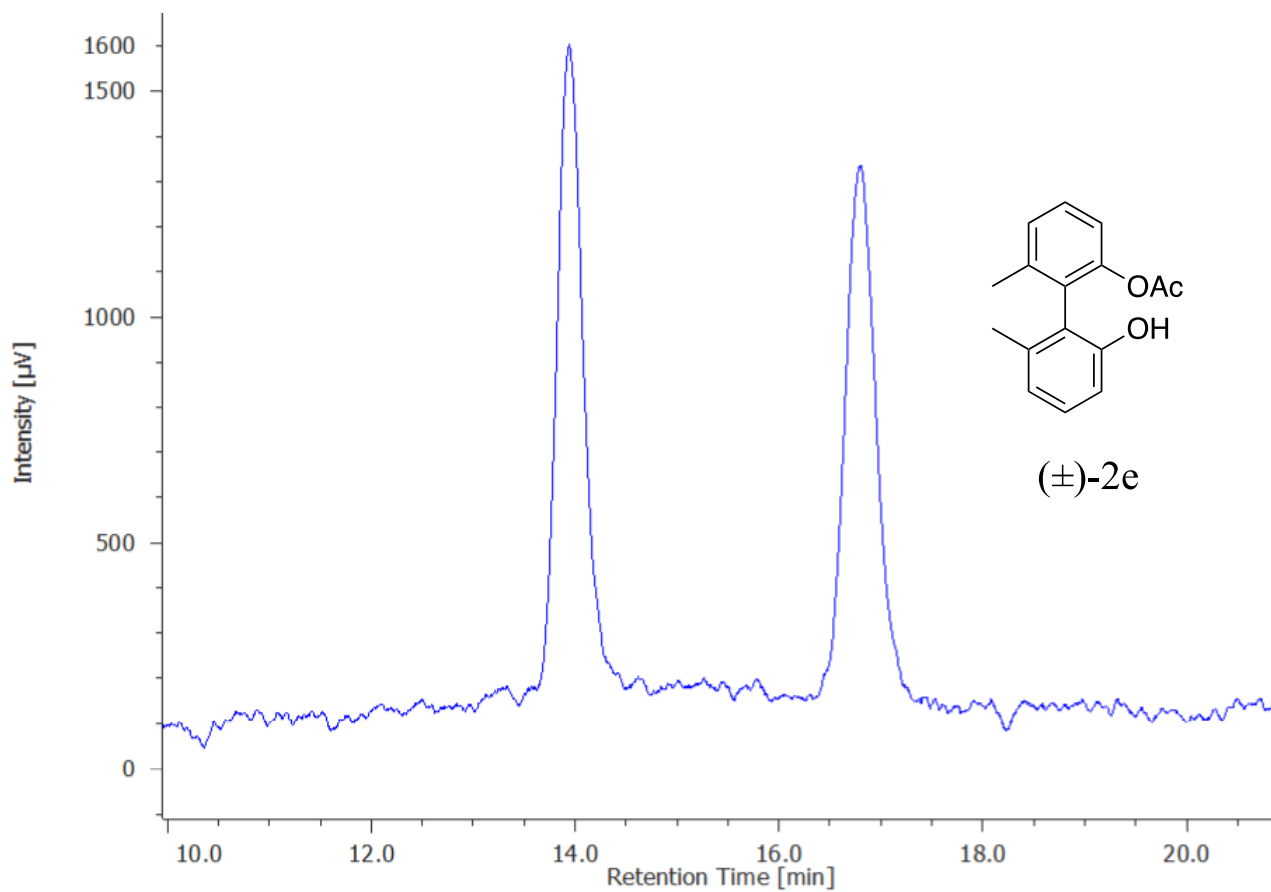

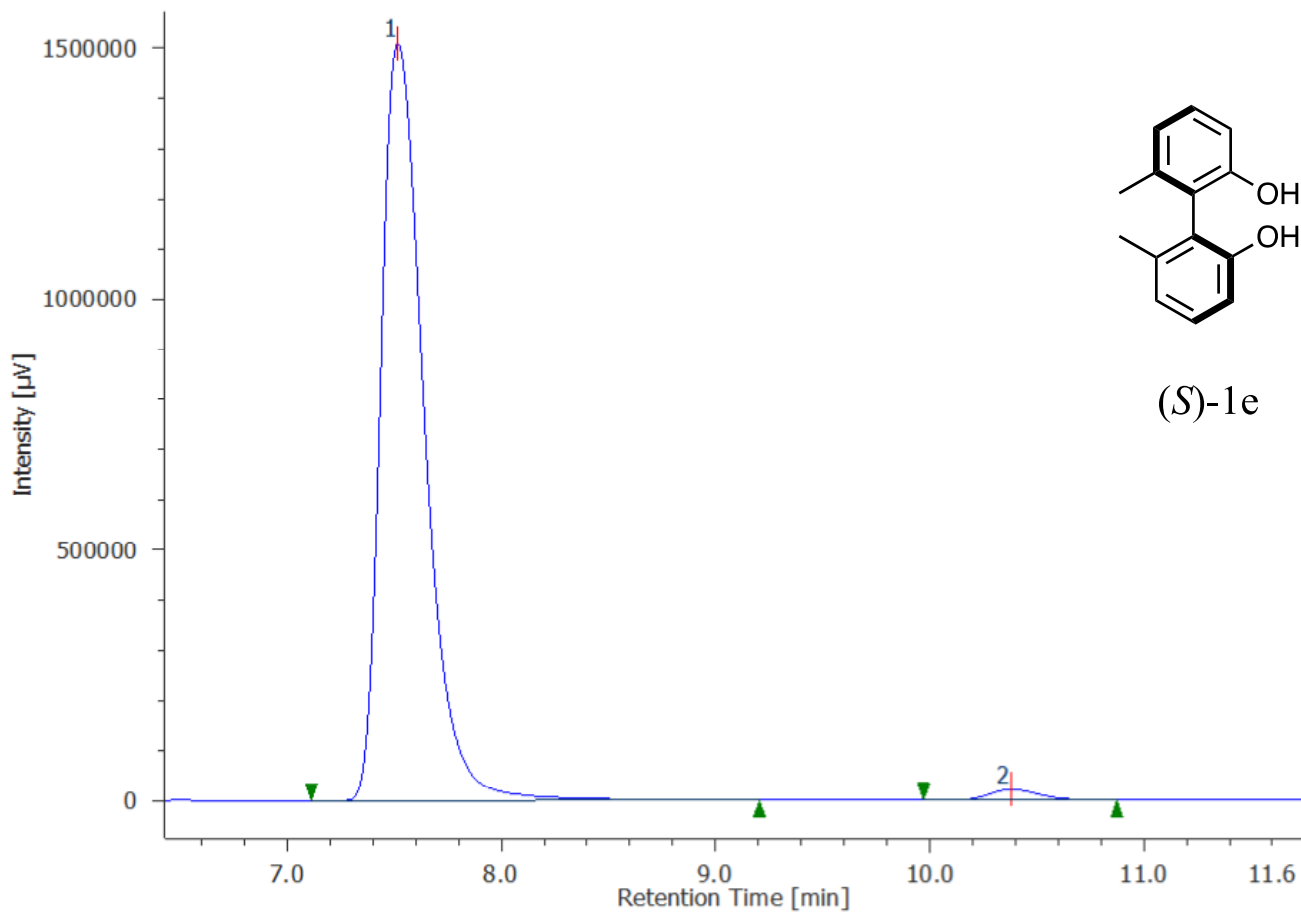

| # | ピーク名    | CH | tR [min] | 面積 [ $\mu\text{V}\cdot\text{sec}$ ] | 高さ [ $\mu\text{V}$ ] | 面積%    | 高さ%    | 定量値 | NTP  | 分離度   | シメトリ係数 | 警告 |
|---|---------|----|----------|-------------------------------------|----------------------|--------|--------|-----|------|-------|--------|----|
| 1 | Unknown | 9  | 7.517    | 21189661                            | 1507116              | 98.353 | 98.588 | N/A | 7035 | 7.304 | 1.470  |    |
| 2 | Unknown | 9  | 10.380   | 354942                              | 21582                | 1.647  | 1.412  | N/A | 9427 | N/A   | 1.239  |    |

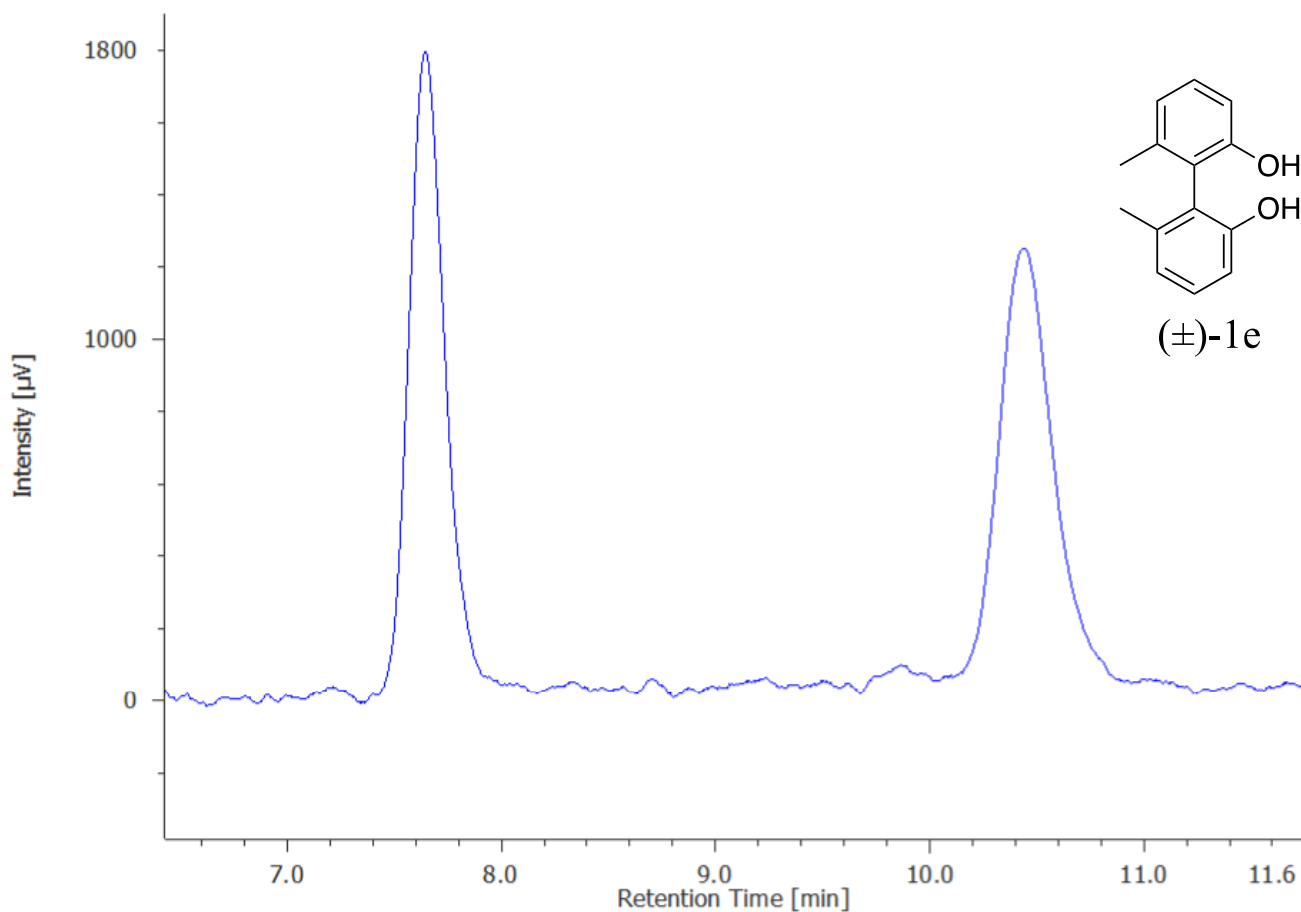



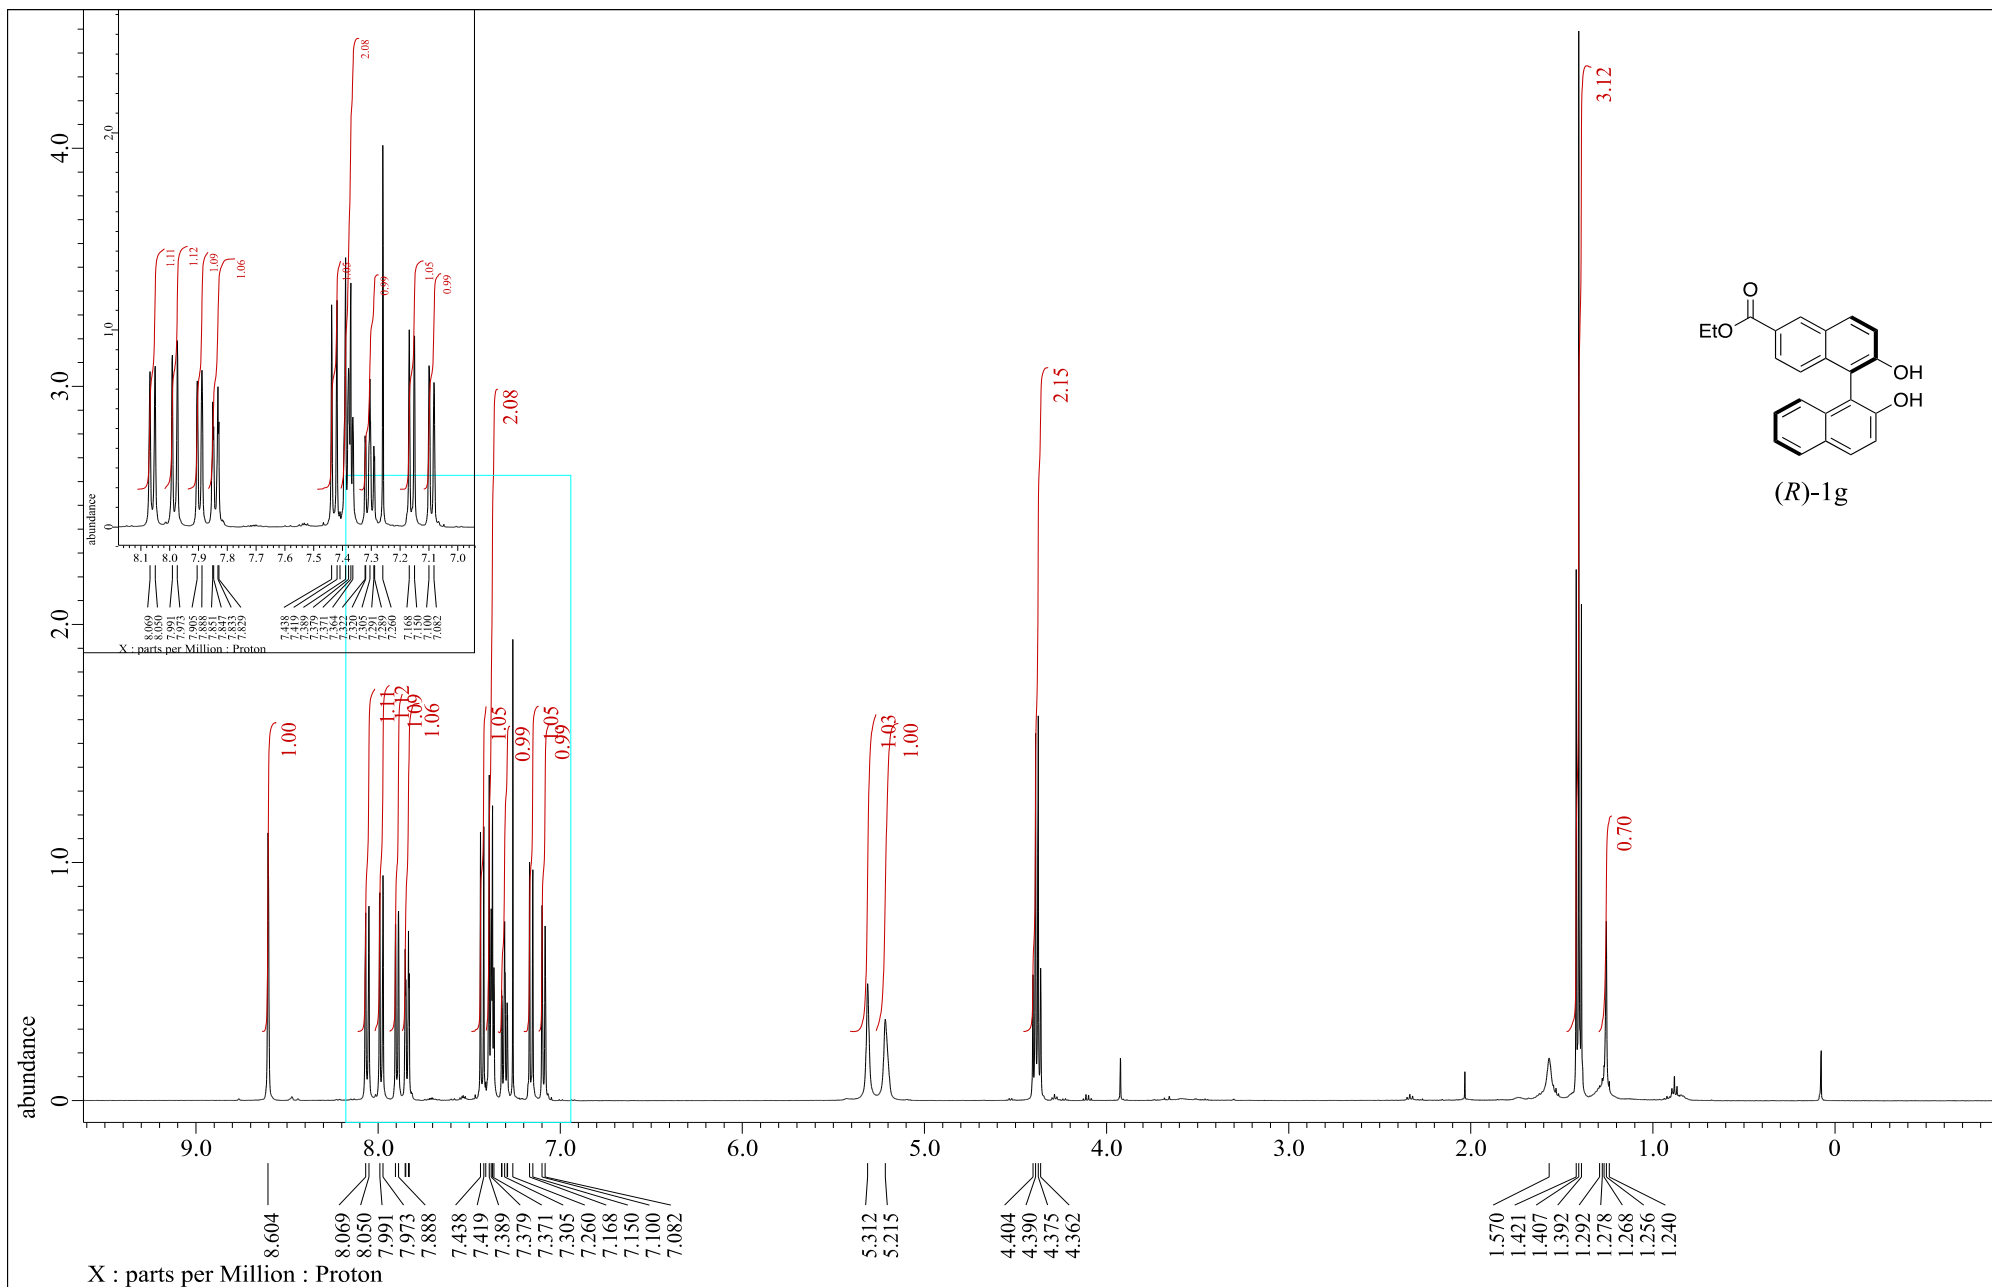

<sup>1</sup>H NMR spectrum (500 MHz, CDCl<sub>3</sub>) of *(R)*-1g

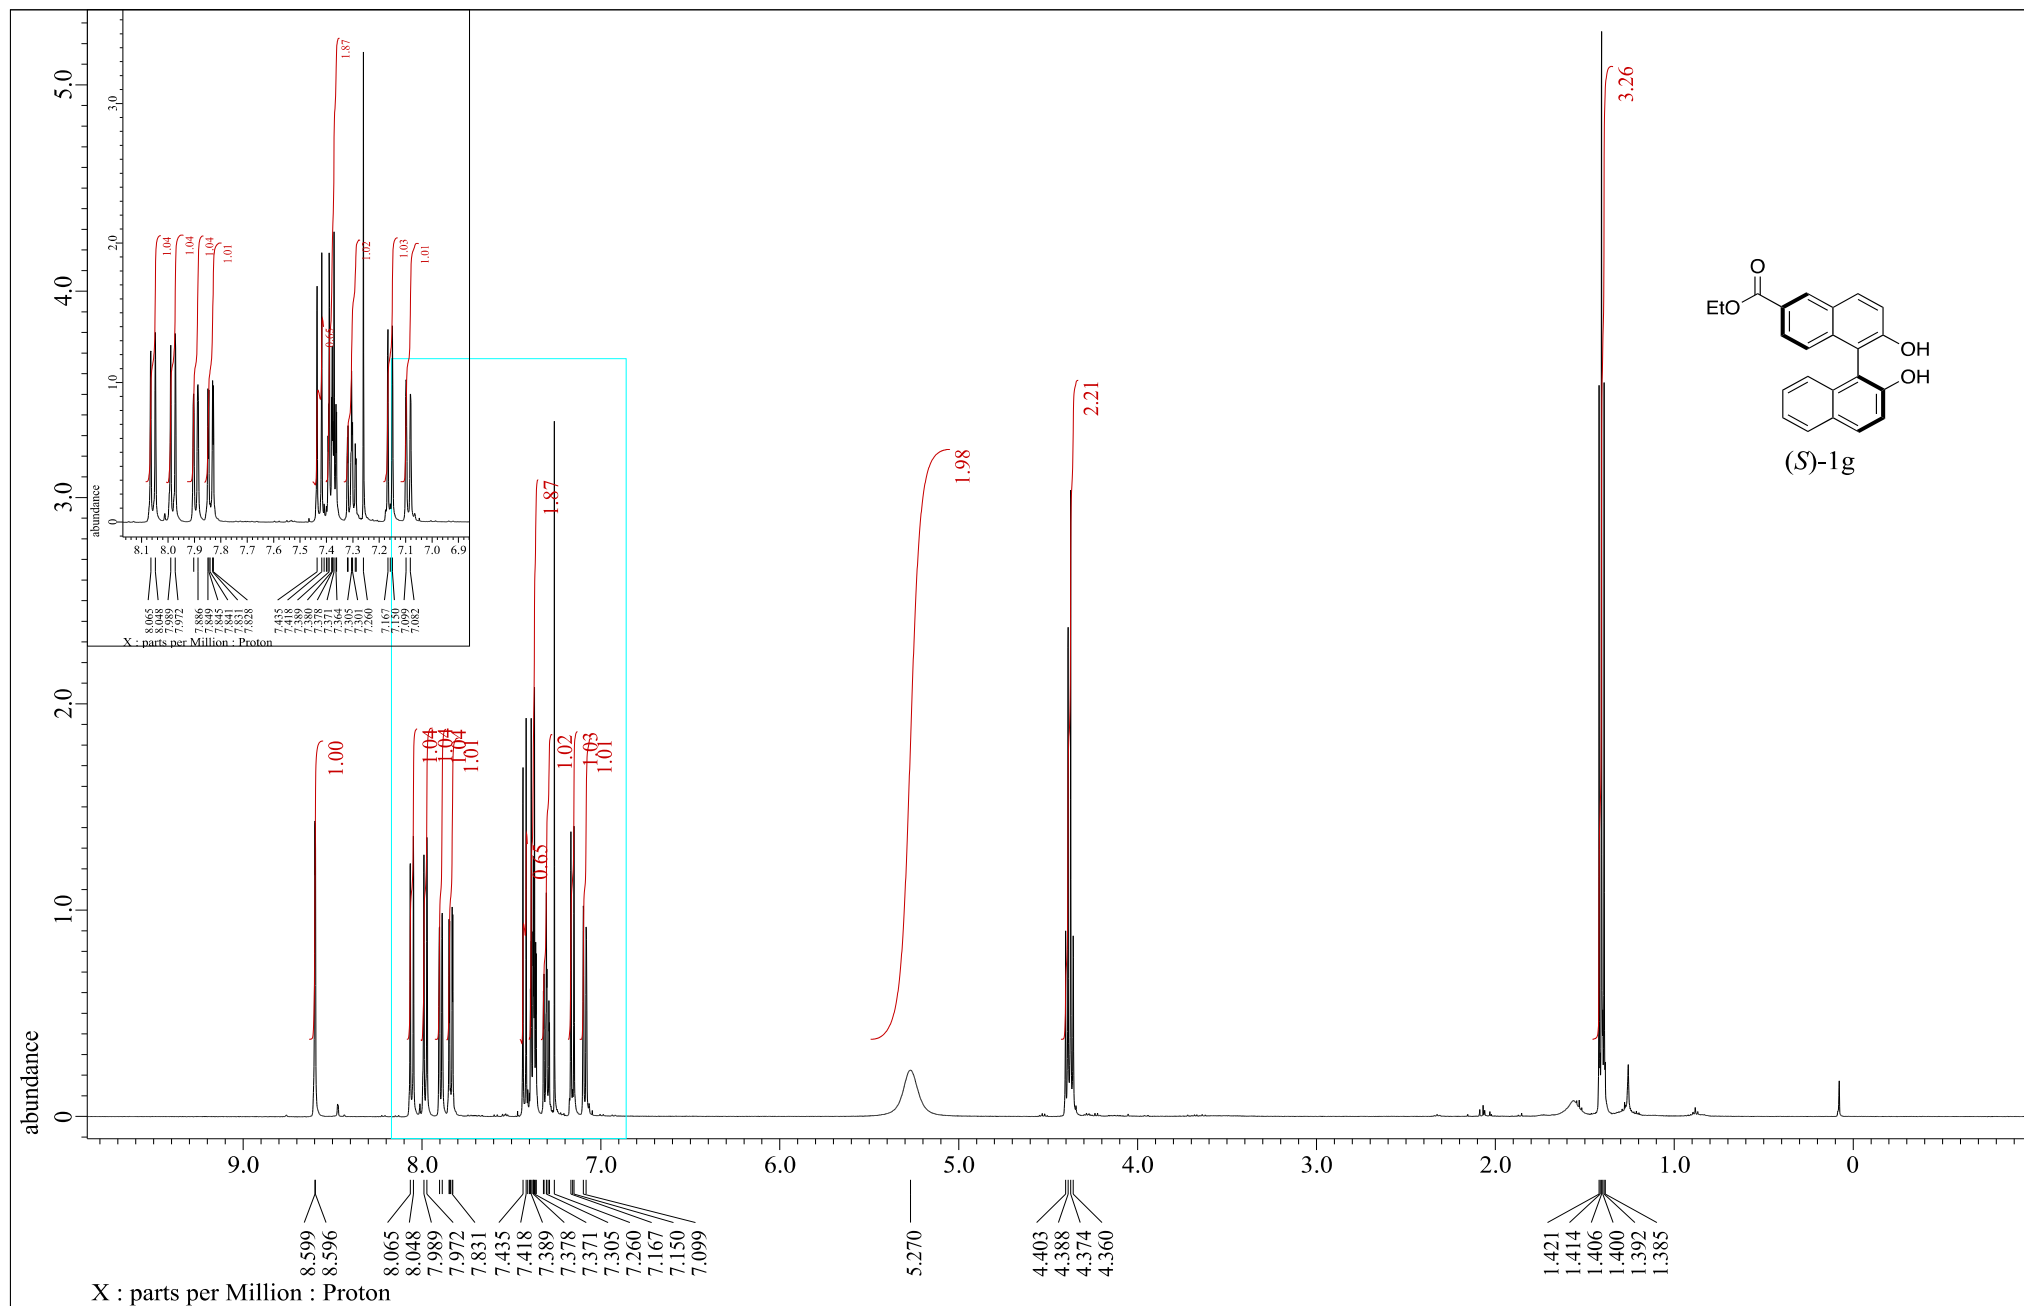

<sup>1</sup>H NMR spectrum (500 MHz, CDCl<sub>3</sub>) of (S)-1g

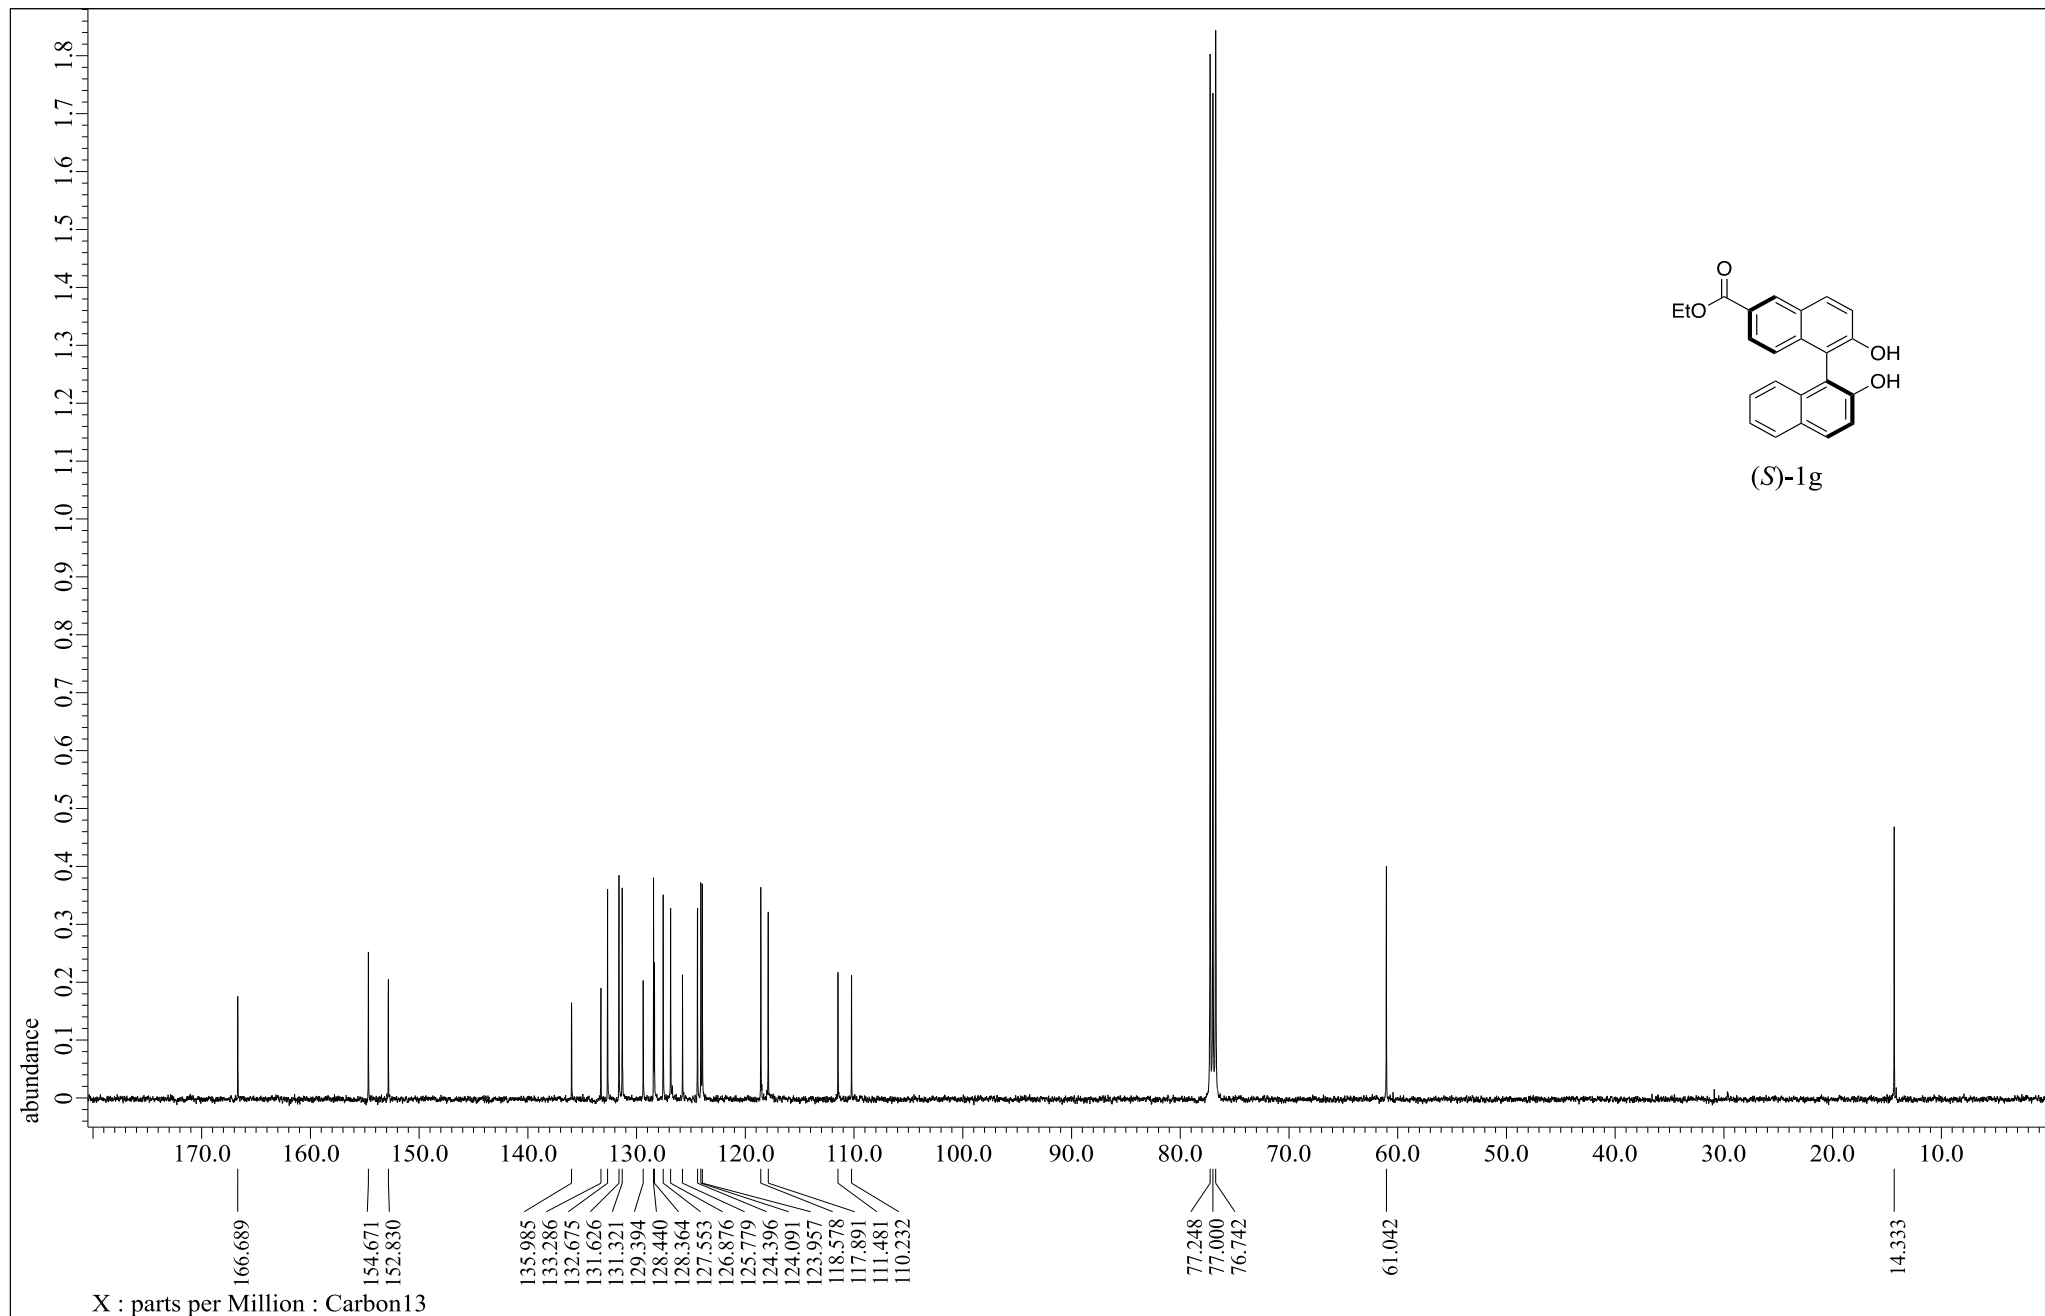

$^{13}\text{C}$  NMR spectrum (125 MHz,  $\text{CDCl}_3$ ) of (S)-1g

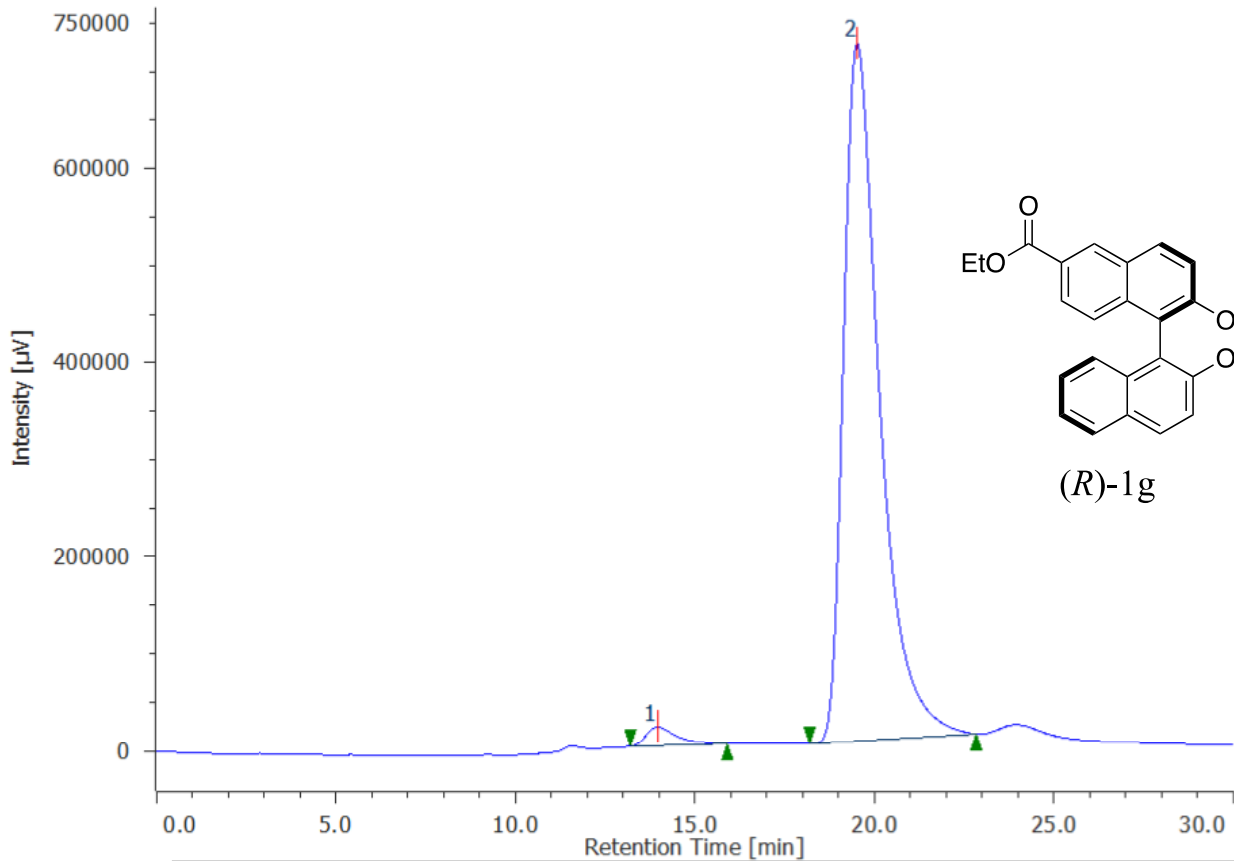

| # | ピーク名    | CH | tR [min] | 面積 [μV·sec] | 高さ [μV] | 面積%    | 高さ%    | 定量値 | NTP  | 分離度   | シンメトリー係数 | 警告 |
|---|---------|----|----------|-------------|---------|--------|--------|-----|------|-------|----------|----|
| 1 | Unknown | 9  | 13.967   | 1106405     | 19053   | 2.155  | 2.580  | N/A | 1477 | 3.484 | 1.638    |    |
| 2 | Unknown | 9  | 19.520   | 50245907    | 719391  | 97.845 | 97.420 | N/A | 2006 | N/A   | 1.678    |    |

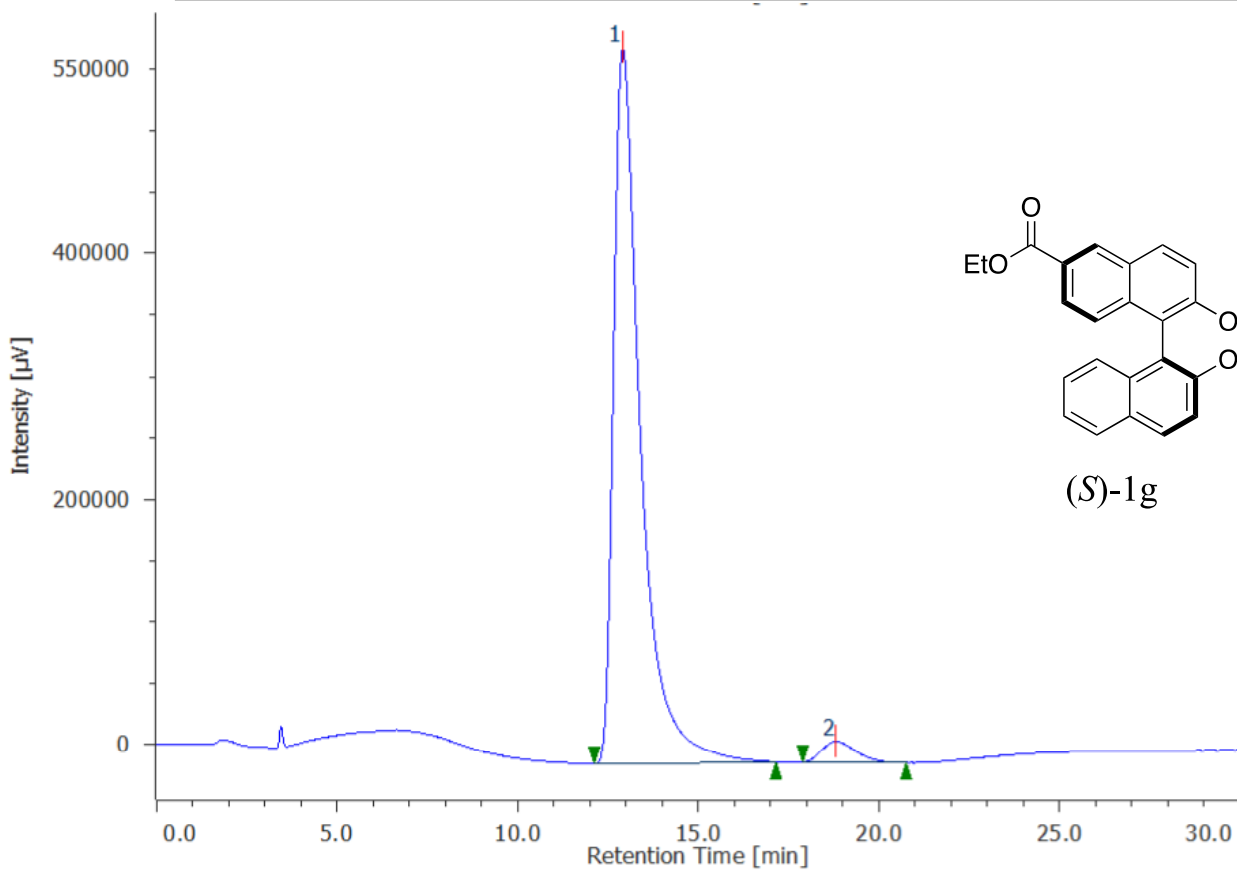

| # | ピーク名    | CH | tR [min] | 面積 [μV·sec] | 高さ [μV] | 面積%    | 高さ%    | 定量値 | NTP  | 分離度   | シンメトリー係数 | 警告 |
|---|---------|----|----------|-------------|---------|--------|--------|-----|------|-------|----------|----|
| 1 | Unknown | 9  | 12.913   | 30325295    | 581986  | 96.485 | 97.178 | N/A | 1739 | 3.989 | 1.977    |    |
| 2 | Unknown | 9  | 18.810   | 1104769     | 16898   | 3.515  | 2.822  | N/A | 1902 | N/A   | 1.369    |    |

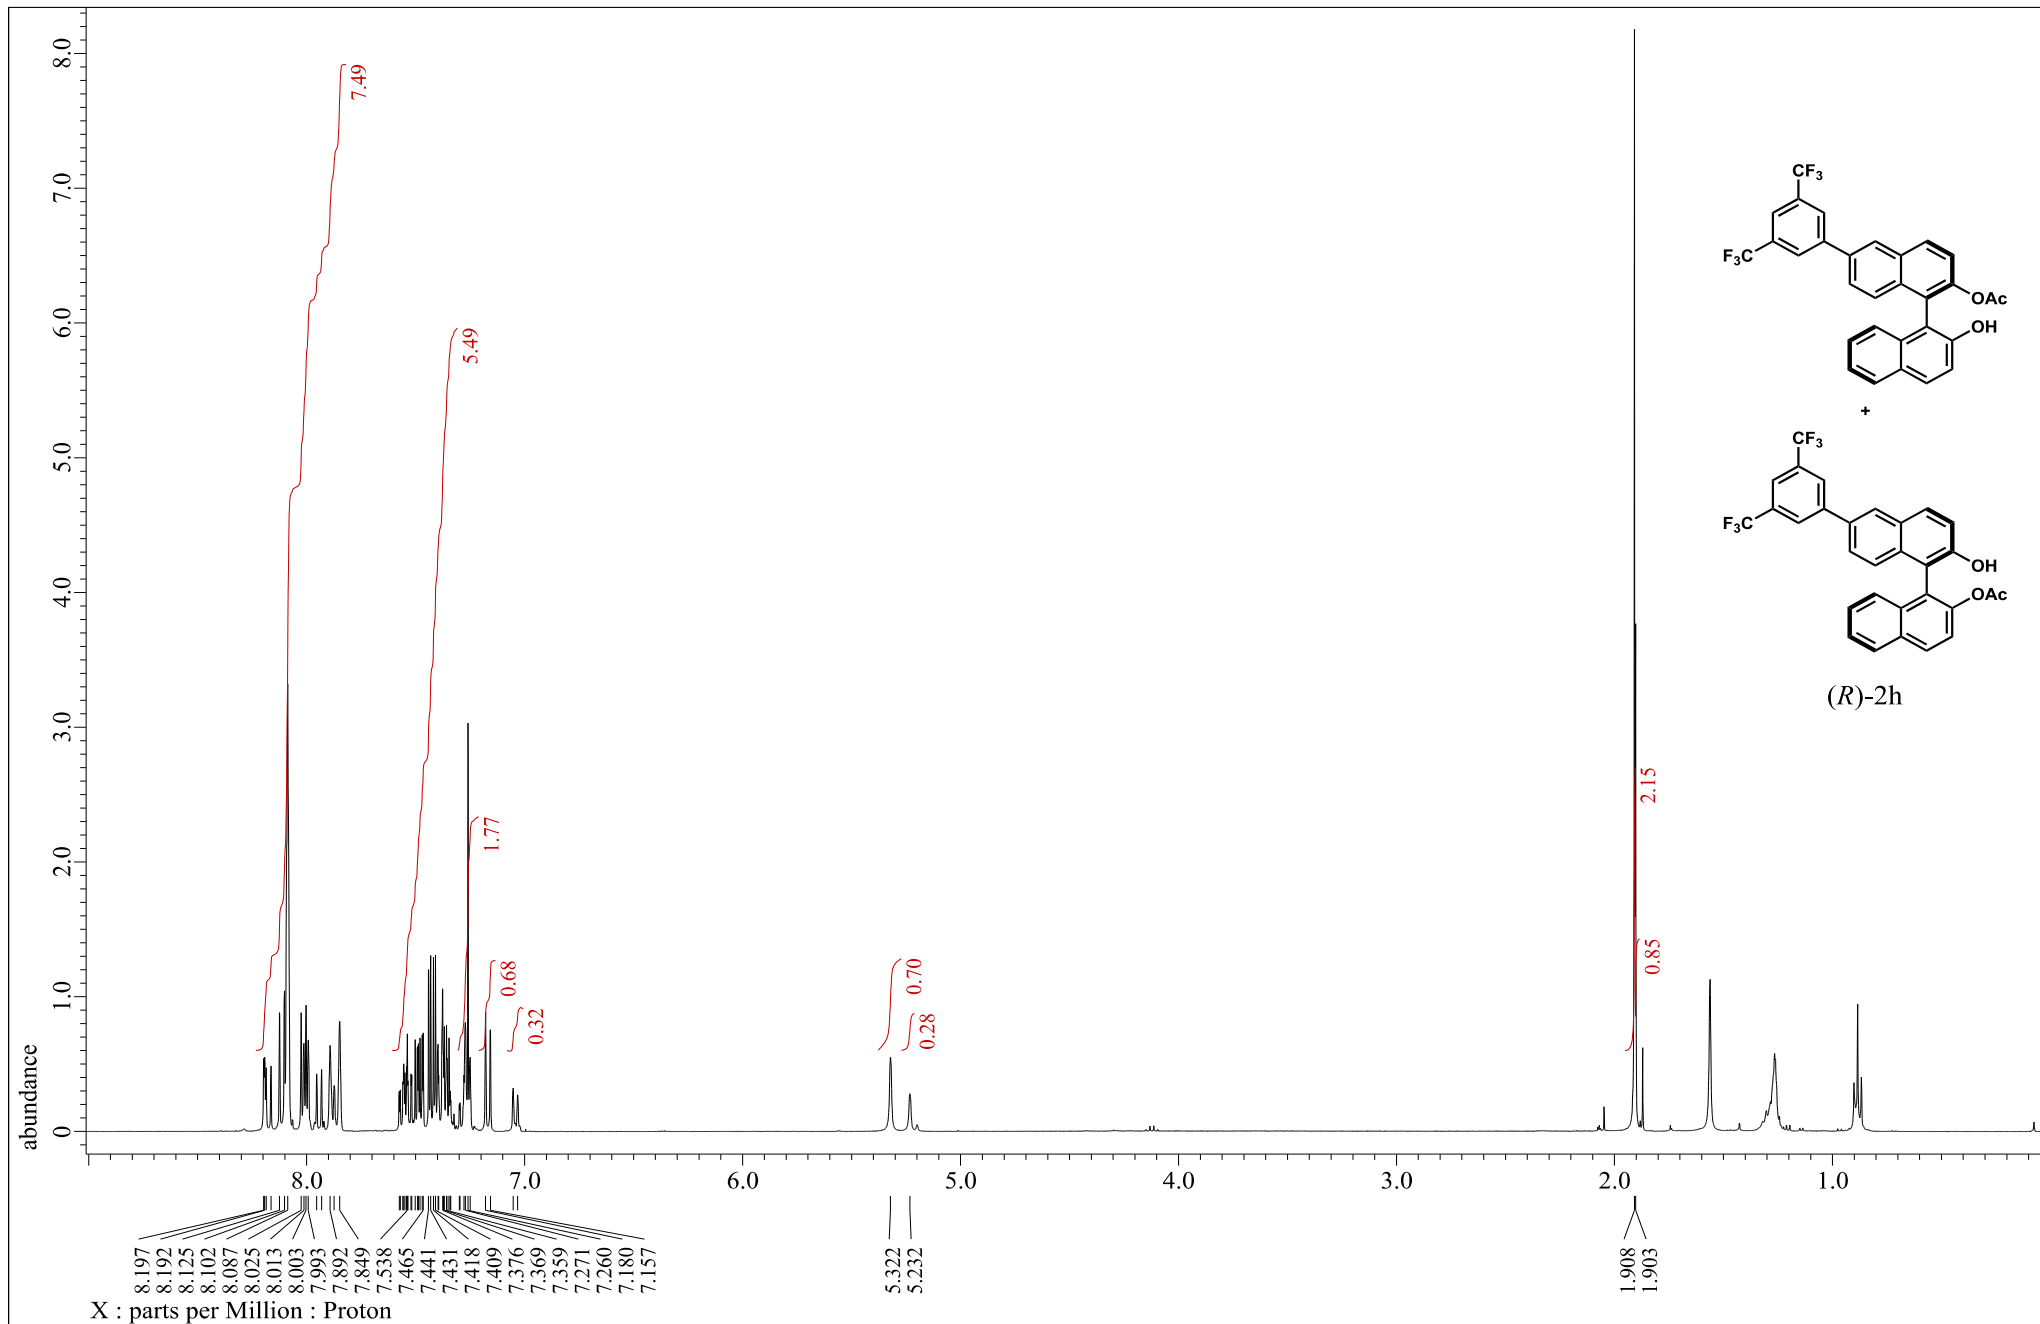

$^1\text{H}$  NMR spectra (400 MHz,  $\text{CDCl}_3$ ) of (R)-2h

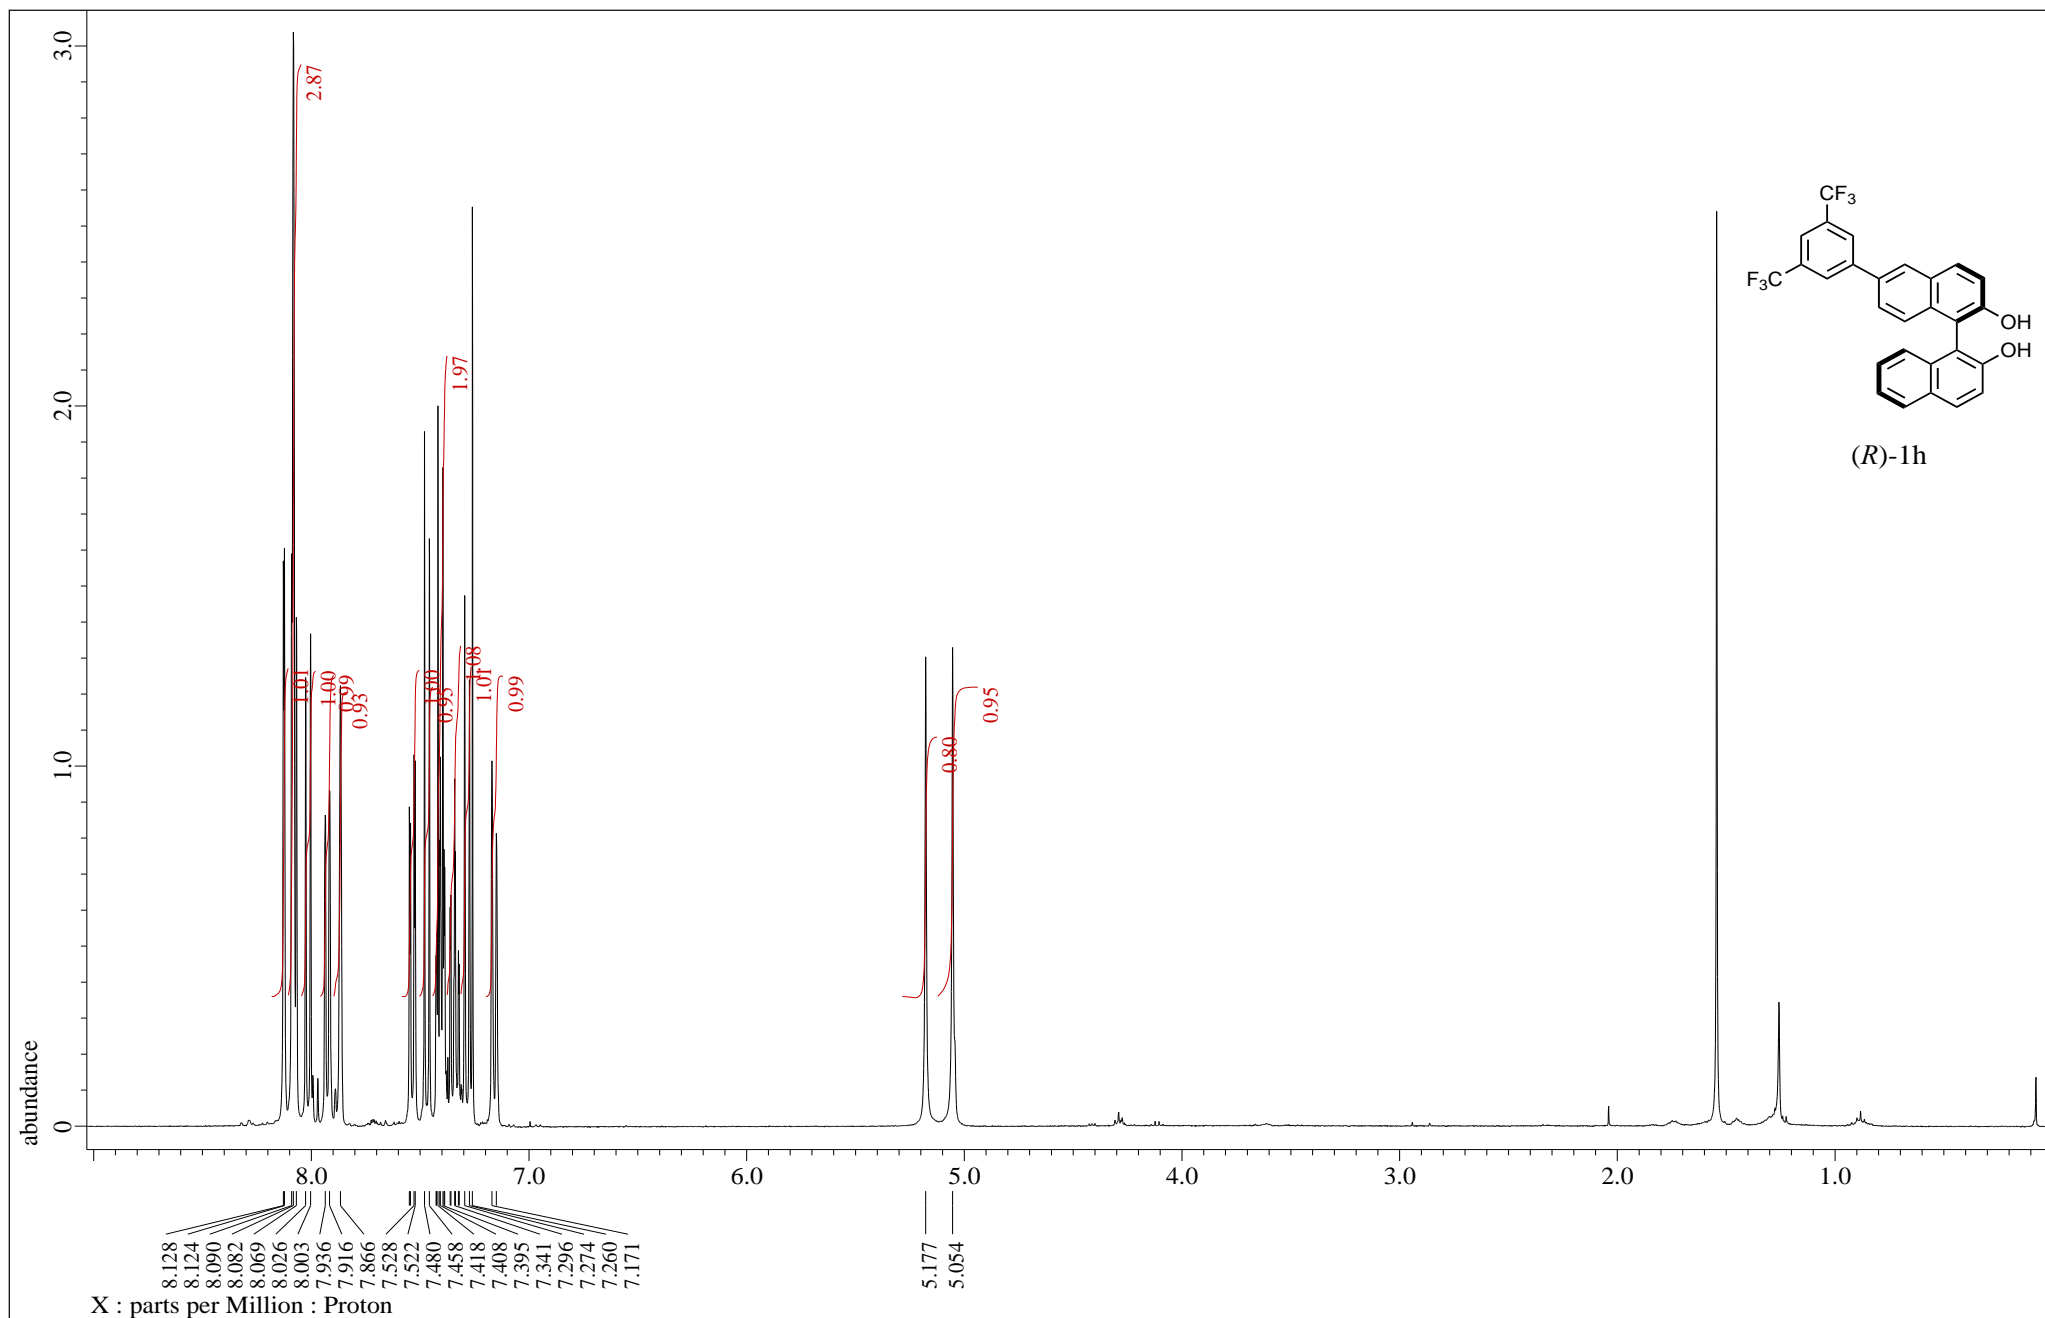

$^1\text{H}$  NMR spectrum (400 MHz,  $\text{CDCl}_3$ ) of (R)-1h

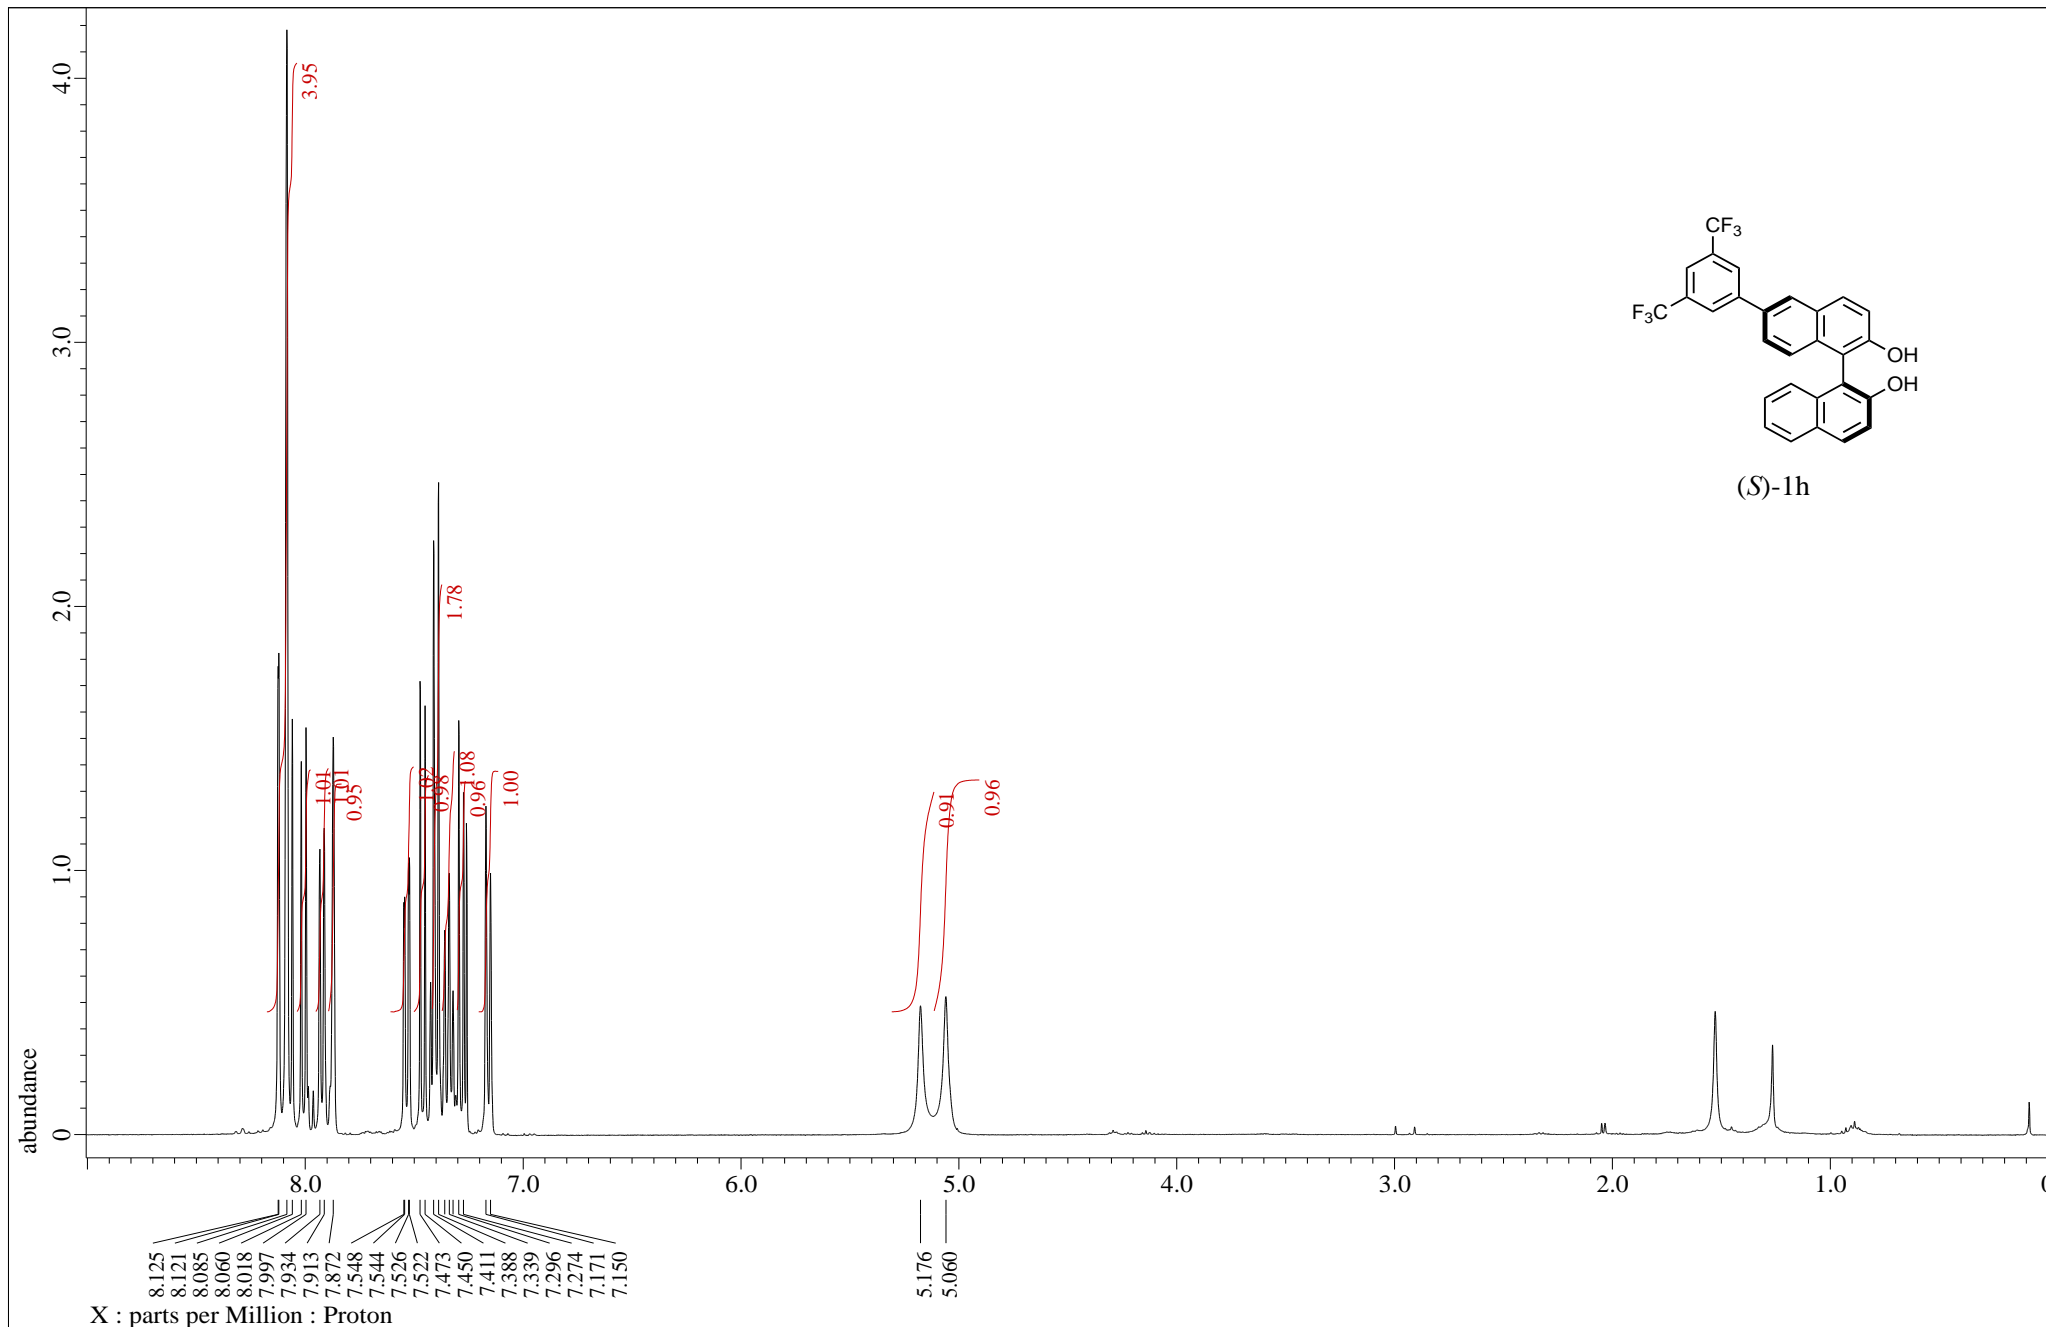

<sup>1</sup>H NMR spectrum (400 MHz, CDCl<sub>3</sub>) of (S)-1

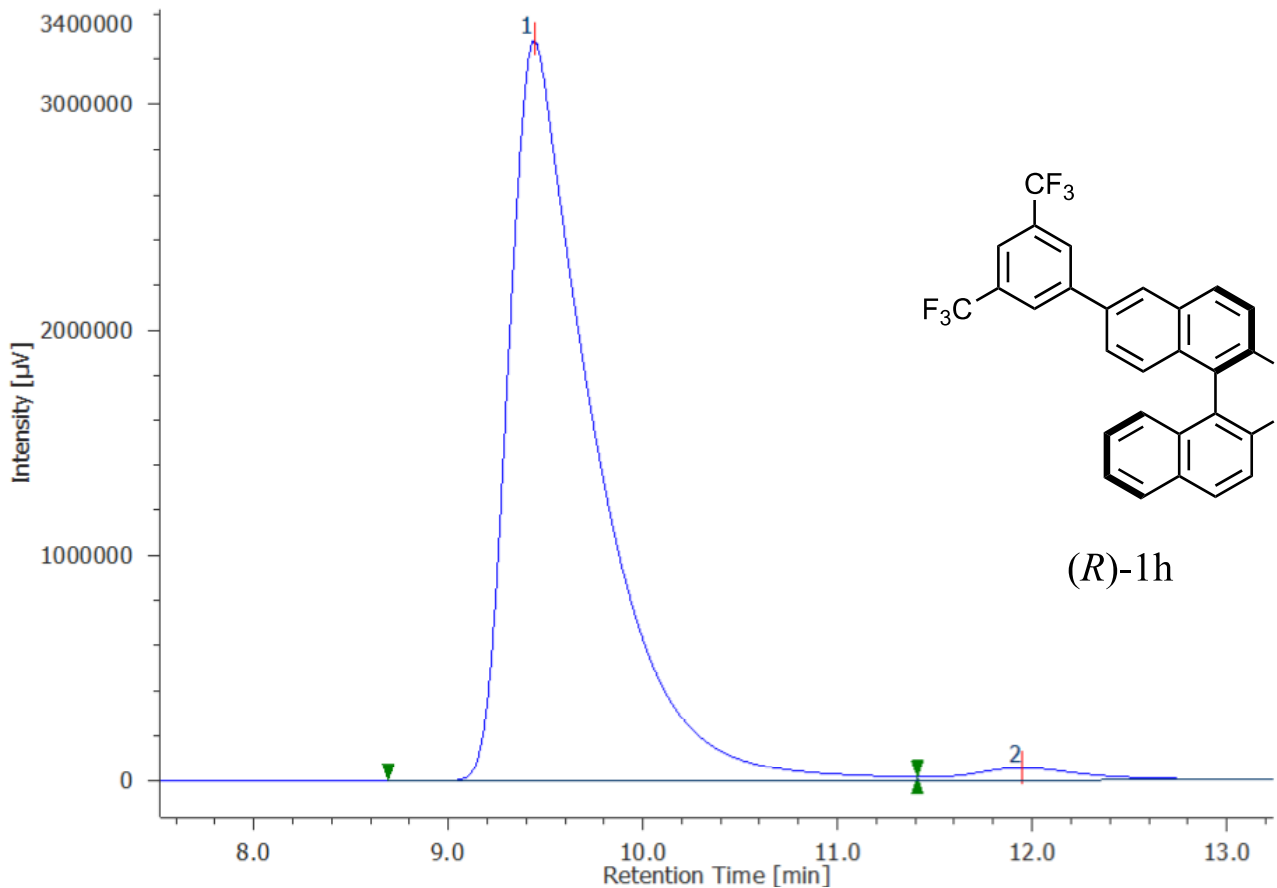

| # | ピーク名    | CH | tR [min] | 面積 [μV·sec] | 高さ [μV] | 面積%    | 高さ%    | 定量値 | NTP  | 分離度   | シンメトリー係数 | 警告 |
|---|---------|----|----------|-------------|---------|--------|--------|-----|------|-------|----------|----|
| 1 | Unknown | 9  | 9.443    | 100343899   | 3284082 | 97.730 | 98.338 | N/A | 2578 | 2.894 | 2.121    |    |
| 2 | Unknown | 9  | 11.950   | 2331205     | 55487   | 2.270  | 1.662  | N/A | 2317 | N/A   | N/A      |    |

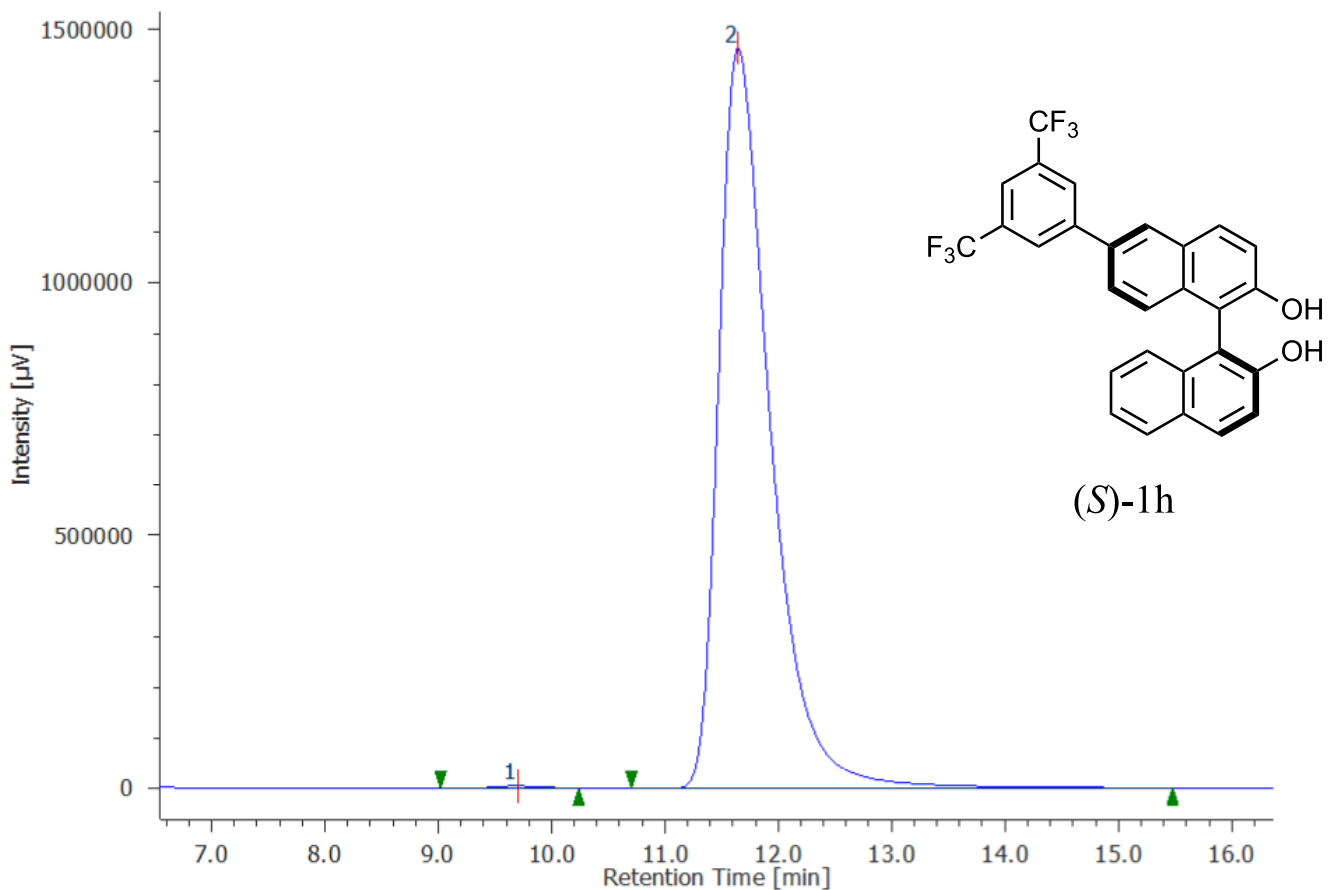

| # | ピーク名    | CH | tR [min] | 面積 [μV·sec] | 高さ [μV] | 面積%    | 高さ%    | 定量値 | NTP  | 分離度   | シンメトリー係数 | 警告 |
|---|---------|----|----------|-------------|---------|--------|--------|-----|------|-------|----------|----|
| 1 | Unknown | 10 | 9.700    | 126056      | 4489    | 0.271  | 0.306  | N/A | 2501 | 2.491 | 1.133    |    |
| 2 | Unknown | 10 | 11.647   | 46324946    | 1462624 | 99.729 | 99.694 | N/A | 3467 | N/A   | 1.589    |    |



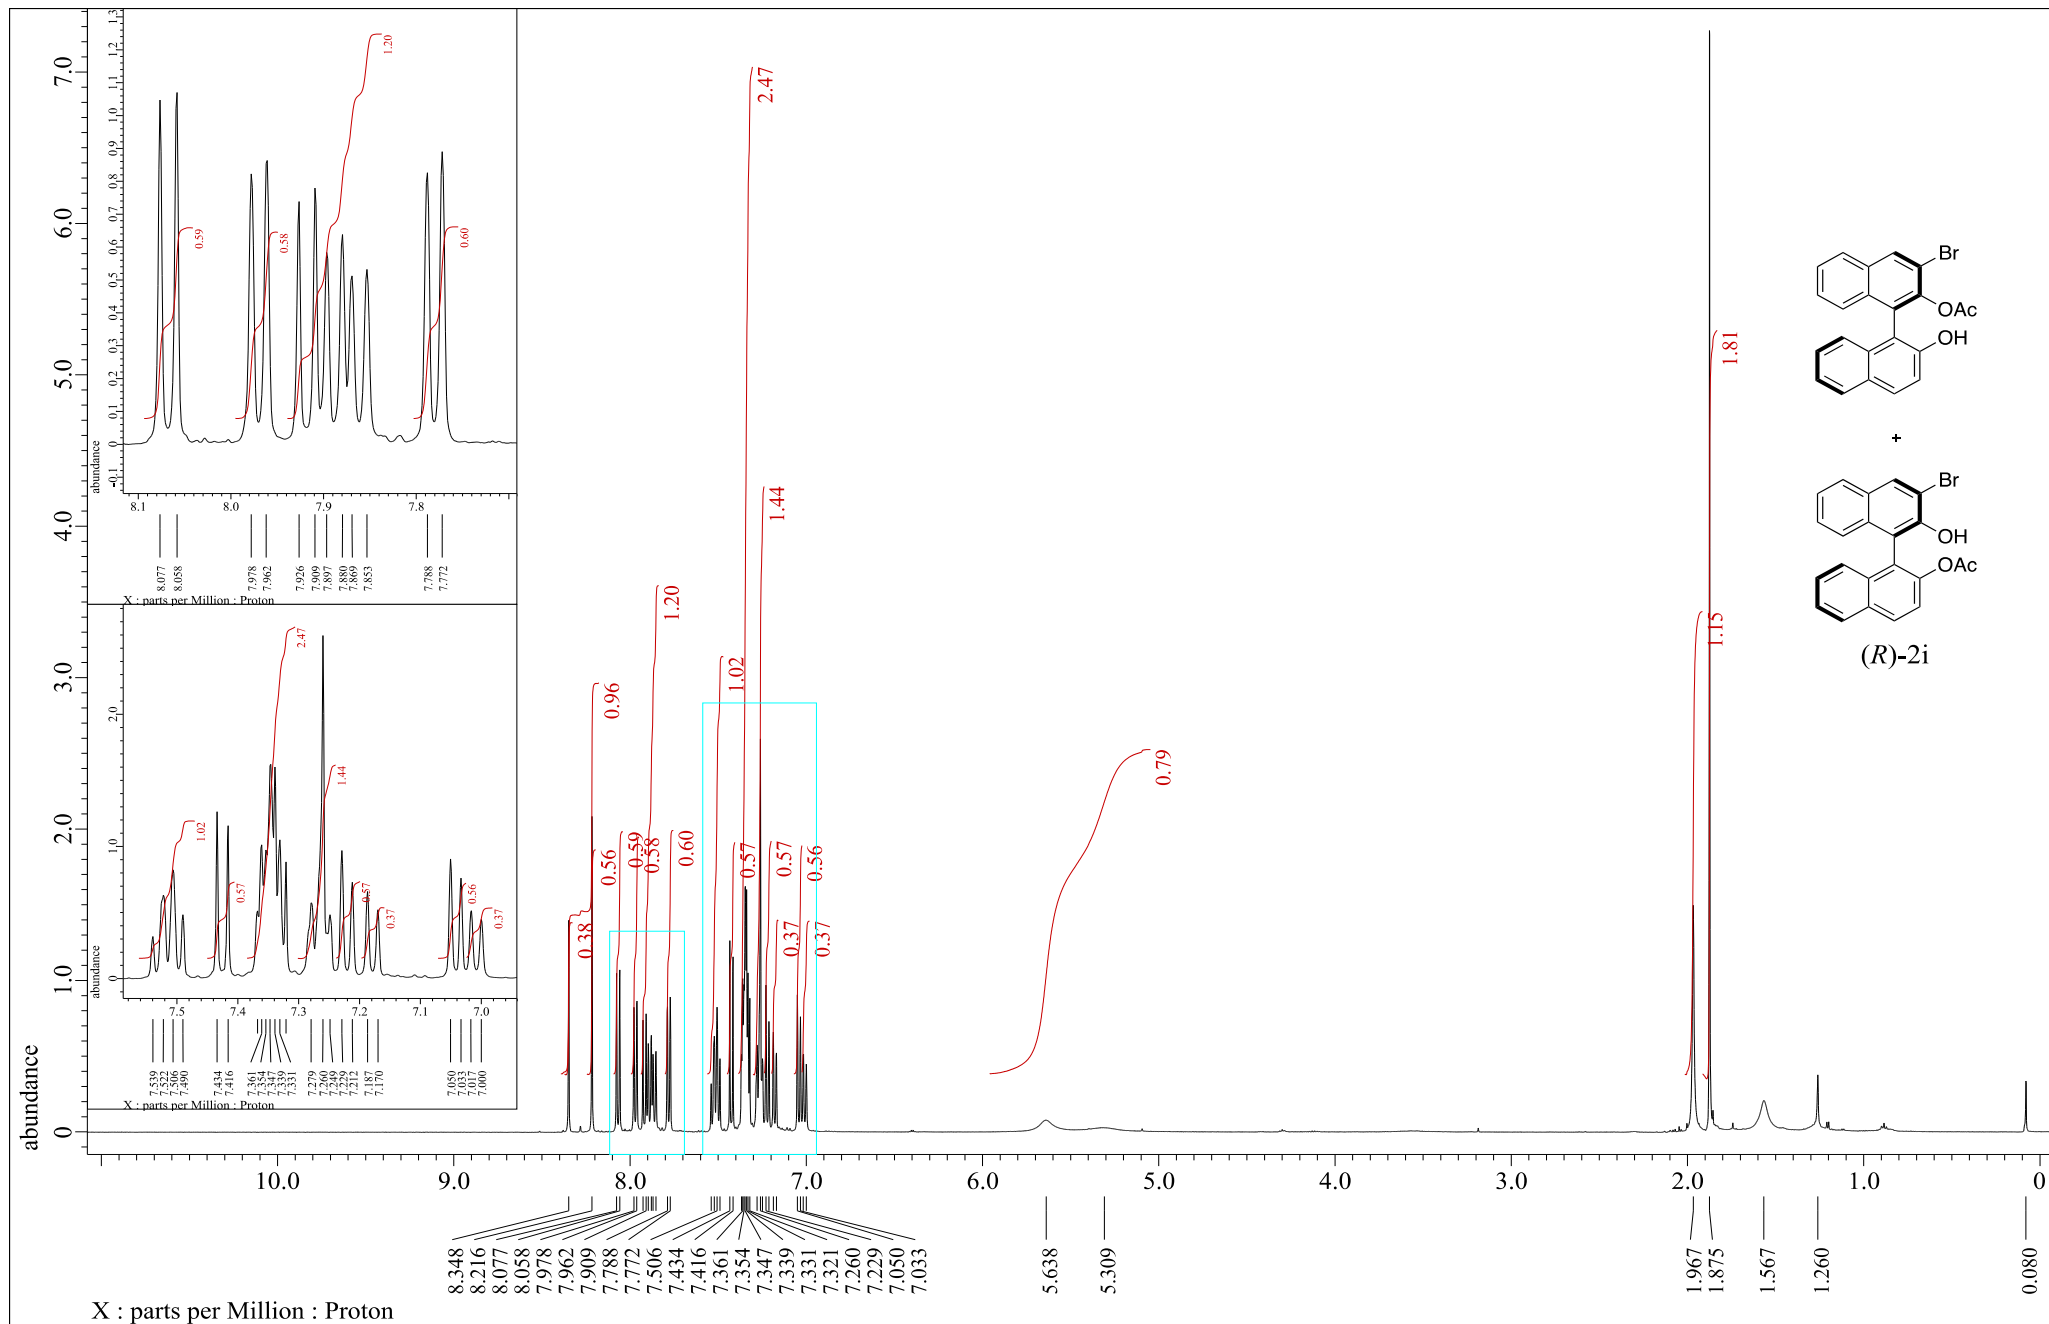

<sup>1</sup>H NMR spectrum (500 MHz, CDCl<sub>3</sub>) of *(R)*-2i

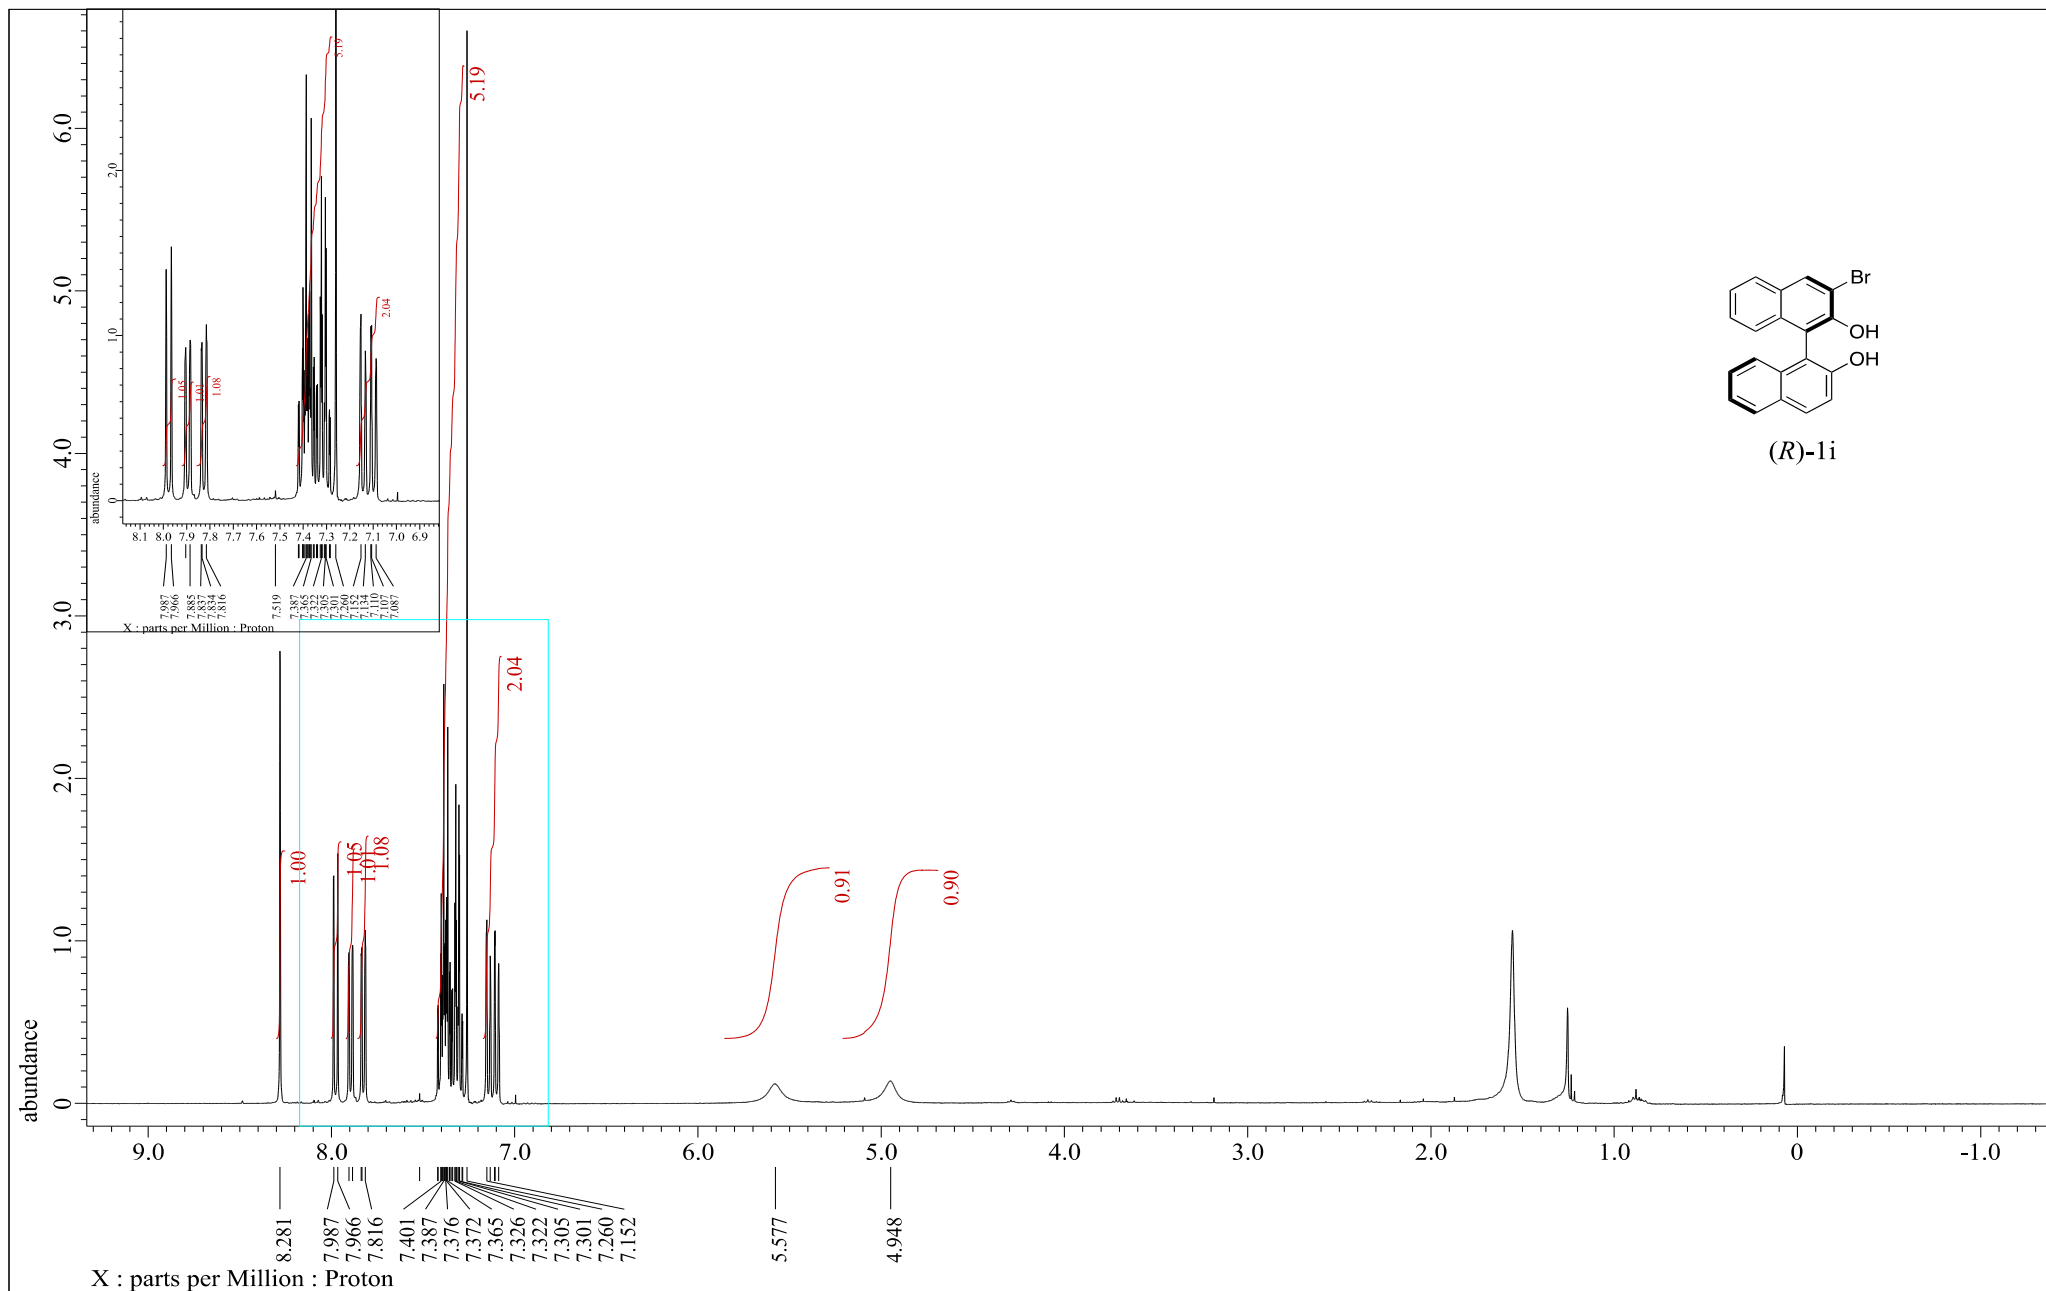

<sup>1</sup>H NMR spectrum (400 MHz, CDCl<sub>3</sub>) of *(R)*-1i

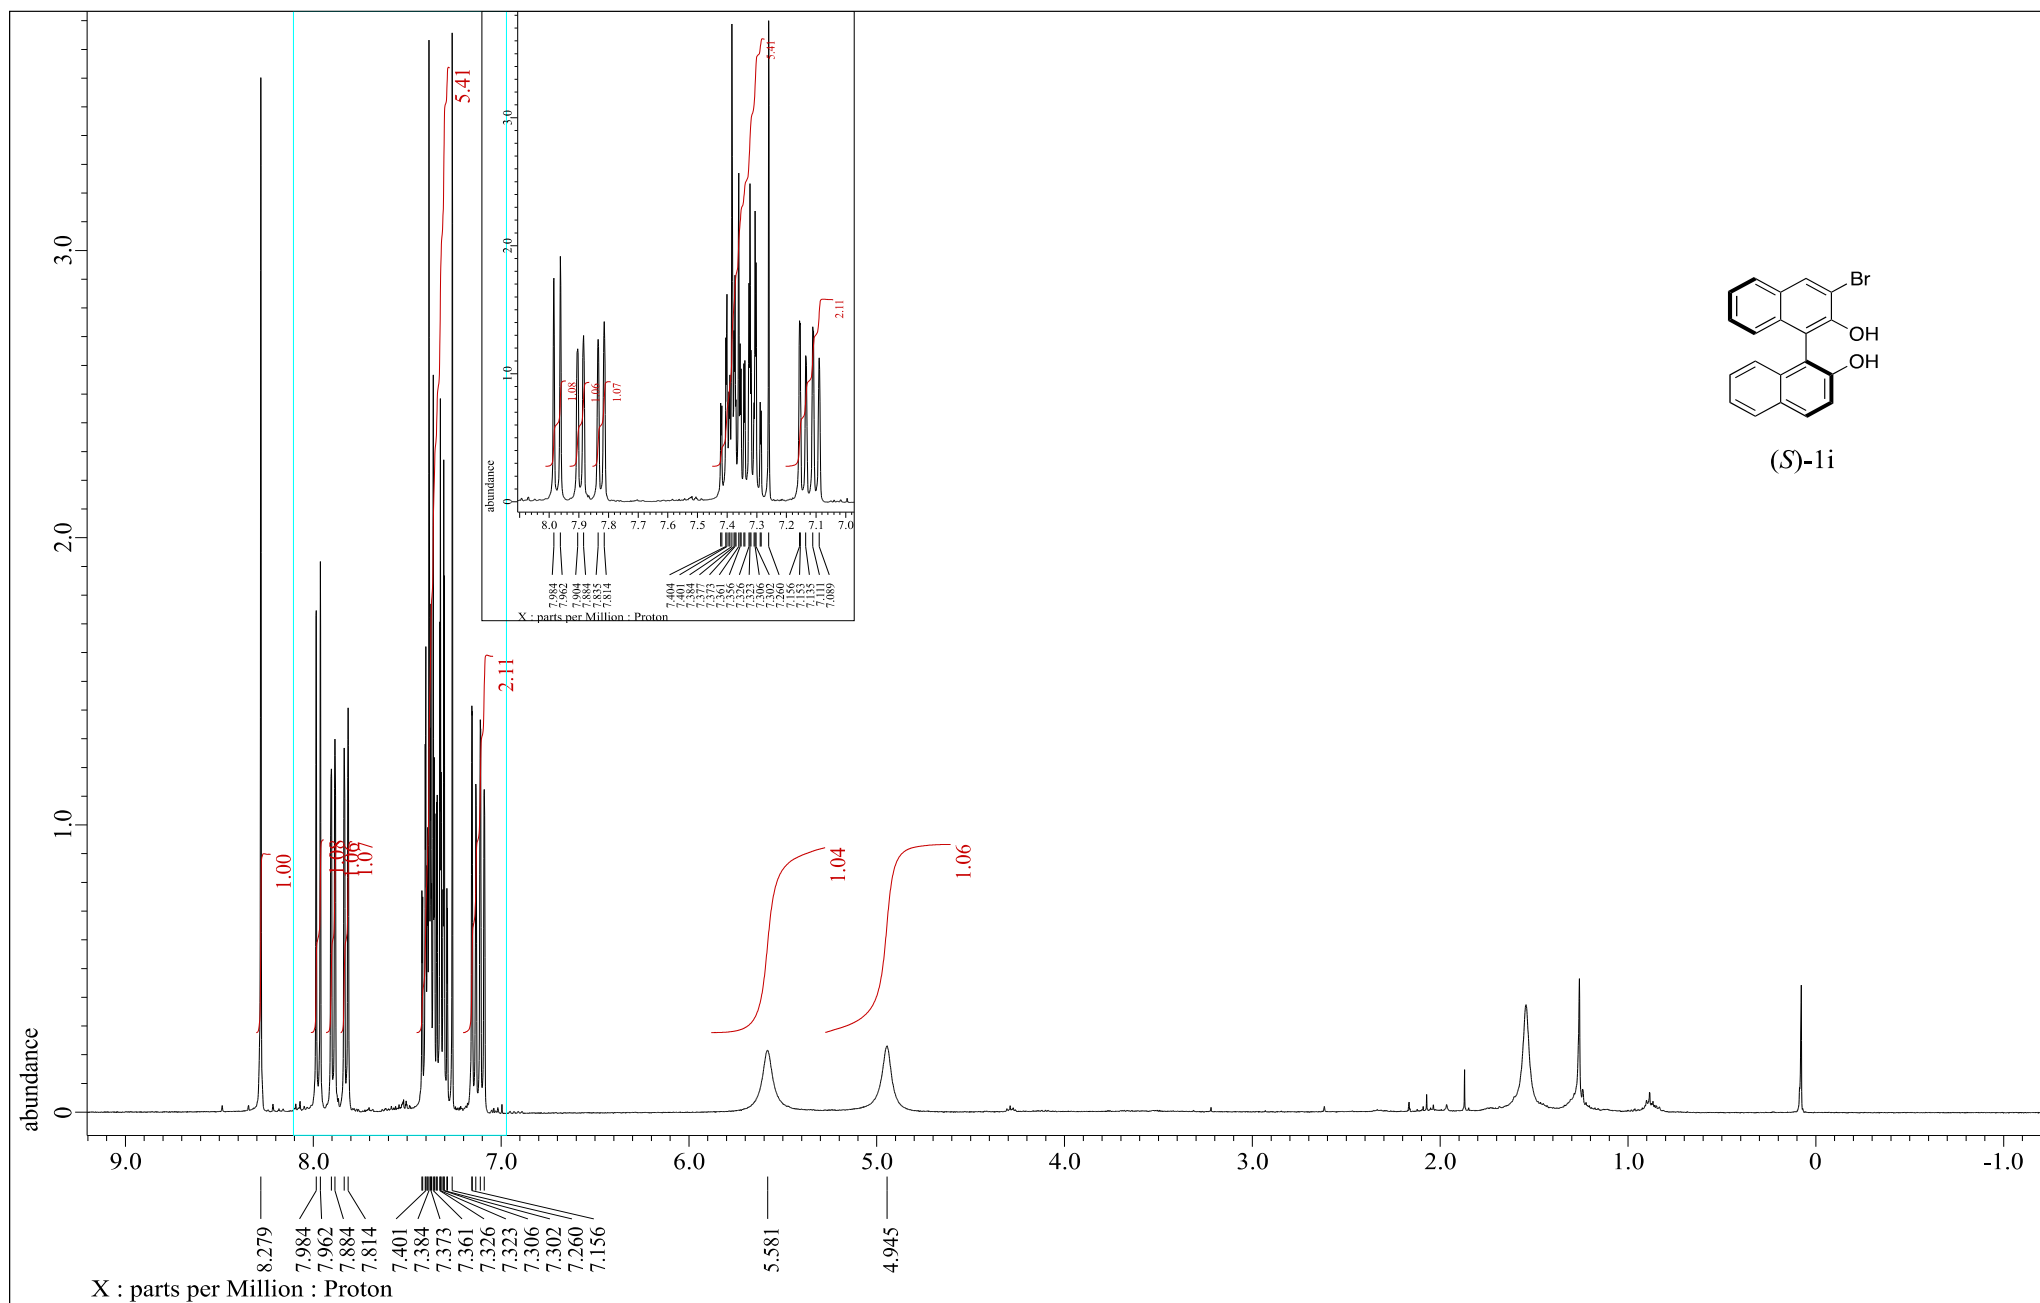

<sup>1</sup>H NMR spectrum (400 MHz, CDCl<sub>3</sub>) of (S)-1i

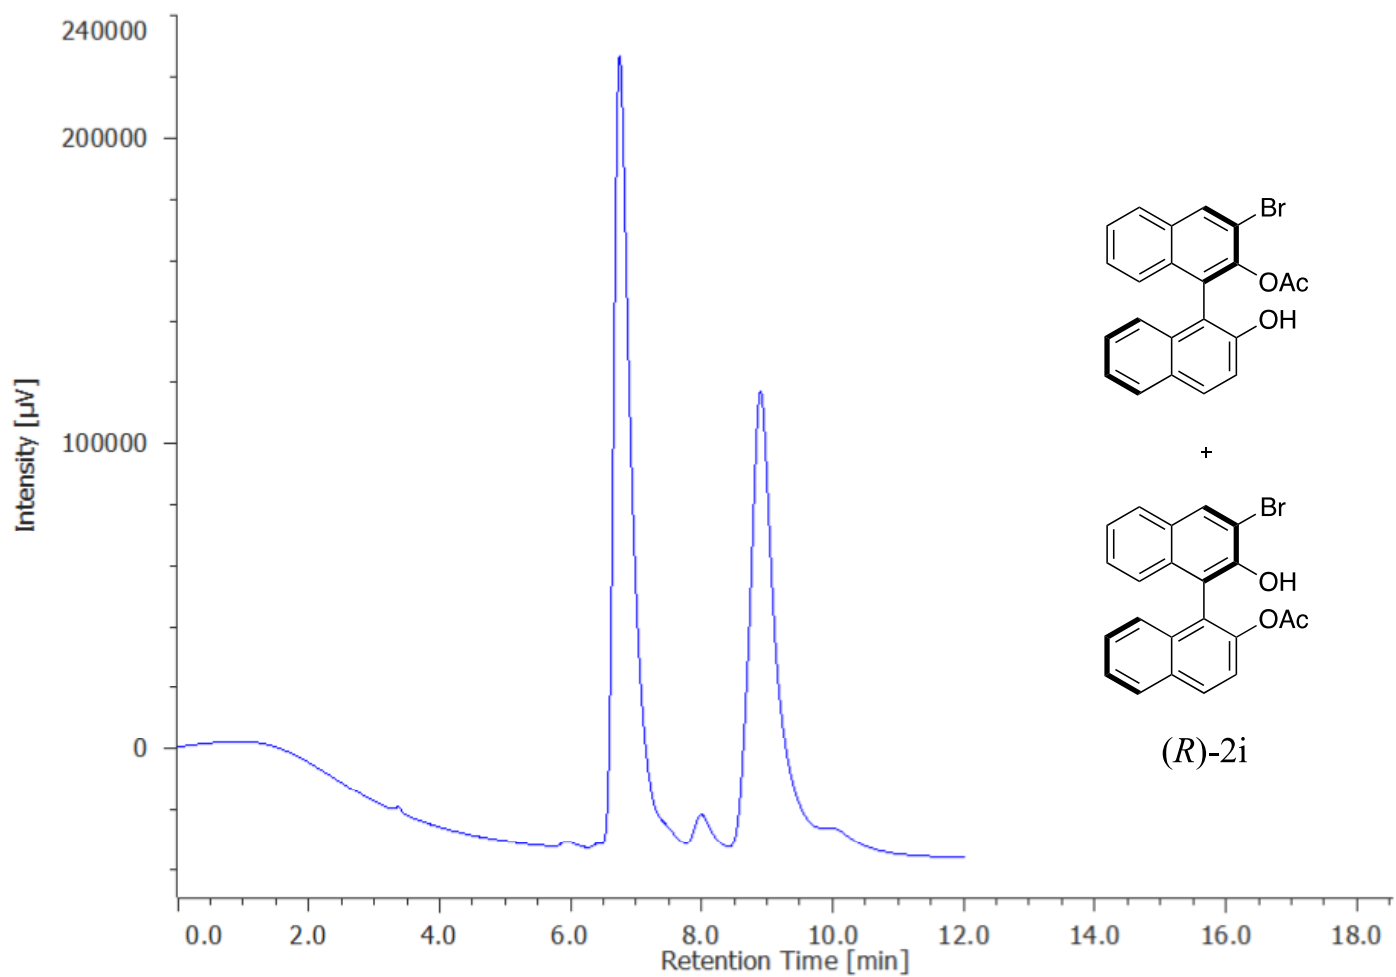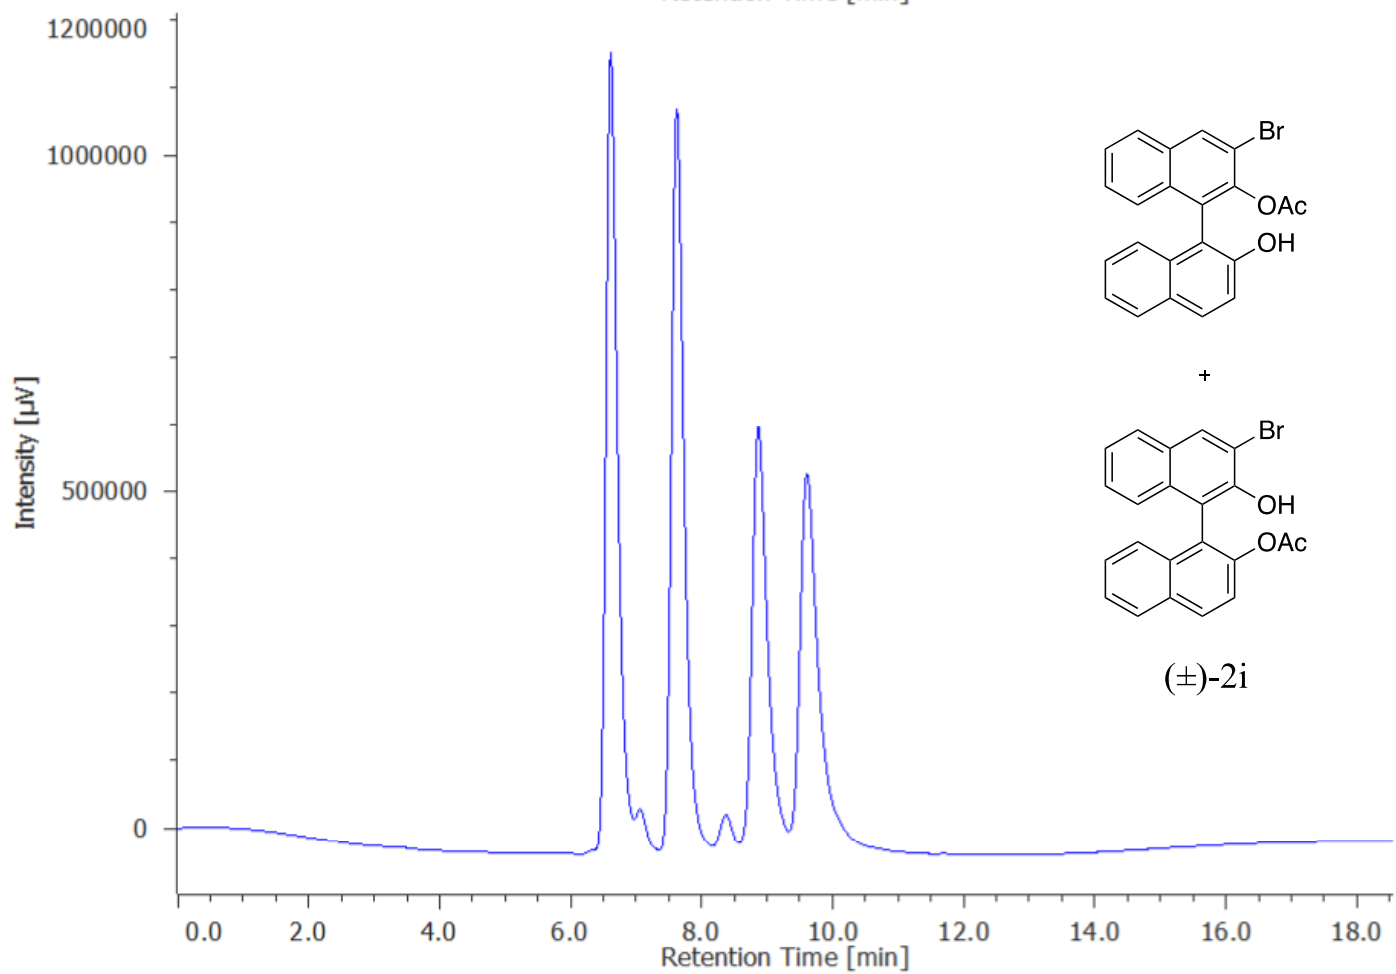

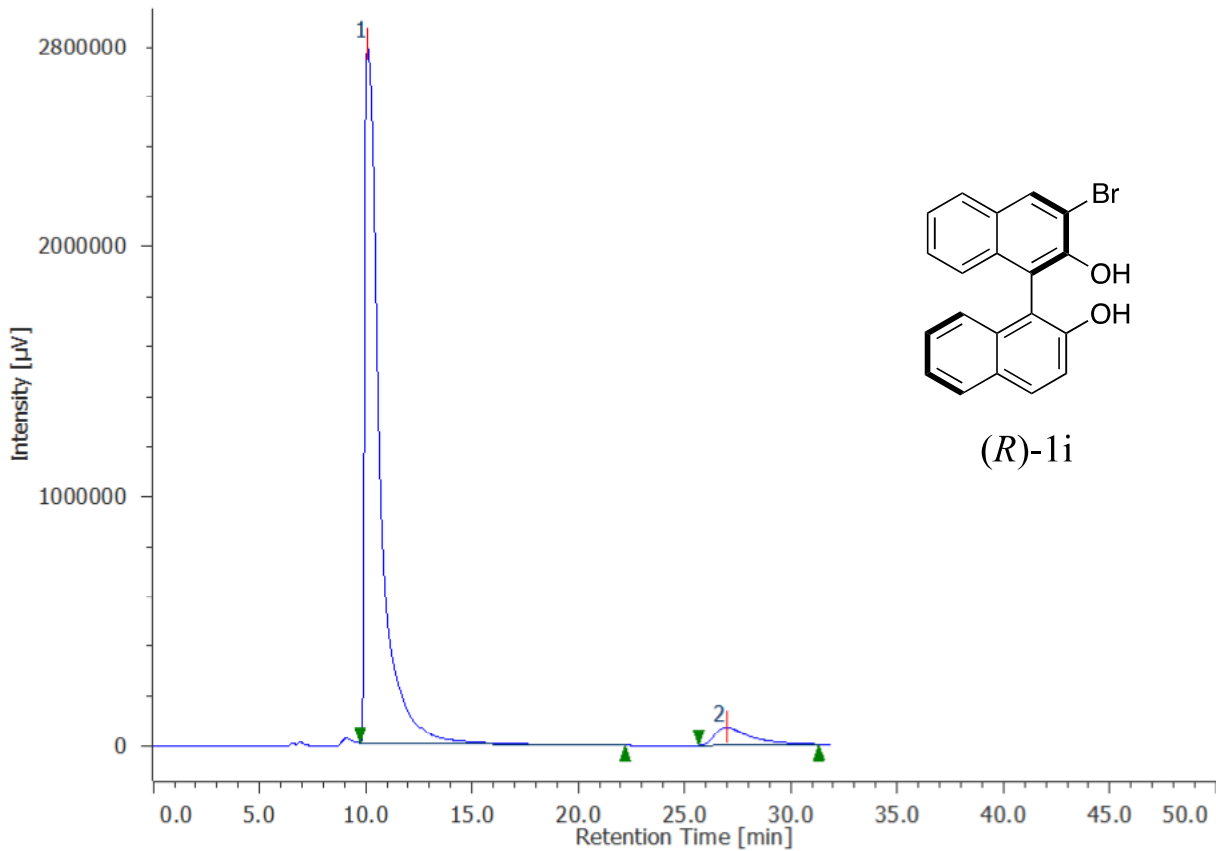

| # | ピーク名    | CH | tR [min] | 面積 [ $\mu\text{V}\cdot\text{sec}$ ] | 高さ [ $\mu\text{V}$ ] | 面積%    | 高さ%    | 定量値 | NTP  | 分離度   | シメトリー係数 | 警告 |
|---|---------|----|----------|-------------------------------------|----------------------|--------|--------|-----|------|-------|---------|----|
| 1 | Unknown | 6  | 10.087   | 121213244                           | 2991984              | 95.605 | 98.280 | N/A | 2146 | 9.502 | 3.979   |    |
| 2 | Unknown | 6  | 26.980   | 5571902                             | 52363                | 4.395  | 1.720  | N/A | 1605 | N/A   | 1.870   |    |

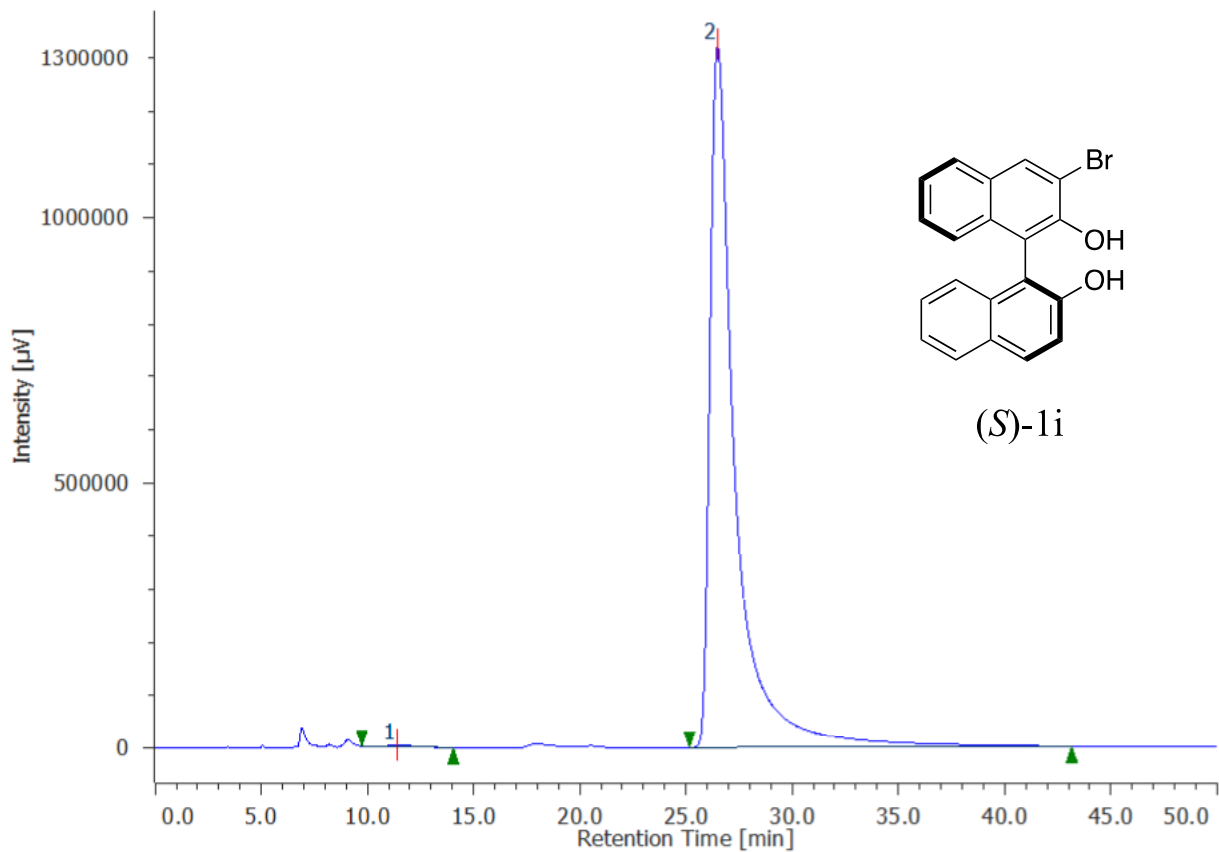

| # | ピーク名    | CH | tR [min] | 面積 [ $\mu\text{V}\cdot\text{sec}$ ] | 高さ [ $\mu\text{V}$ ] | 面積%    | 高さ%    | 定量値 | NTP  | 分離度   | シメトリー係数 | 警告 |
|---|---------|----|----------|-------------------------------------|----------------------|--------|--------|-----|------|-------|---------|----|
| 1 | Unknown | 9  | 11.373   | 235037                              | 2783                 | 0.213  | 0.210  | N/A | 415  | 7.566 | 1.221   |    |
| 2 | Unknown | 9  | 26.487   | 109925291                           | 1322223              | 99.787 | 99.790 | N/A | 3576 | N/A   | 2.508   |    |

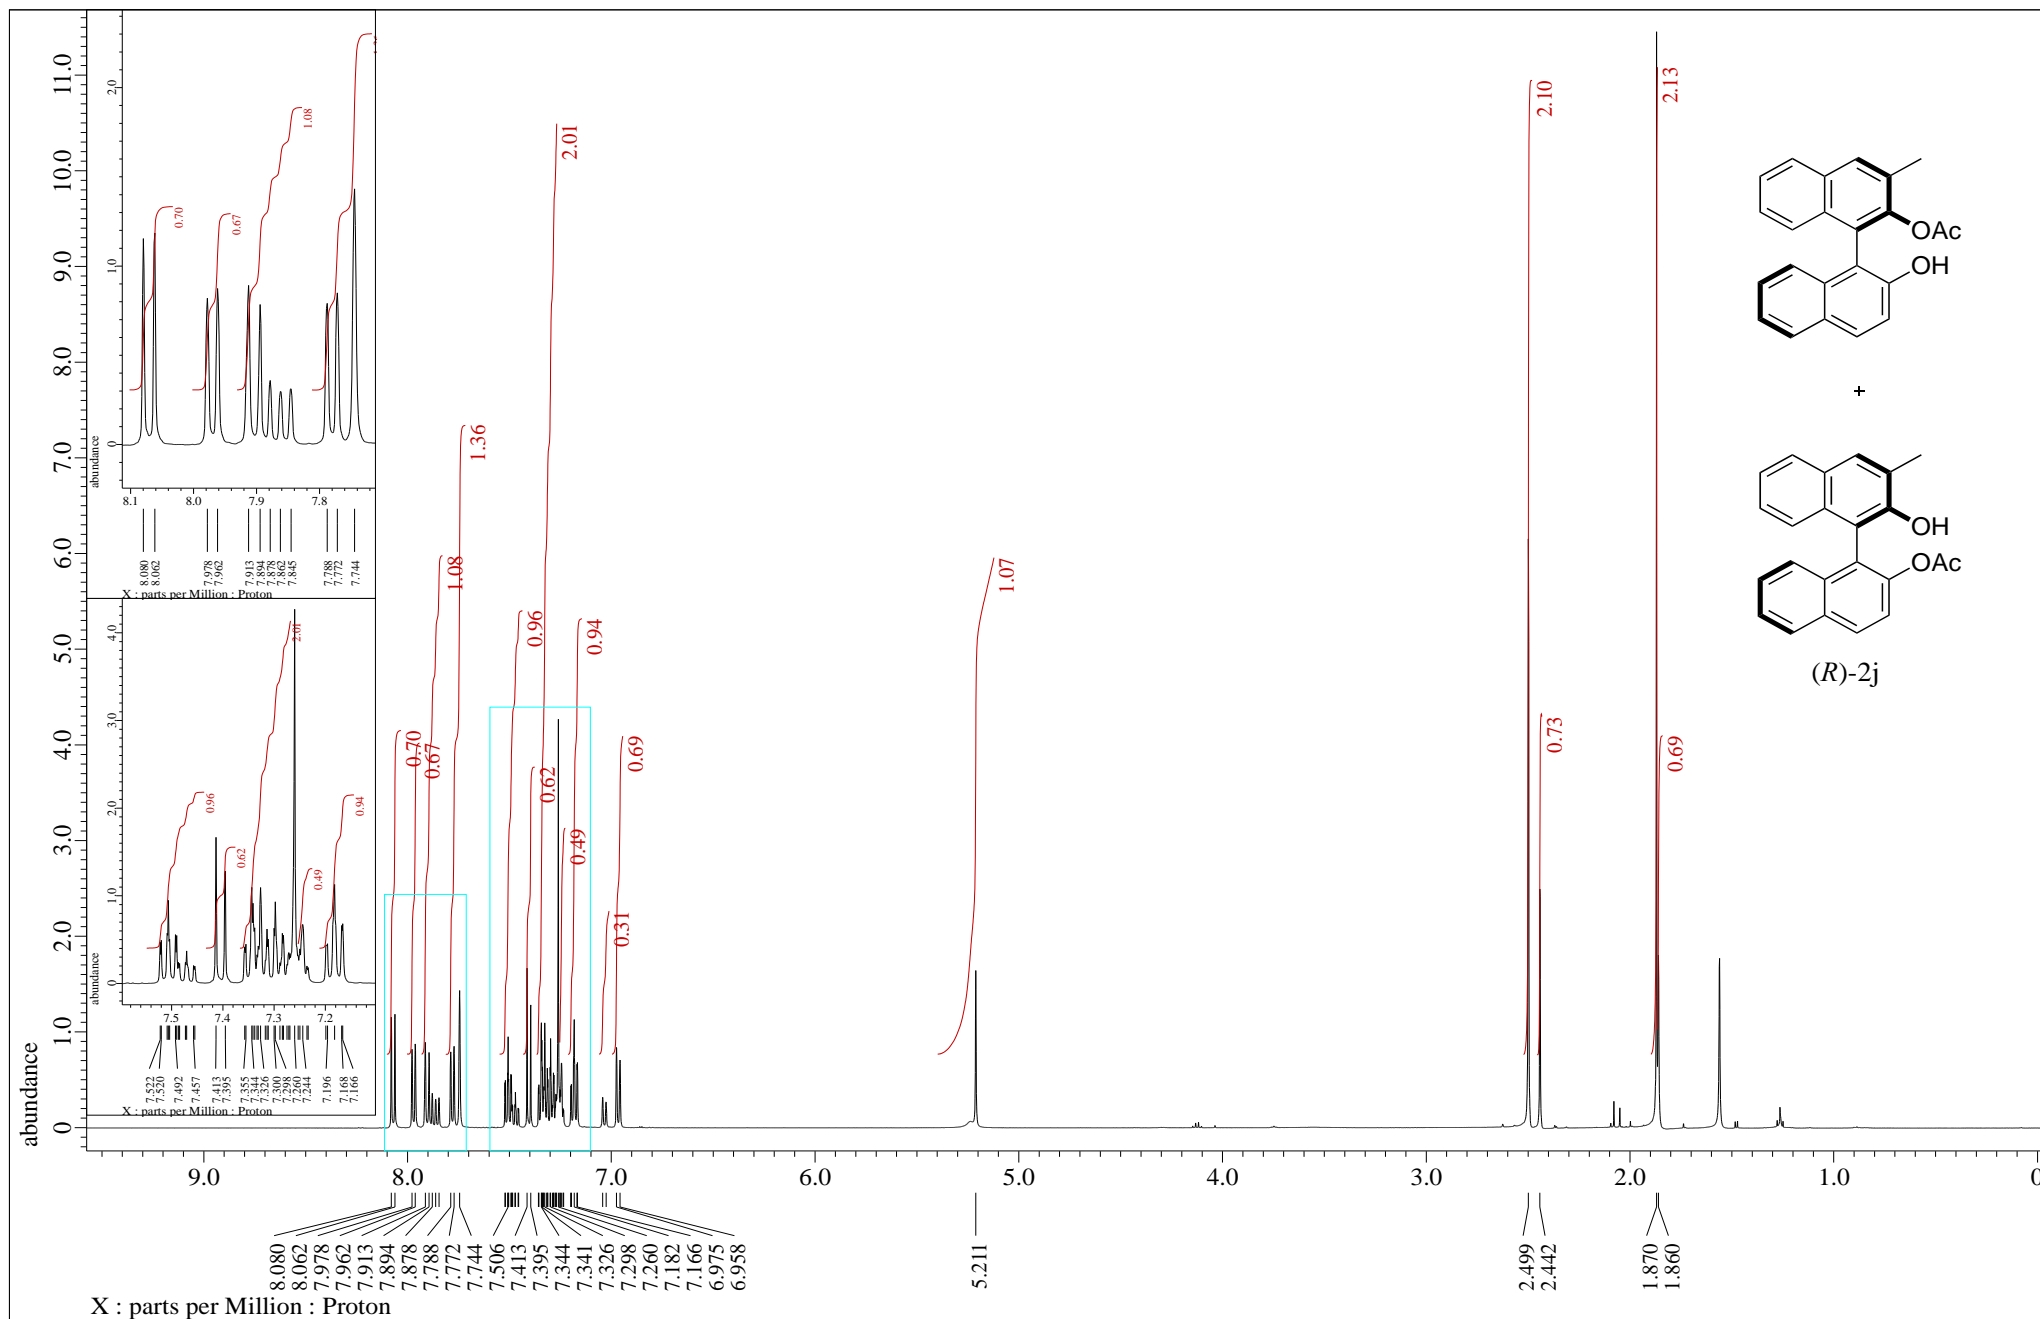

<sup>1</sup>H NMR spectrum (500 MHz, CDCl<sub>3</sub>) of (R)-2j

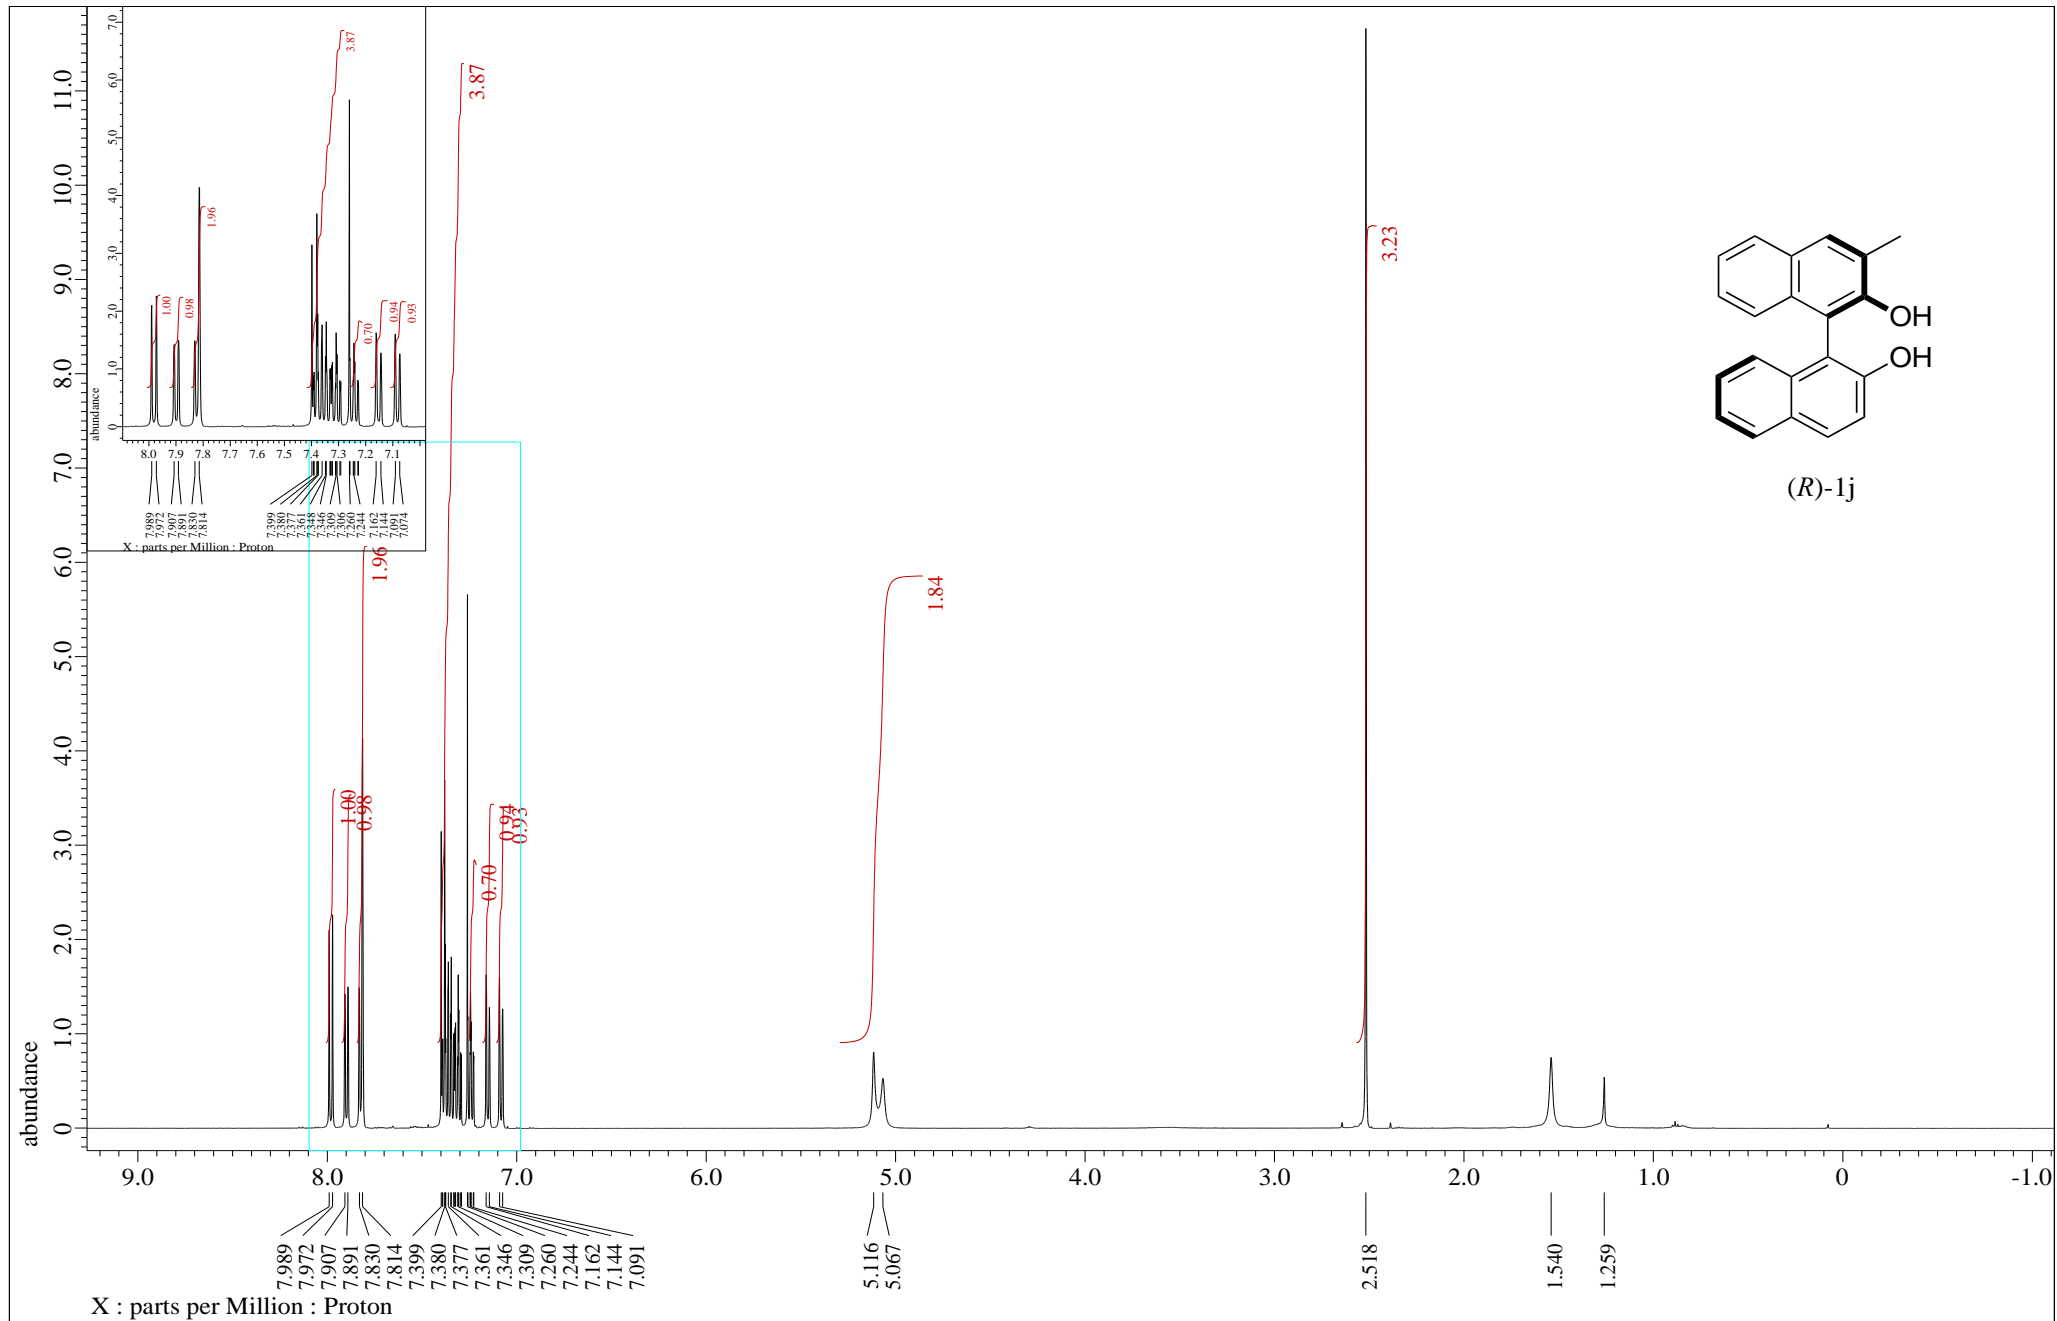

<sup>1</sup>H NMR spectrum (500 MHz, CDCl<sub>3</sub>) of (R)-1j

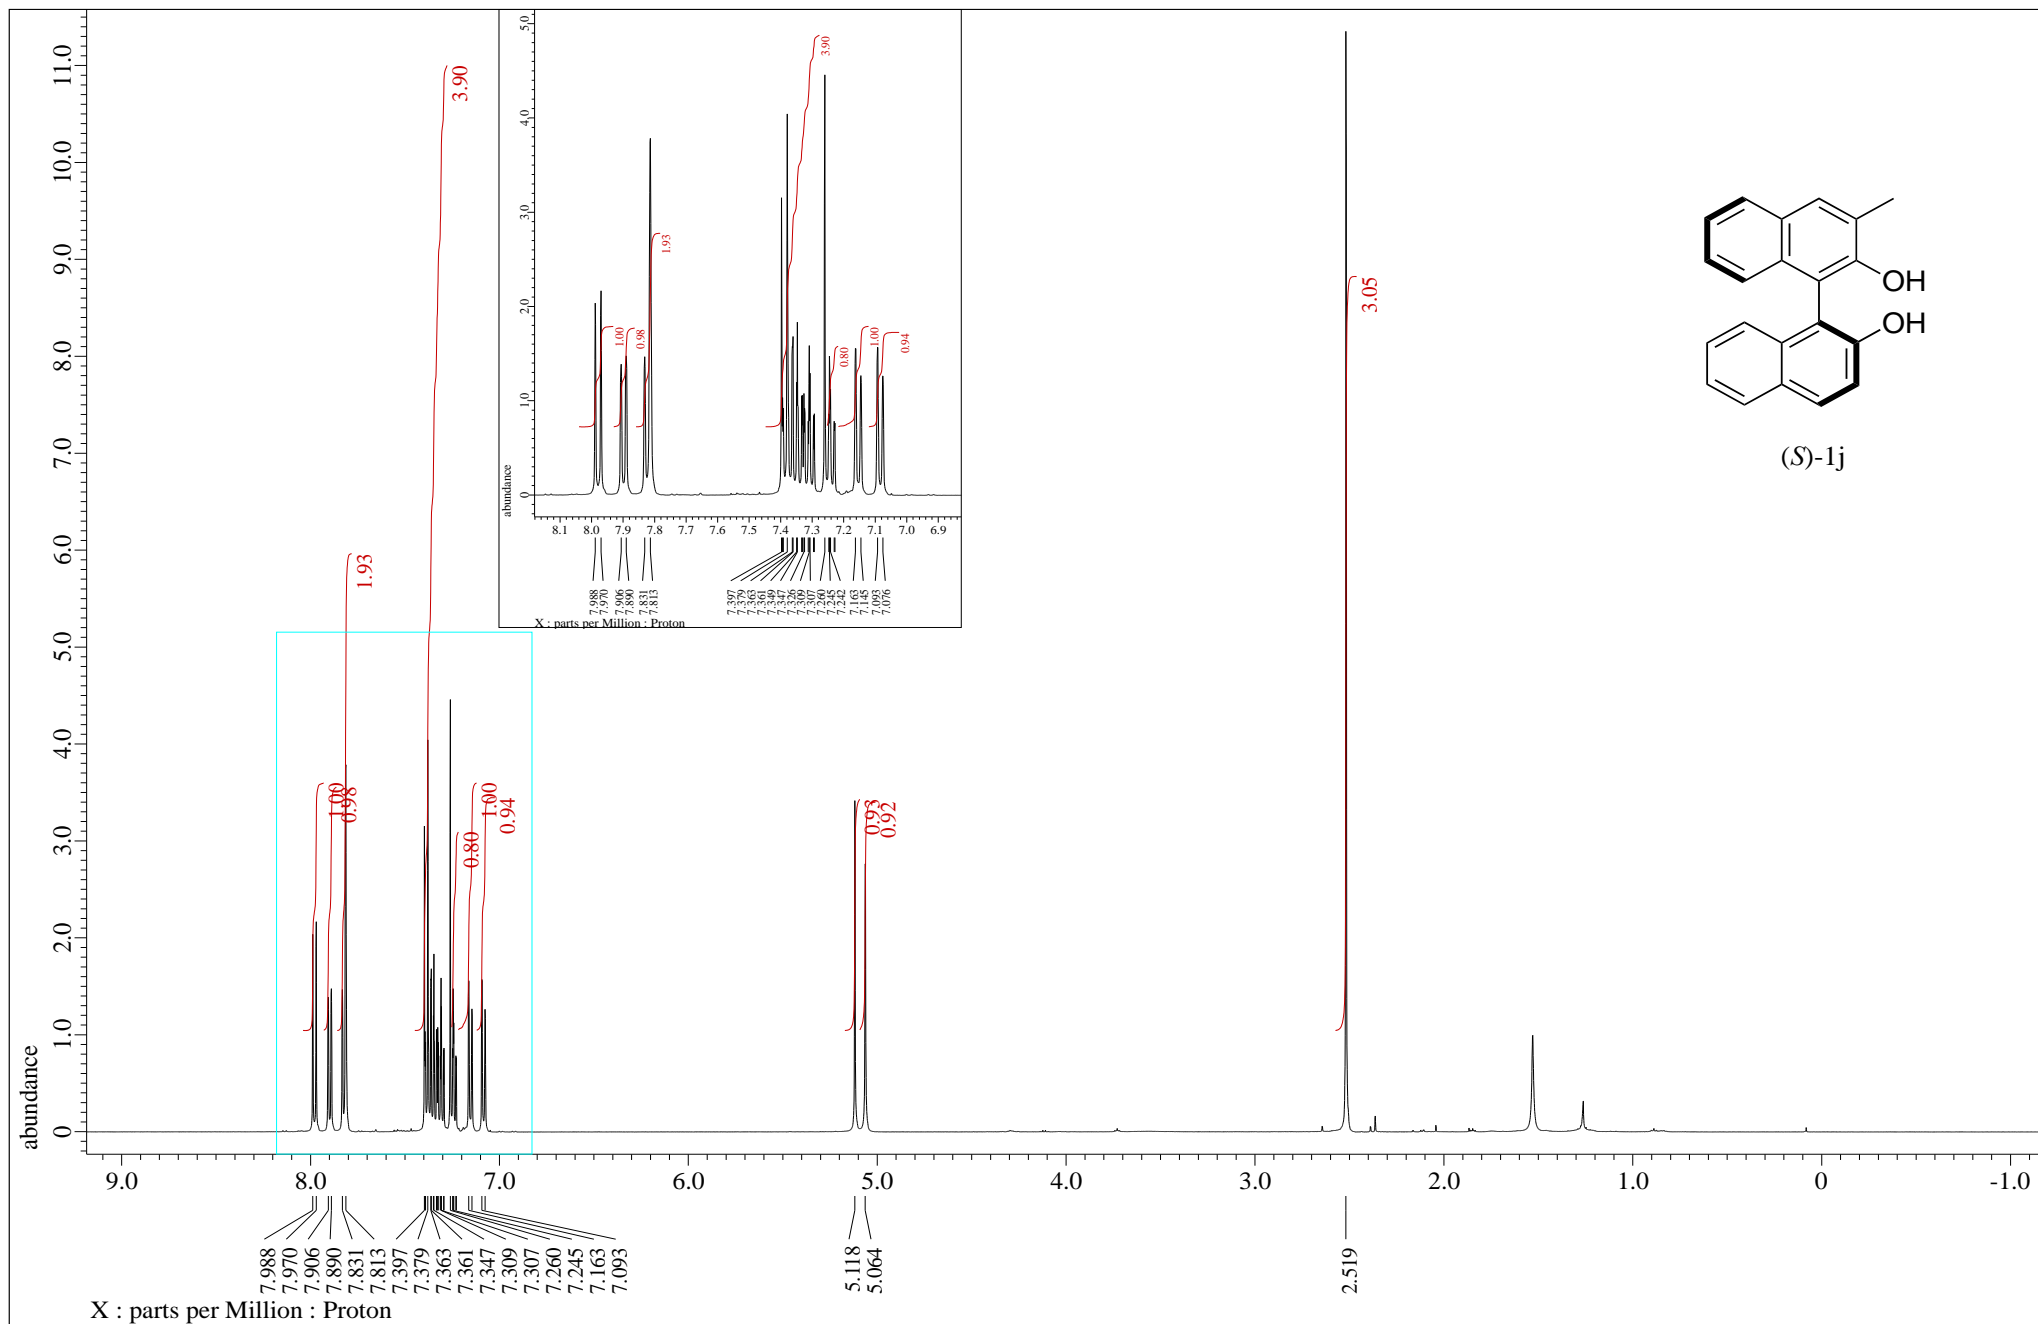

<sup>1</sup>H NMR spectrum (500 MHz, CDCl<sub>3</sub>) of (S)-1j



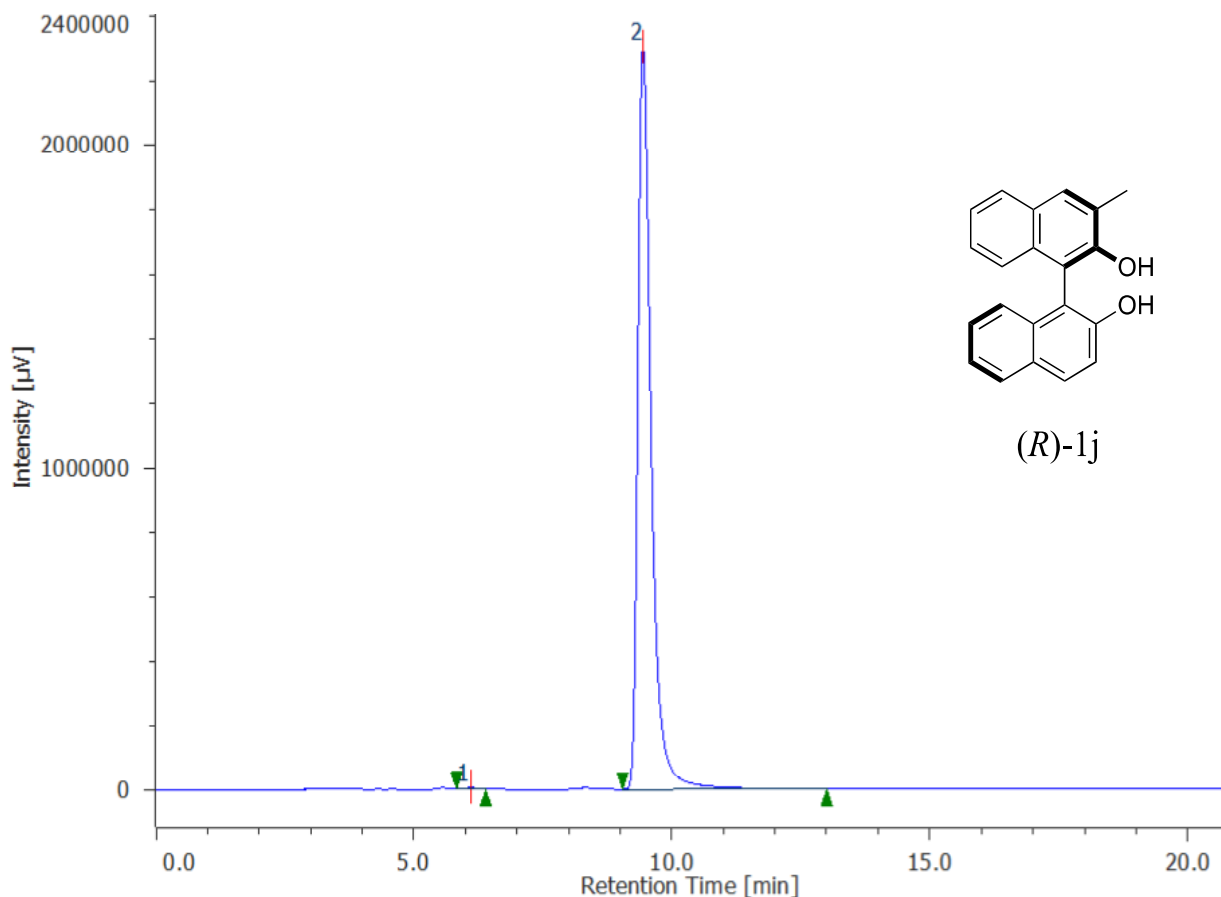

| # | ピーク名    | CH | tR [min] | 面積 [ $\mu\text{V}\cdot\text{sec}$ ] | 高さ [ $\mu\text{V}$ ] | 面積%    | 高さ%    | 定量値 | NTP  | 分離度   | シンメトリー係数 | 警告 |
|---|---------|----|----------|-------------------------------------|----------------------|--------|--------|-----|------|-------|----------|----|
| 1 | Unknown | 9  | 5.957    | 12489285                            | 997407               | 95.780 | 96.955 | N/A | 6626 | 9.067 | 1.754    |    |
| 2 | Unknown | 9  | 9.297    | 550302                              | 31322                | 4.220  | 3.045  | N/A | 6952 | N/A   | 1.514    |    |

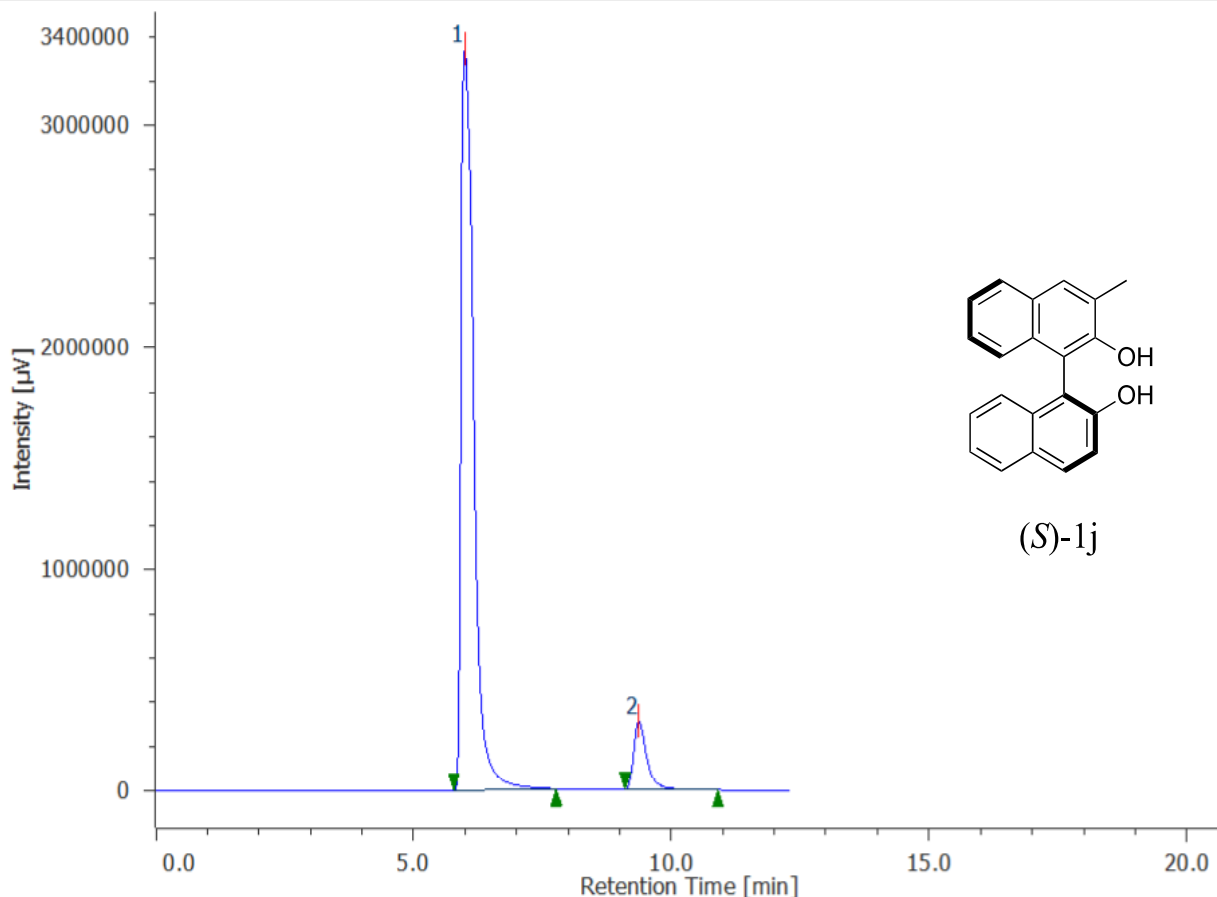

| # | ピーク名    | CH | tR [min] | 面積 [ $\mu\text{V}\cdot\text{sec}$ ] | 高さ [ $\mu\text{V}$ ] | 面積%    | 高さ%    | 定量値 | NTP  | 分離度   | シンメトリー係数 | 警告 |
|---|---------|----|----------|-------------------------------------|----------------------|--------|--------|-----|------|-------|----------|----|
| 1 | Unknown | 9  | 6.093    | 94943                               | 7427                 | 0.203  | 0.316  | N/A | 5401 | 8.181 | 1.490    |    |
| 2 | Unknown | 9  | 9.437    | 46635200                            | 2345576              | 99.797 | 99.684 | N/A | 5985 | N/A   | 1.652    |    |

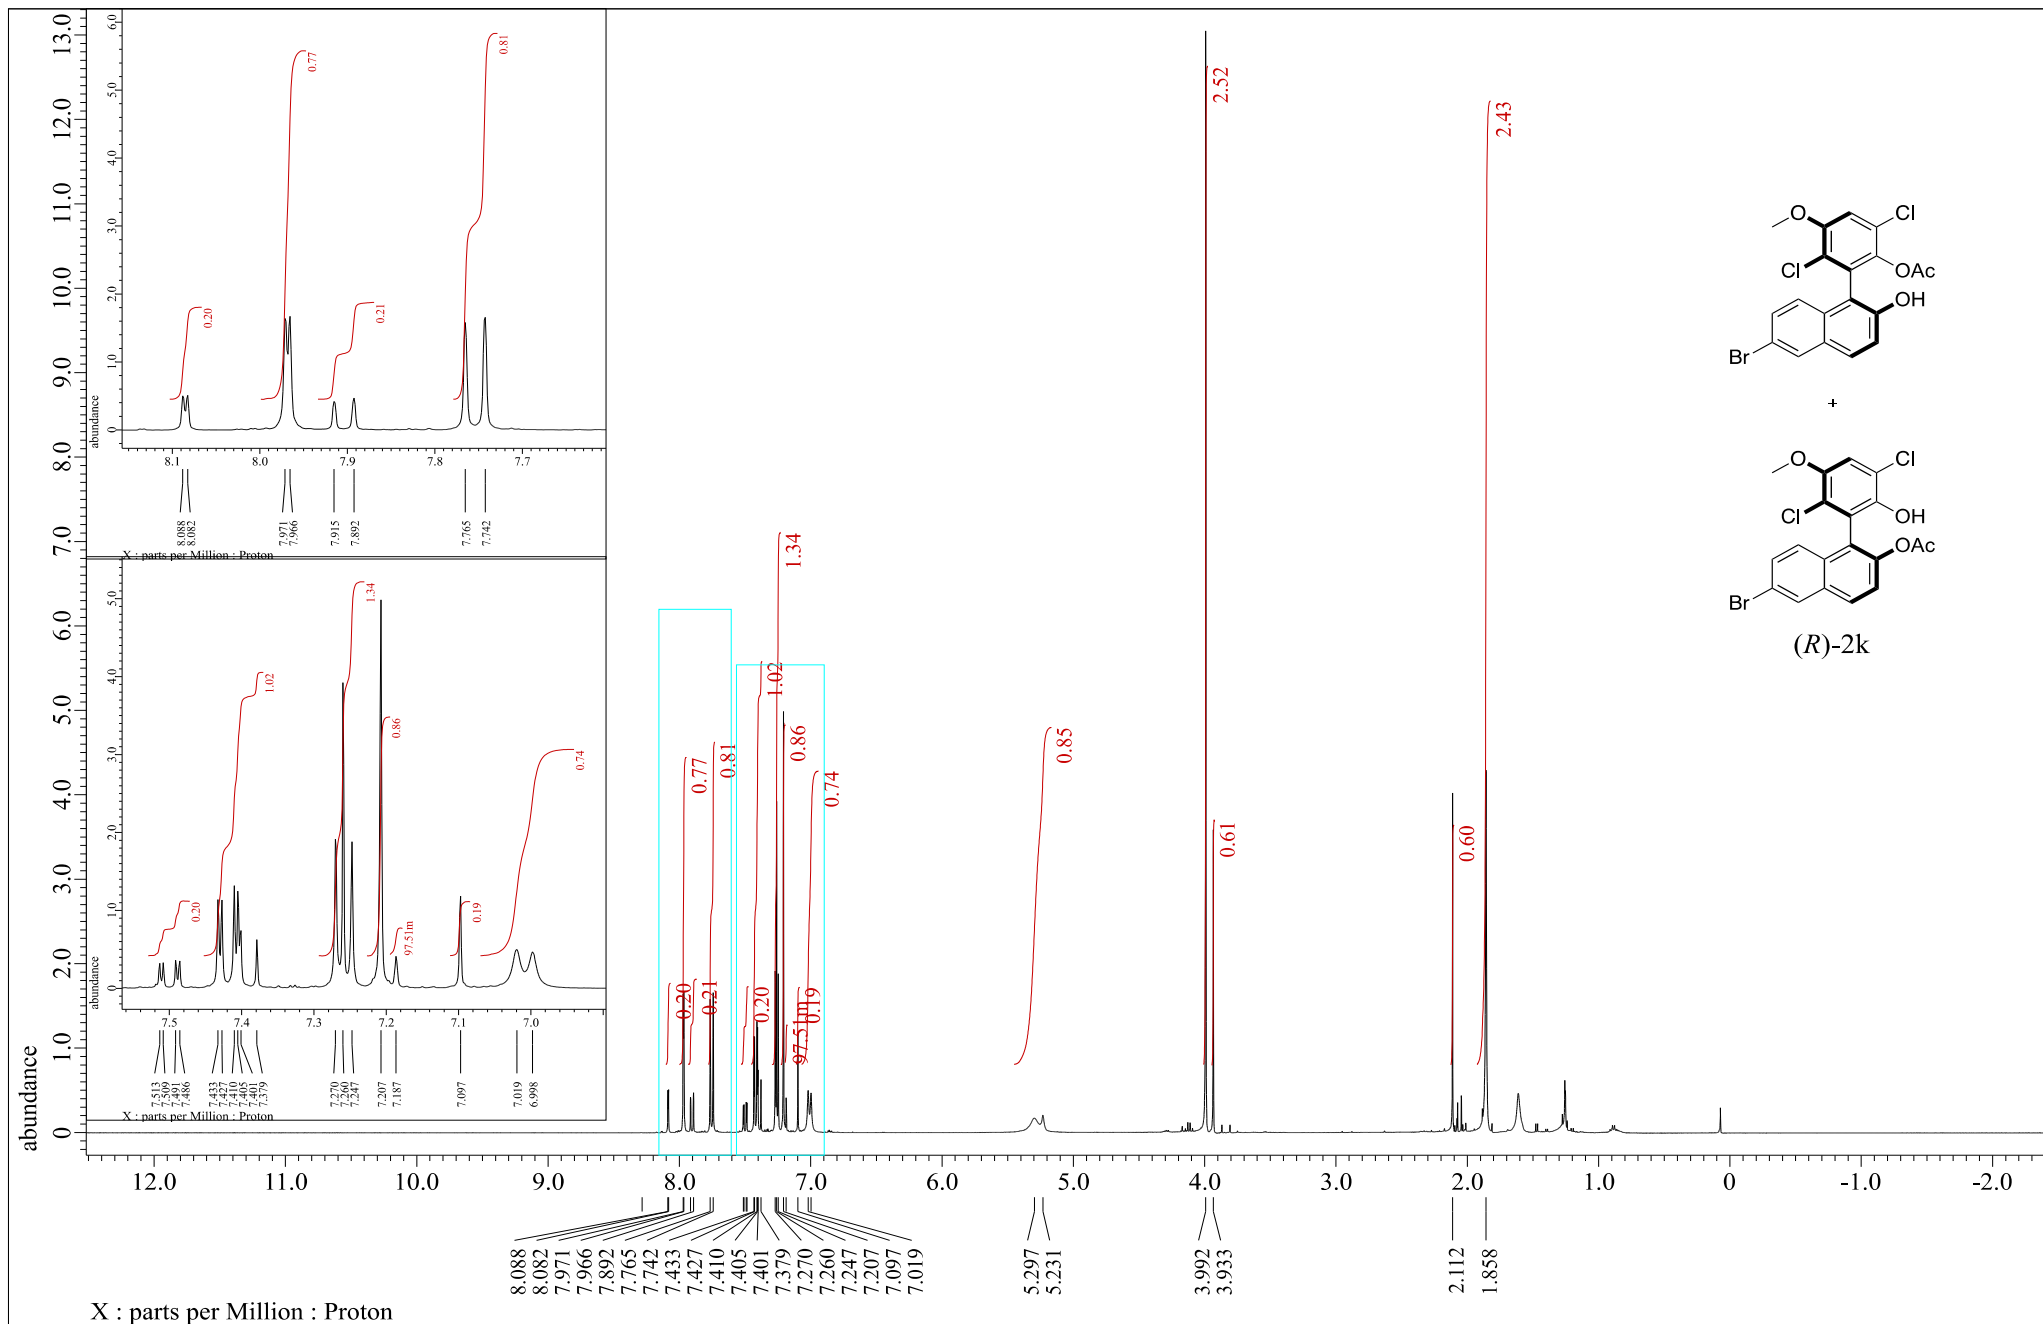

<sup>1</sup>H NMR spectrum (500 MHz, CDCl<sub>3</sub>) of (R)-1k

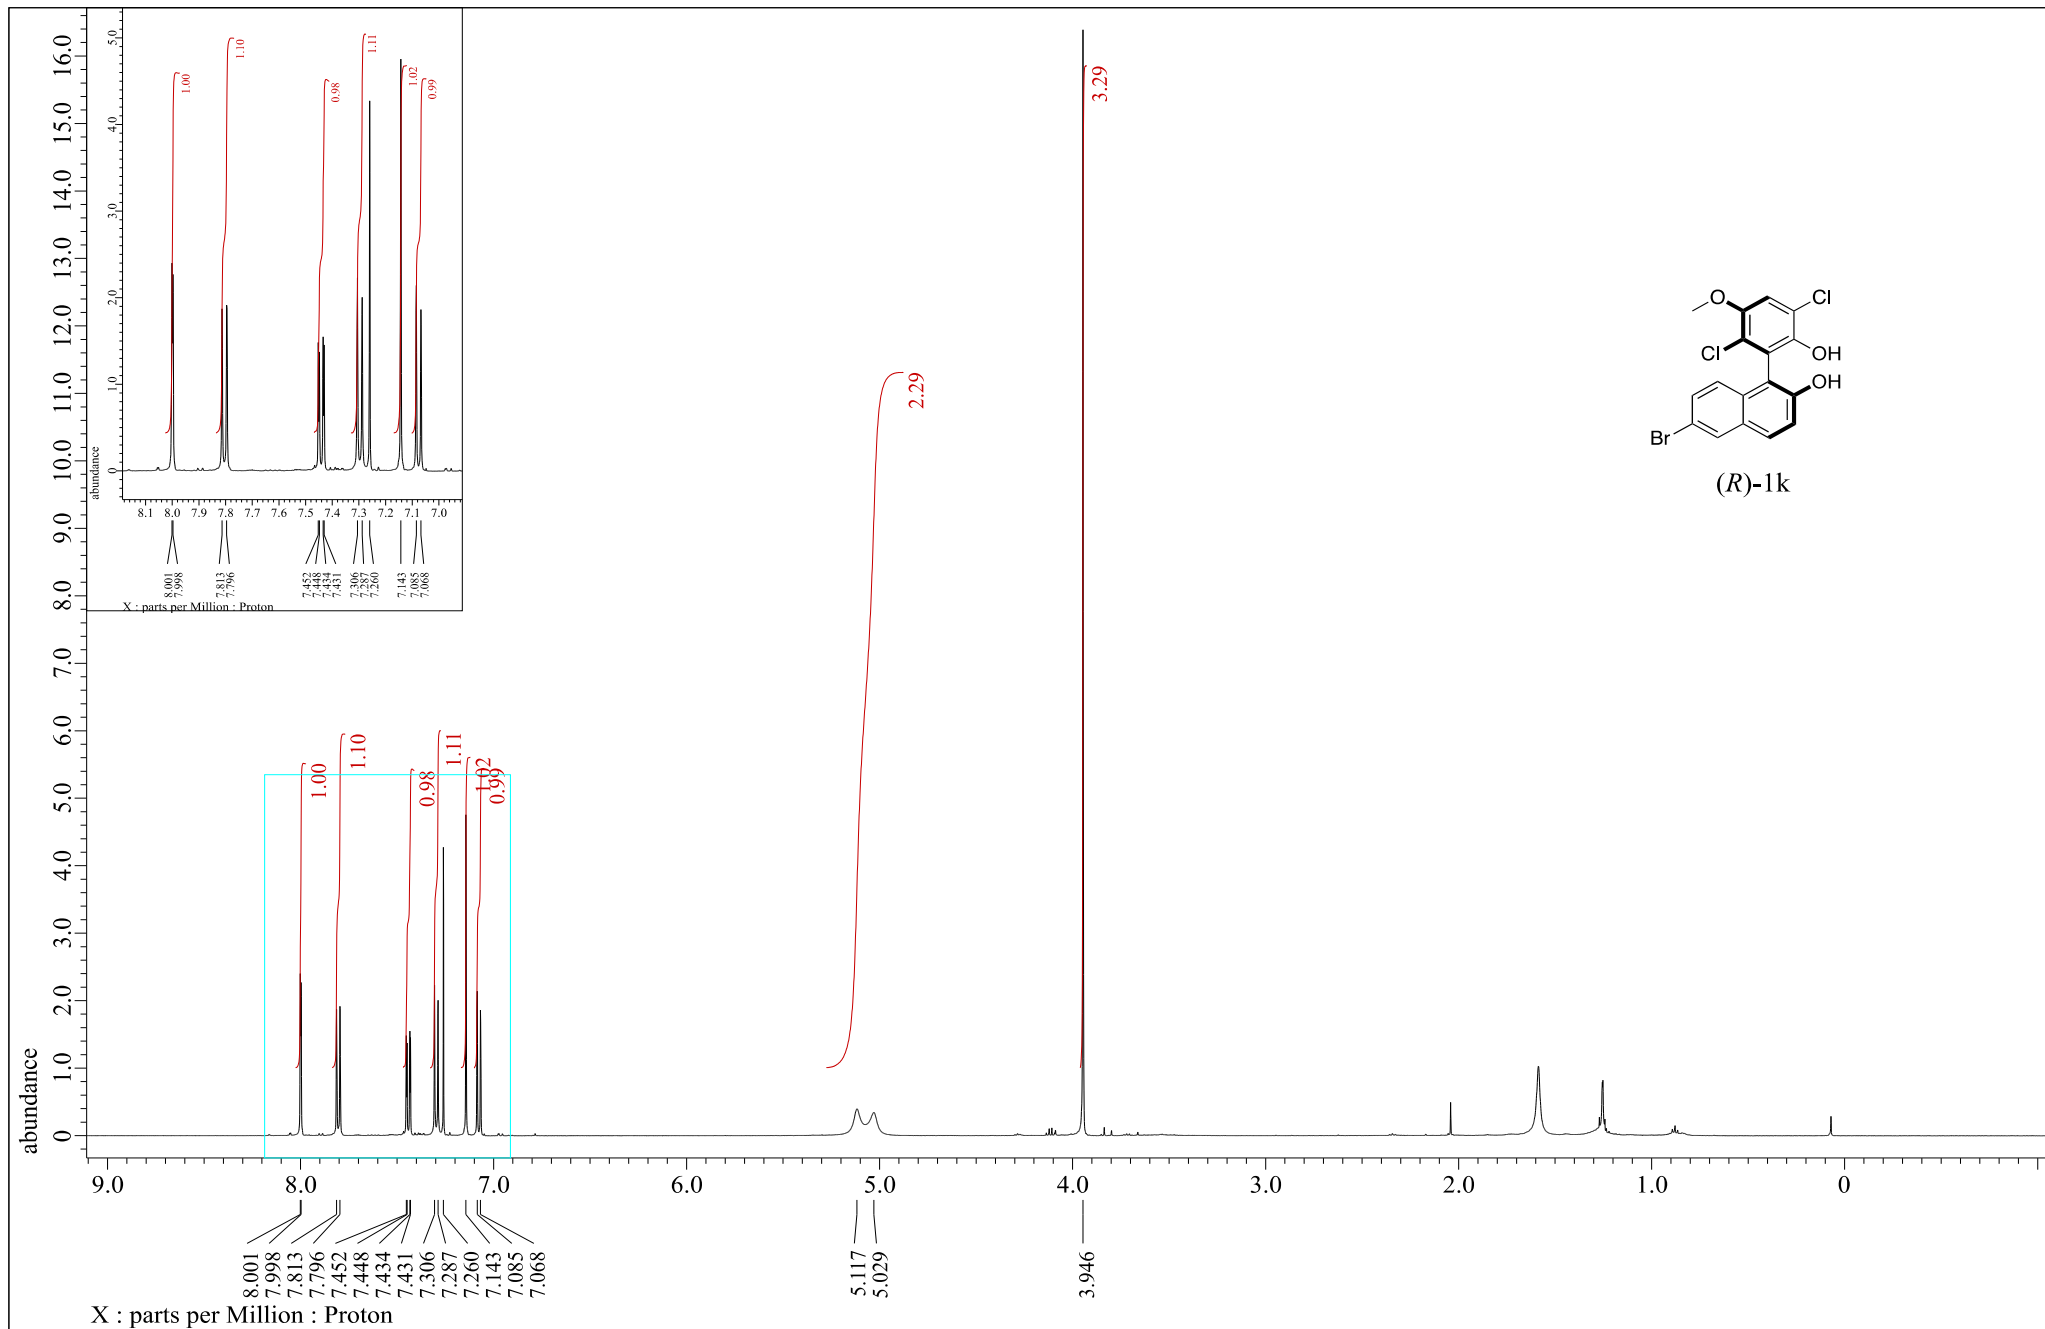

<sup>1</sup>H NMR spectrum (500 MHz, CDCl<sub>3</sub>) of (R)-1k

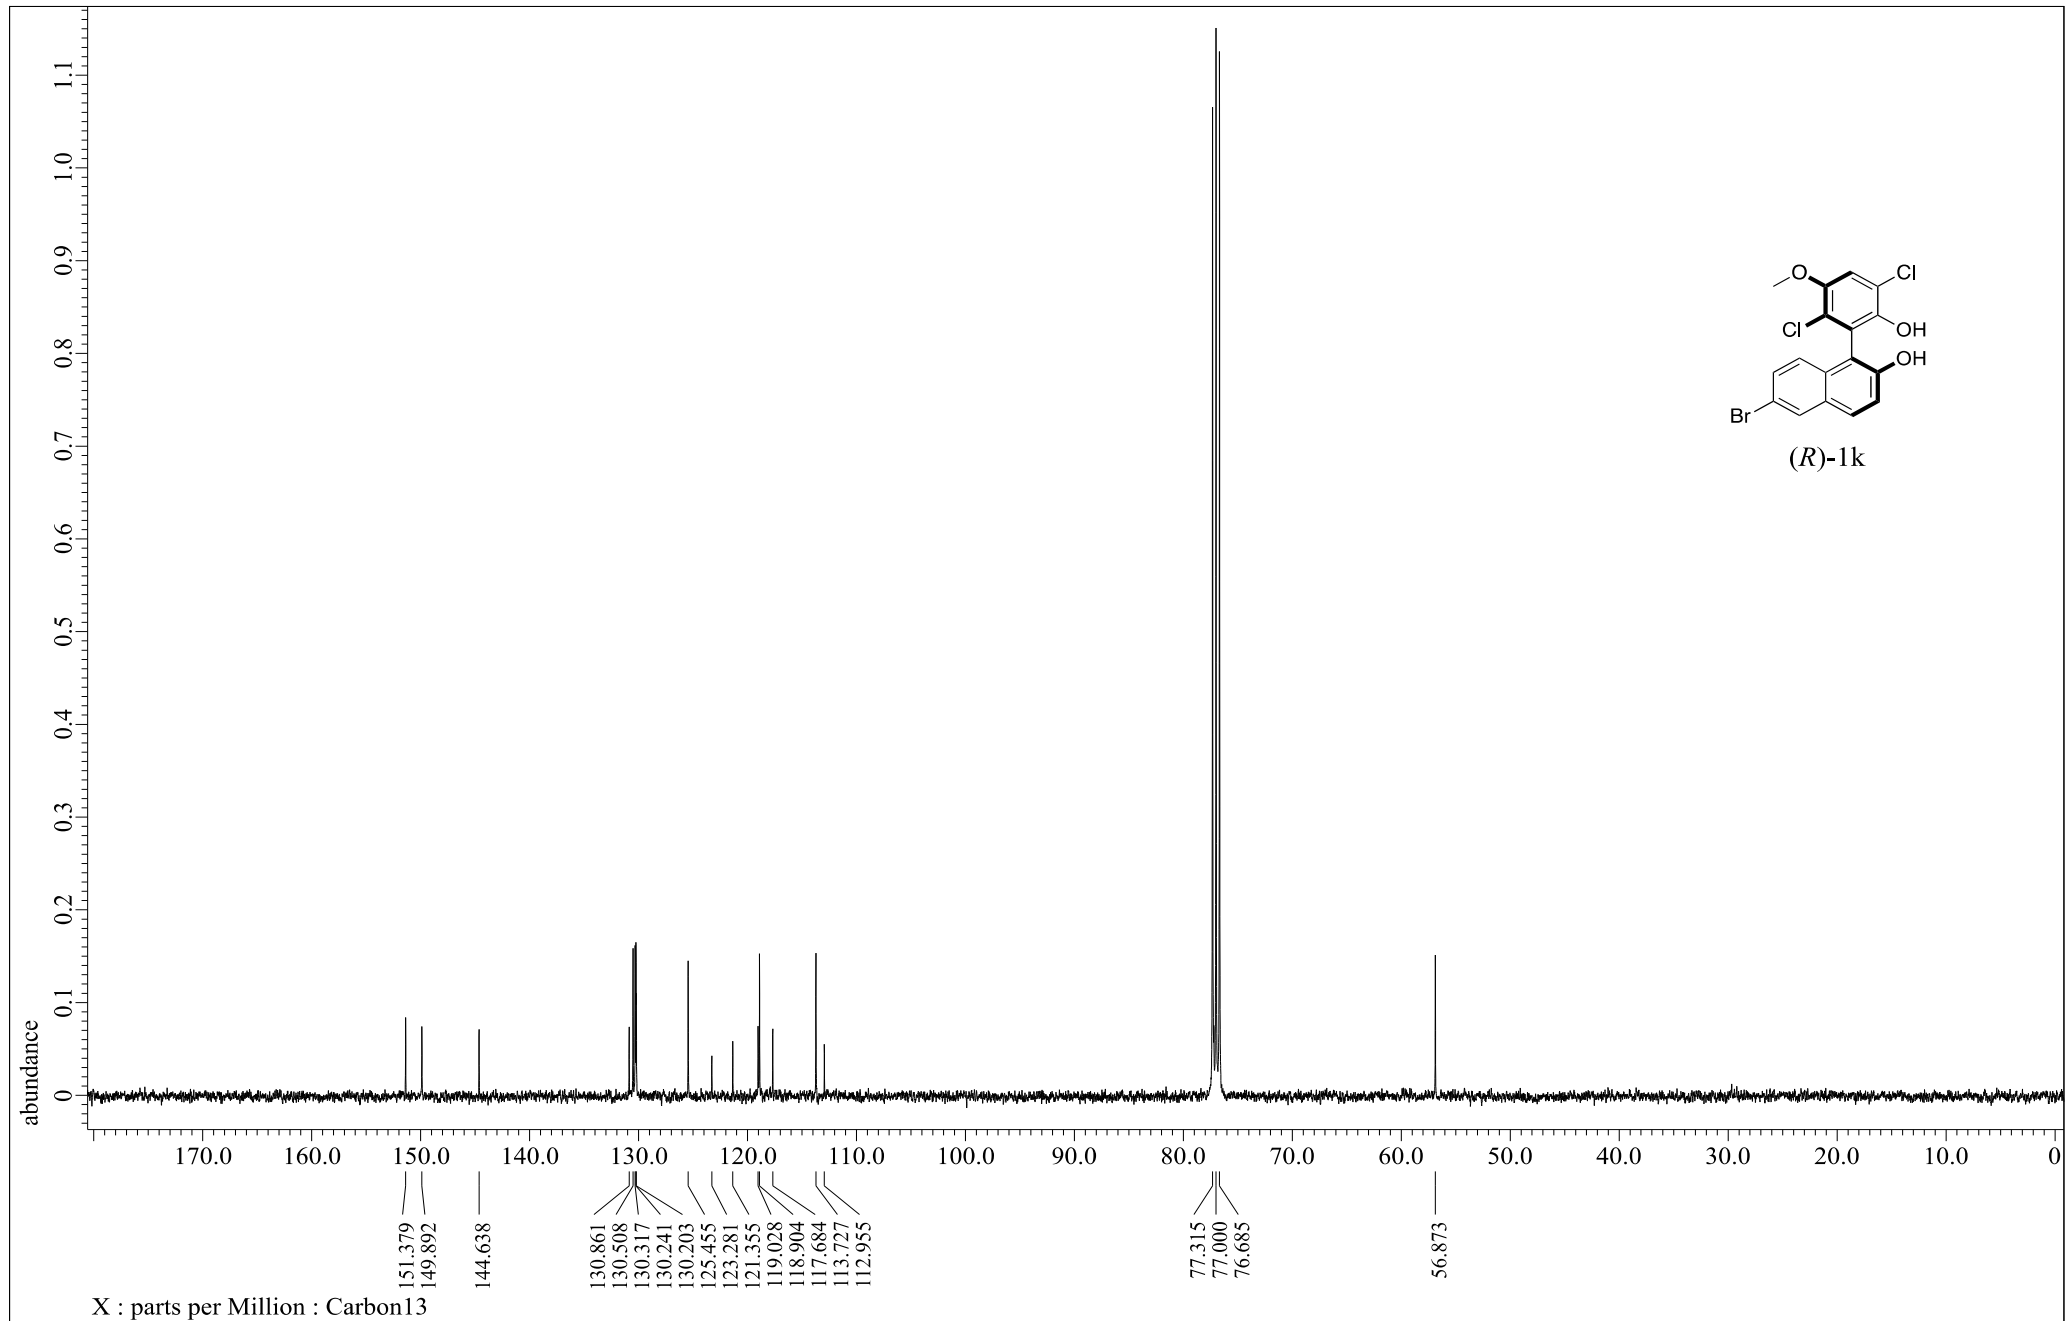

$^{13}\text{C}$  NMR spectrum (100 MHz,  $\text{CDCl}_3$ ) of *(R)*-1k

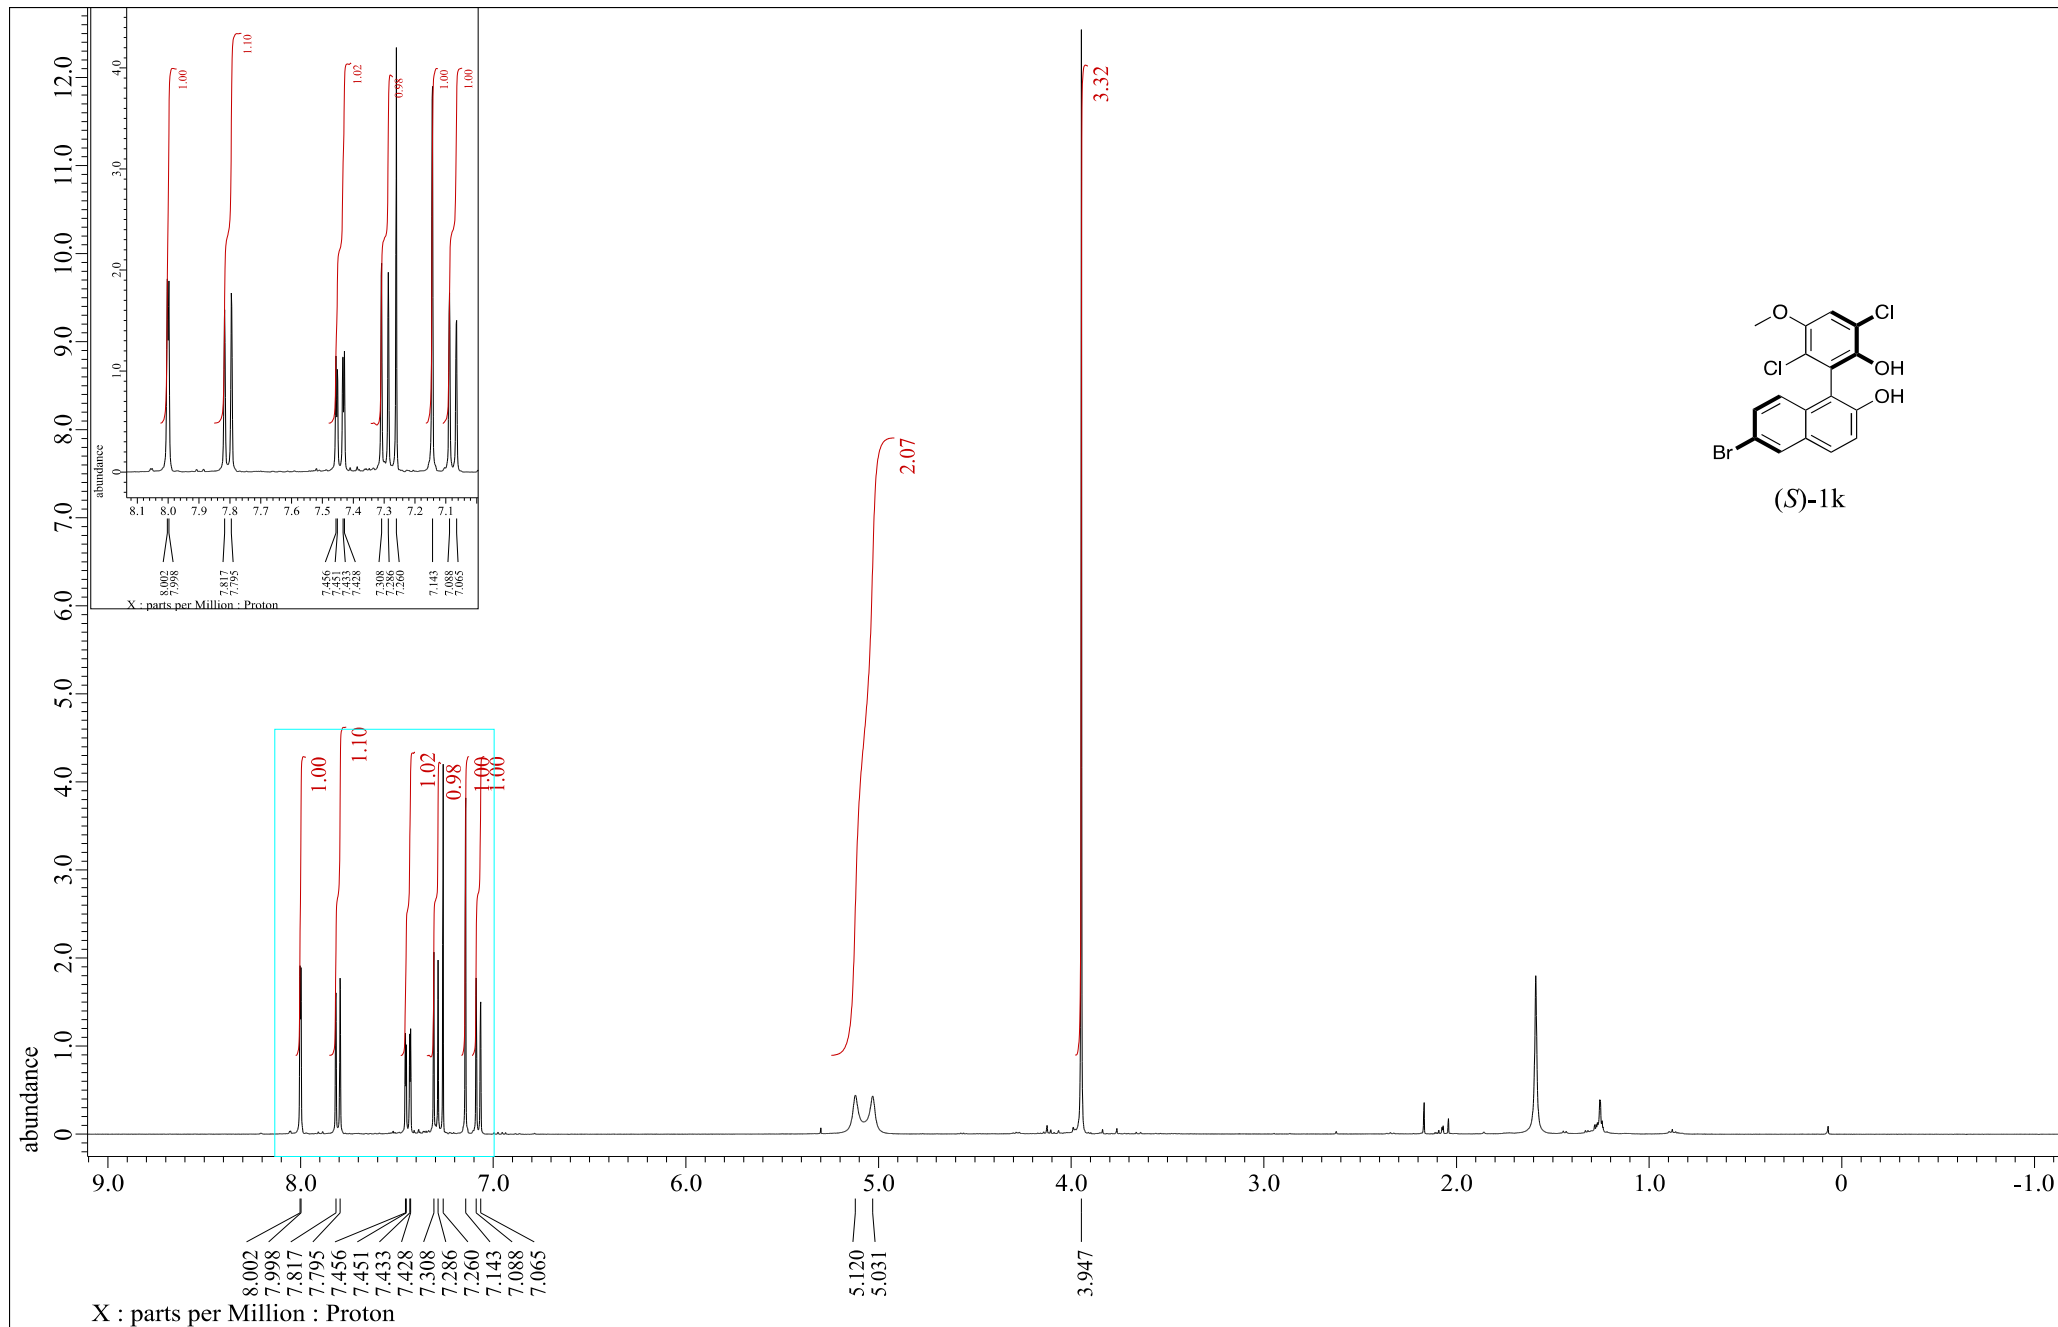

$^1\text{H}$  NMR spectrum (400 MHz,  $\text{CDCl}_3$ ) of (S)-1k

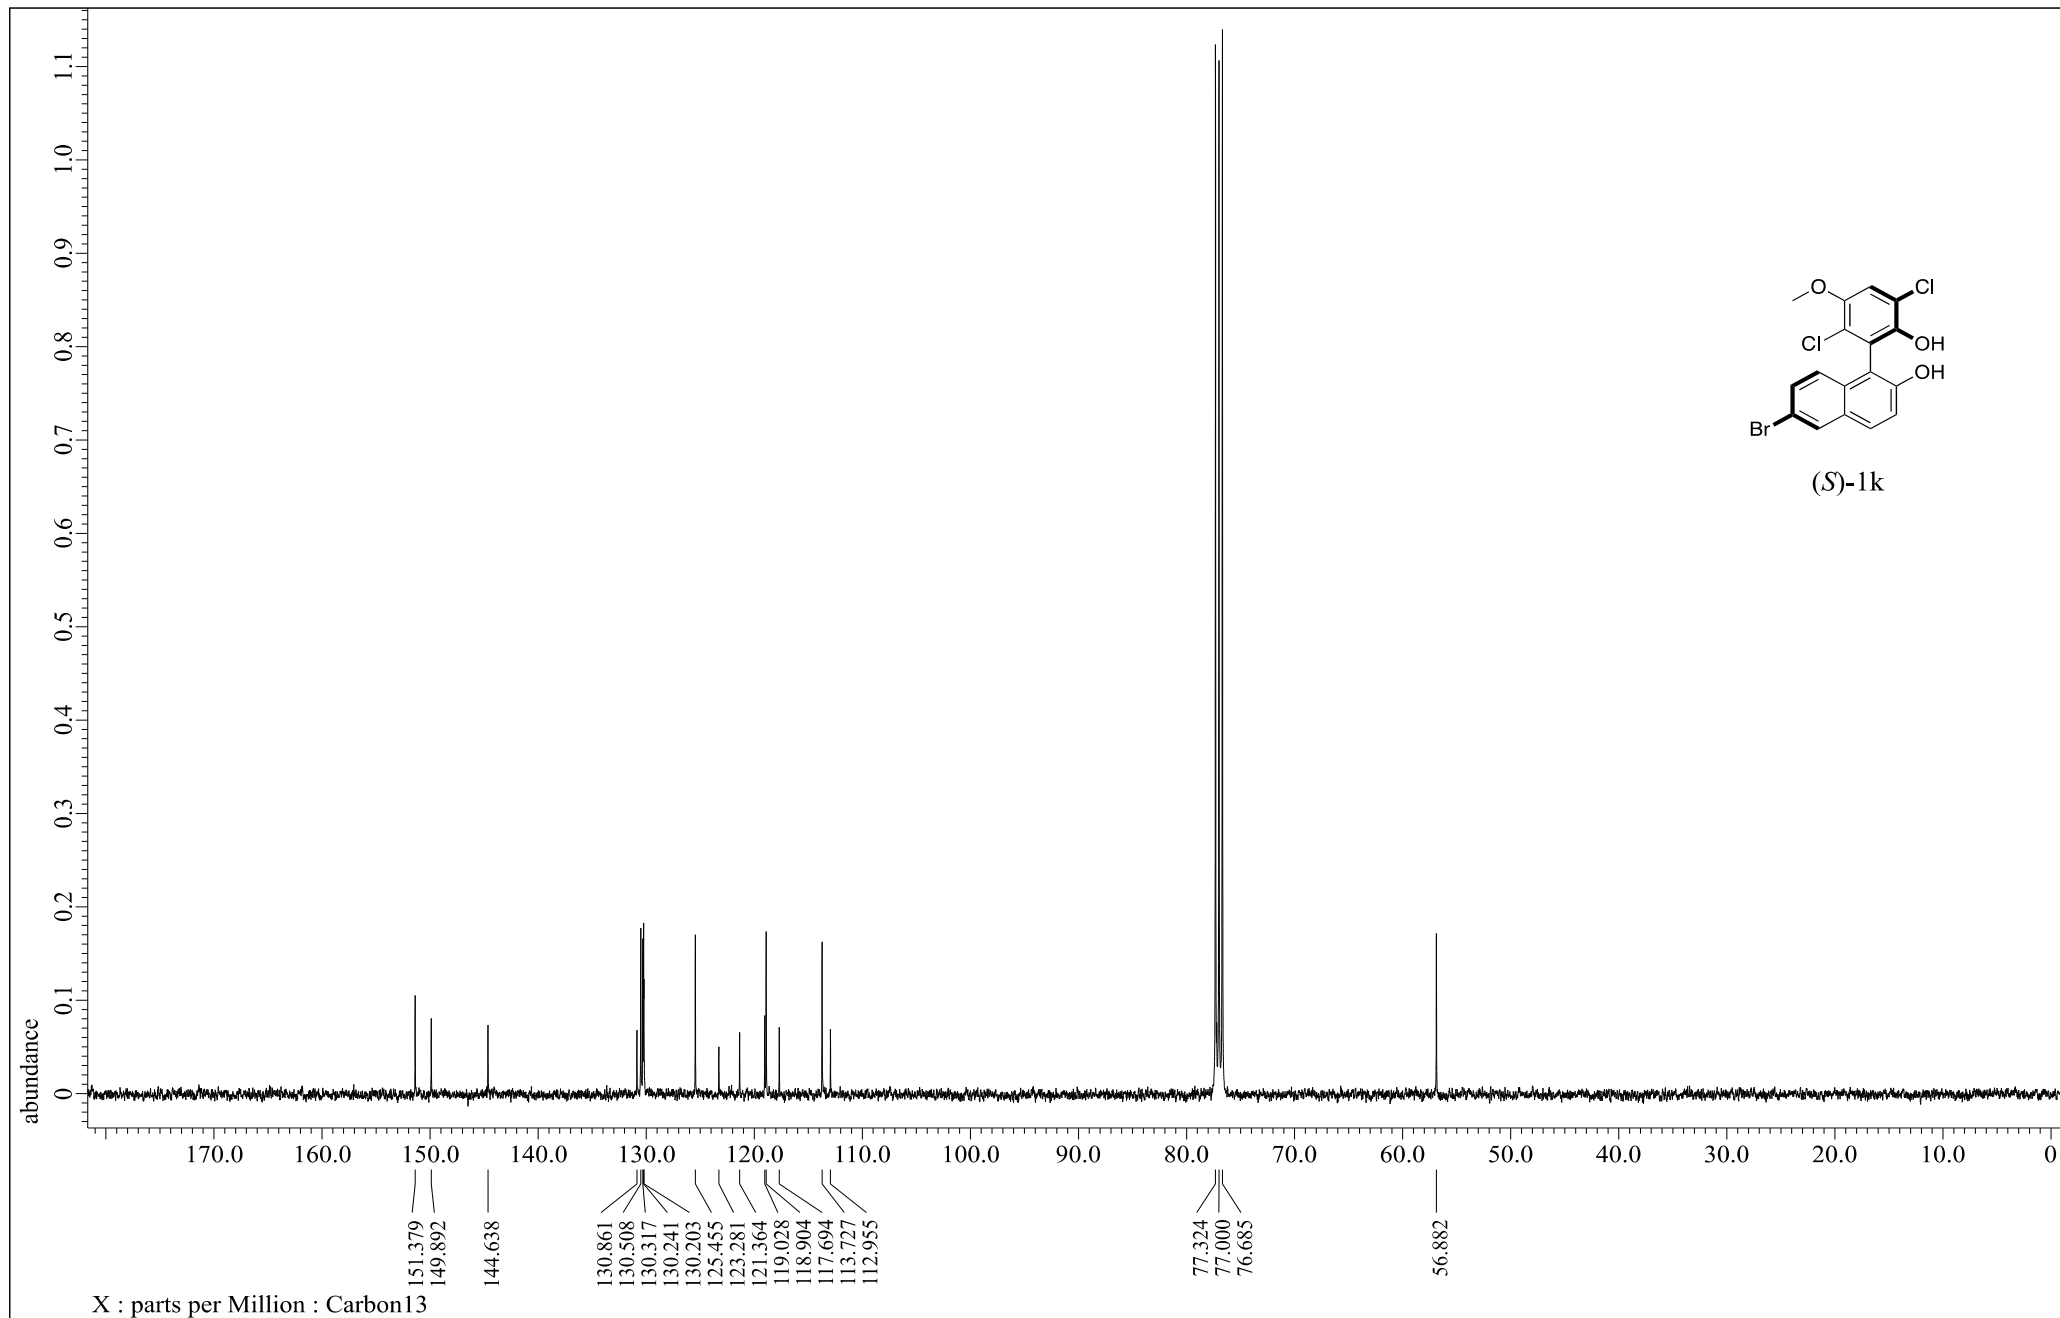

$^{13}\text{C}$  NMR spectrum (100 MHz,  $\text{CDCl}_3$ ) of (S)-1k

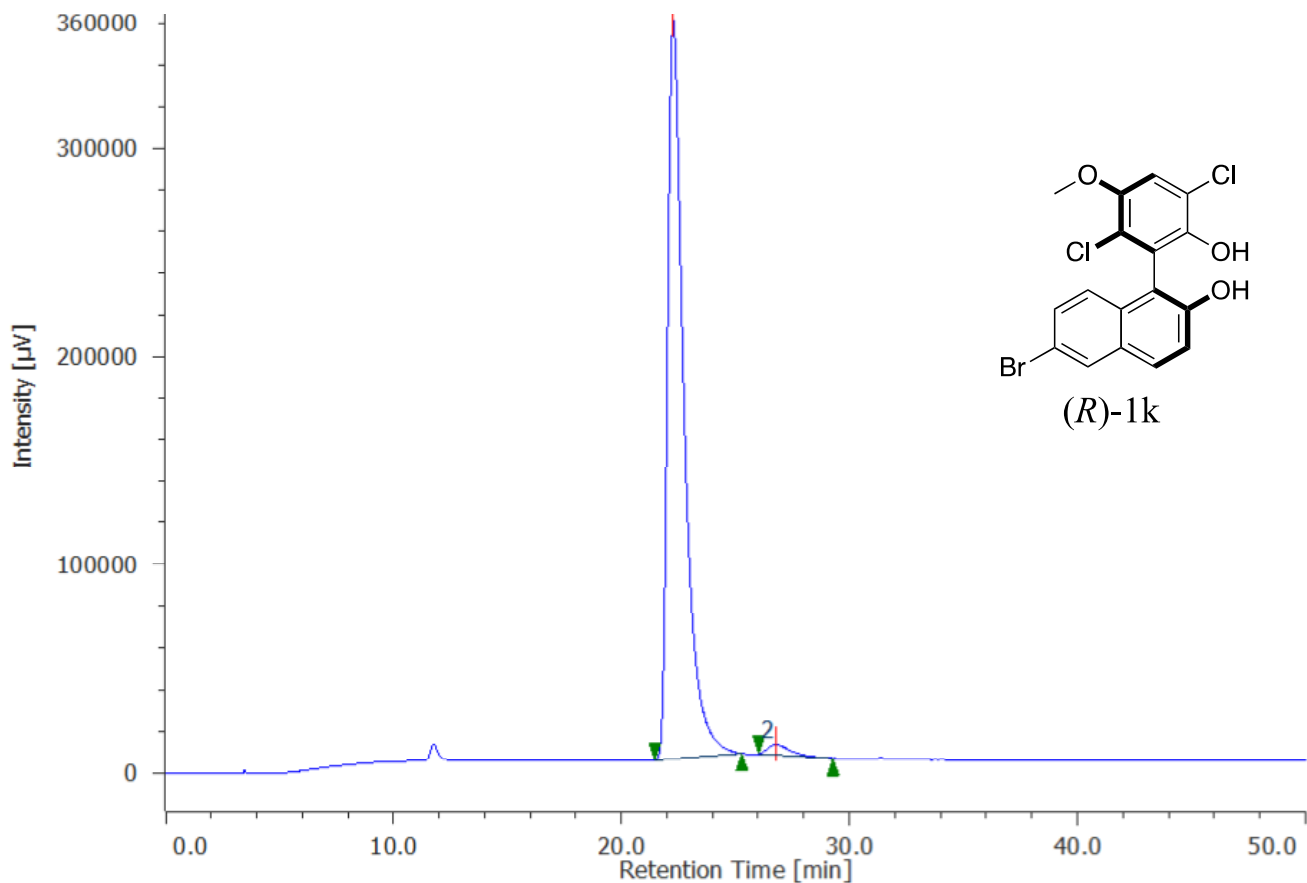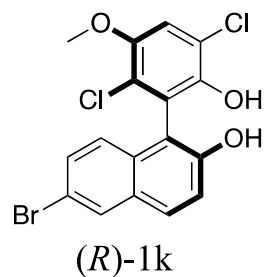

| # | ピーク名    | CH | tR [min] | 面積 [μV·sec] | 高さ [μV] | 面積%    | 高さ%    | 定量値 | NTP  | 分離度   | シンメトリー係数 | 警告 |
|---|---------|----|----------|-------------|---------|--------|--------|-----|------|-------|----------|----|
| 1 | Unknown | 9  | 22.270   | 17900836    | 354826  | 98.155 | 98.644 | N/A | 5240 | 2.984 | 1.898    |    |
| 2 | Unknown | 9  | 26.777   | 336494      | 4878    | 1.845  | 1.356  | N/A | 3549 | N/A   | 1.640    |    |

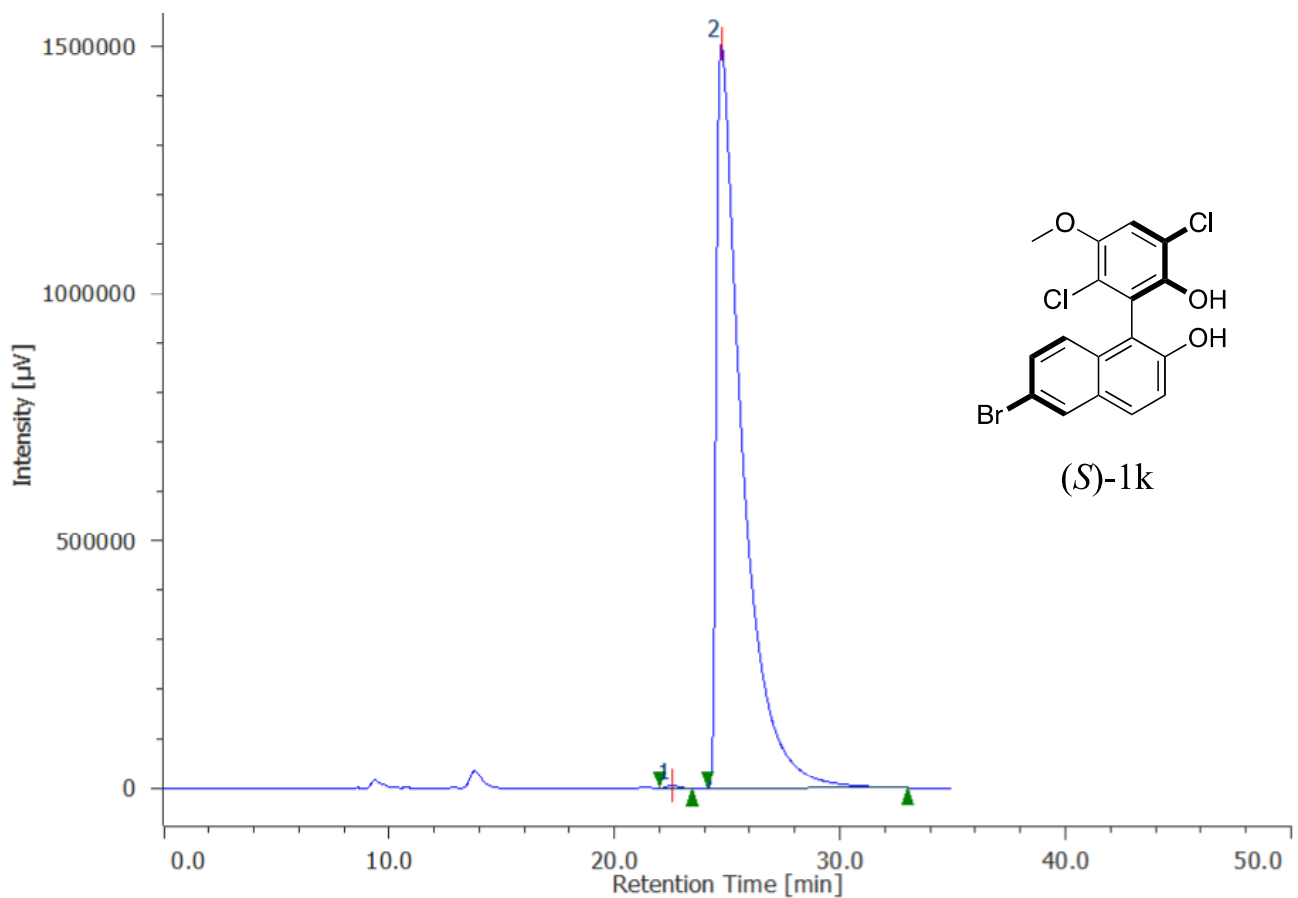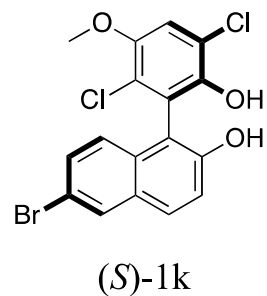

| # | ピーク名    | CH | tR [min] | 面積 [μV·sec] | 高さ [μV] | 面積%    | 高さ%    | 定量値 | NTP  | 分離度   | シンメトリー係数 | 警告 |
|---|---------|----|----------|-------------|---------|--------|--------|-----|------|-------|----------|----|
| 1 | Unknown | 9  | 22.540   | 202886      | 5313    | 0.169  | 0.352  | N/A | 7690 | 1.528 | 1.284    |    |
| 2 | Unknown | 9  | 24.743   | 120046402   | 1504739 | 99.831 | 99.648 | N/A | 2822 | N/A   | 3.920    |    |

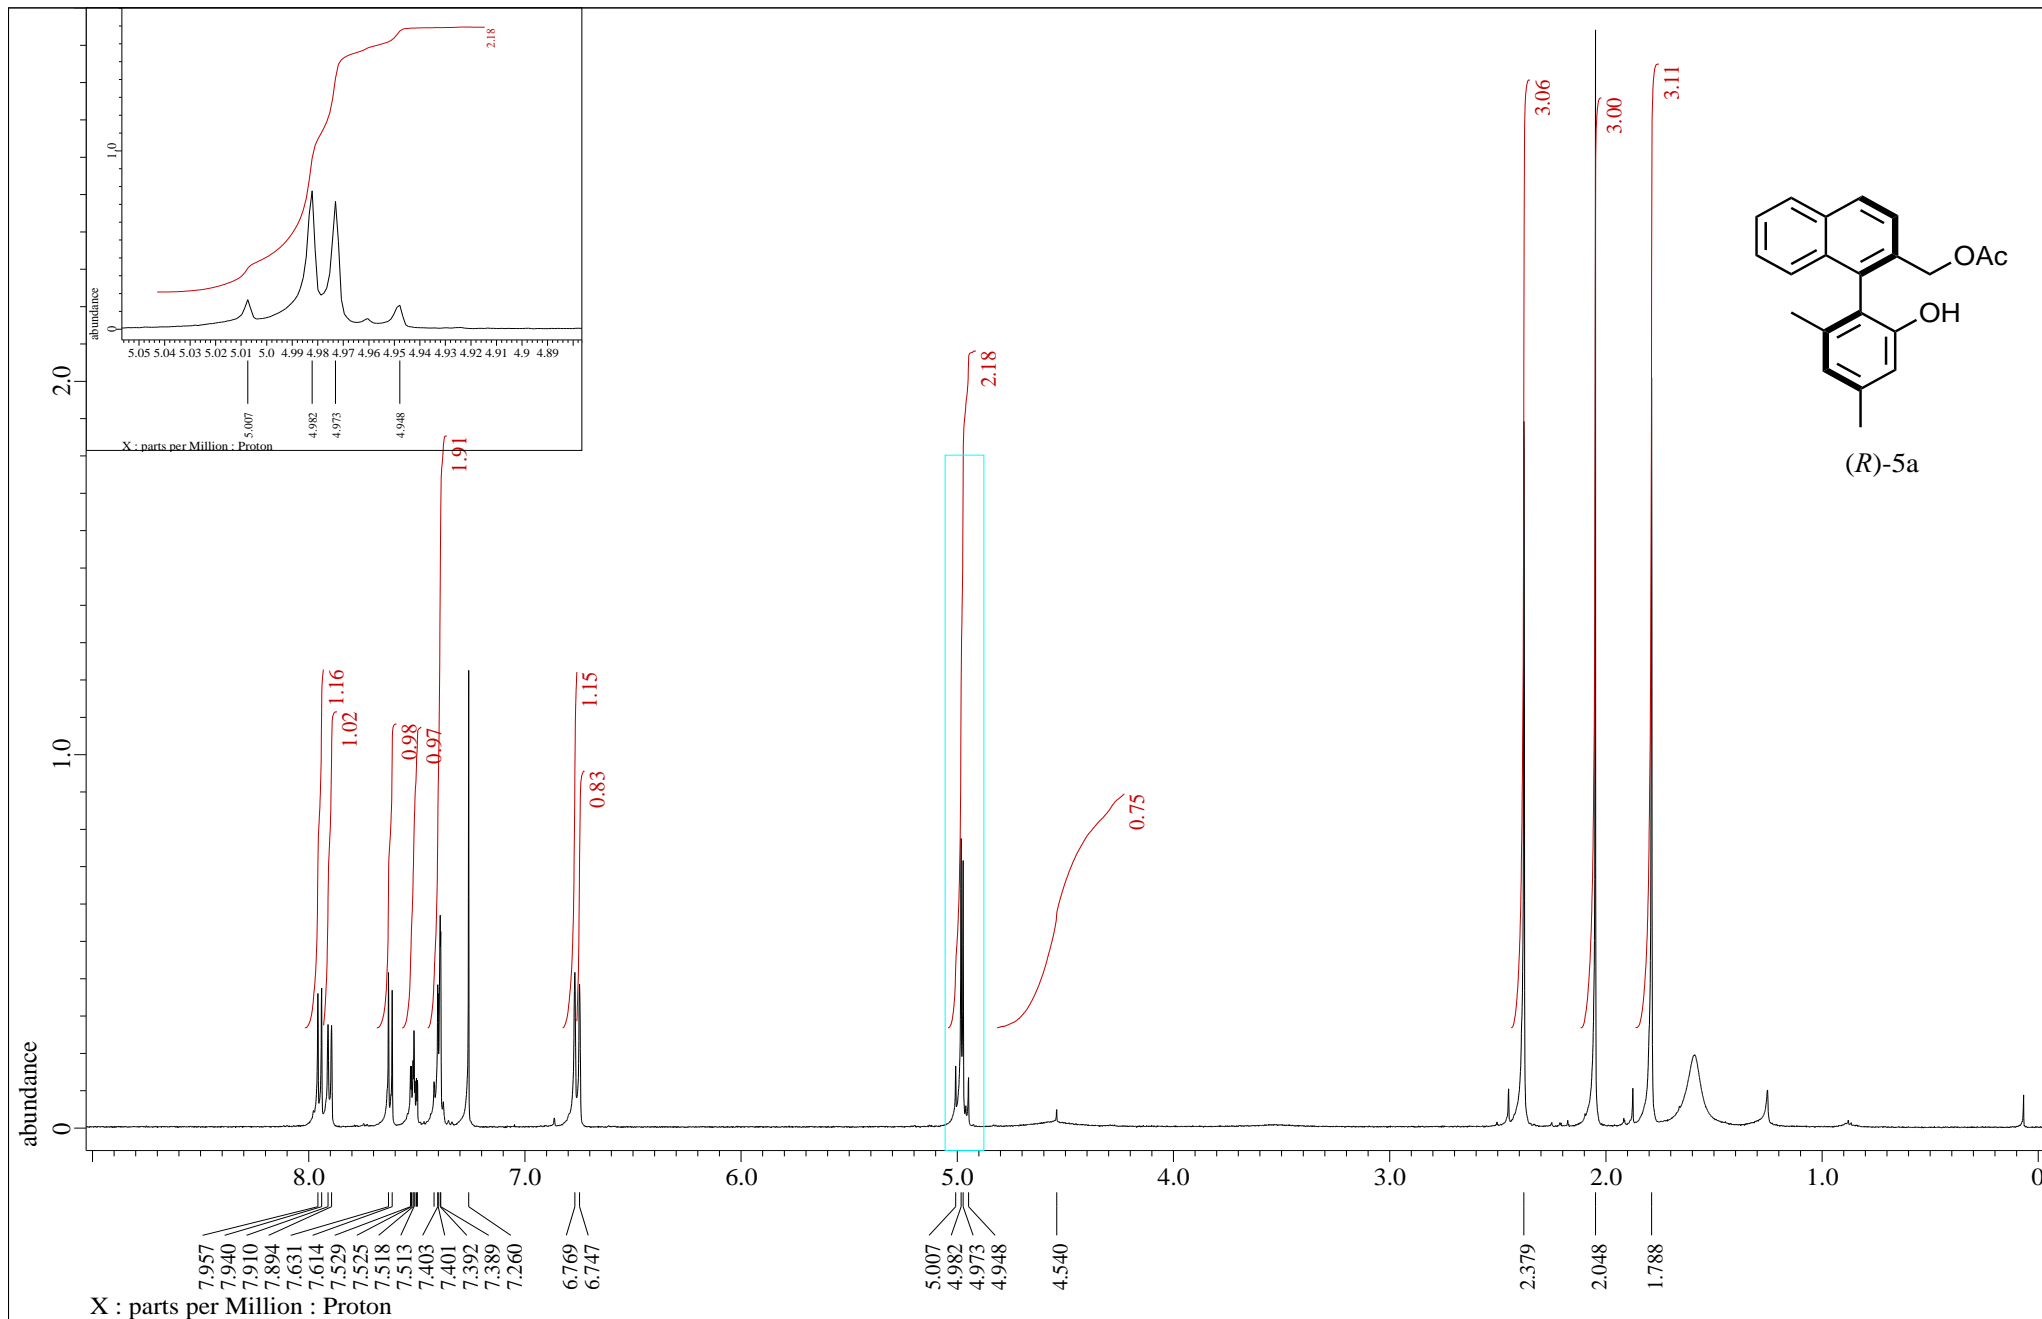

<sup>1</sup>H NMR spectrum (500 MHz, CDCl<sub>3</sub>) of (R)-5a



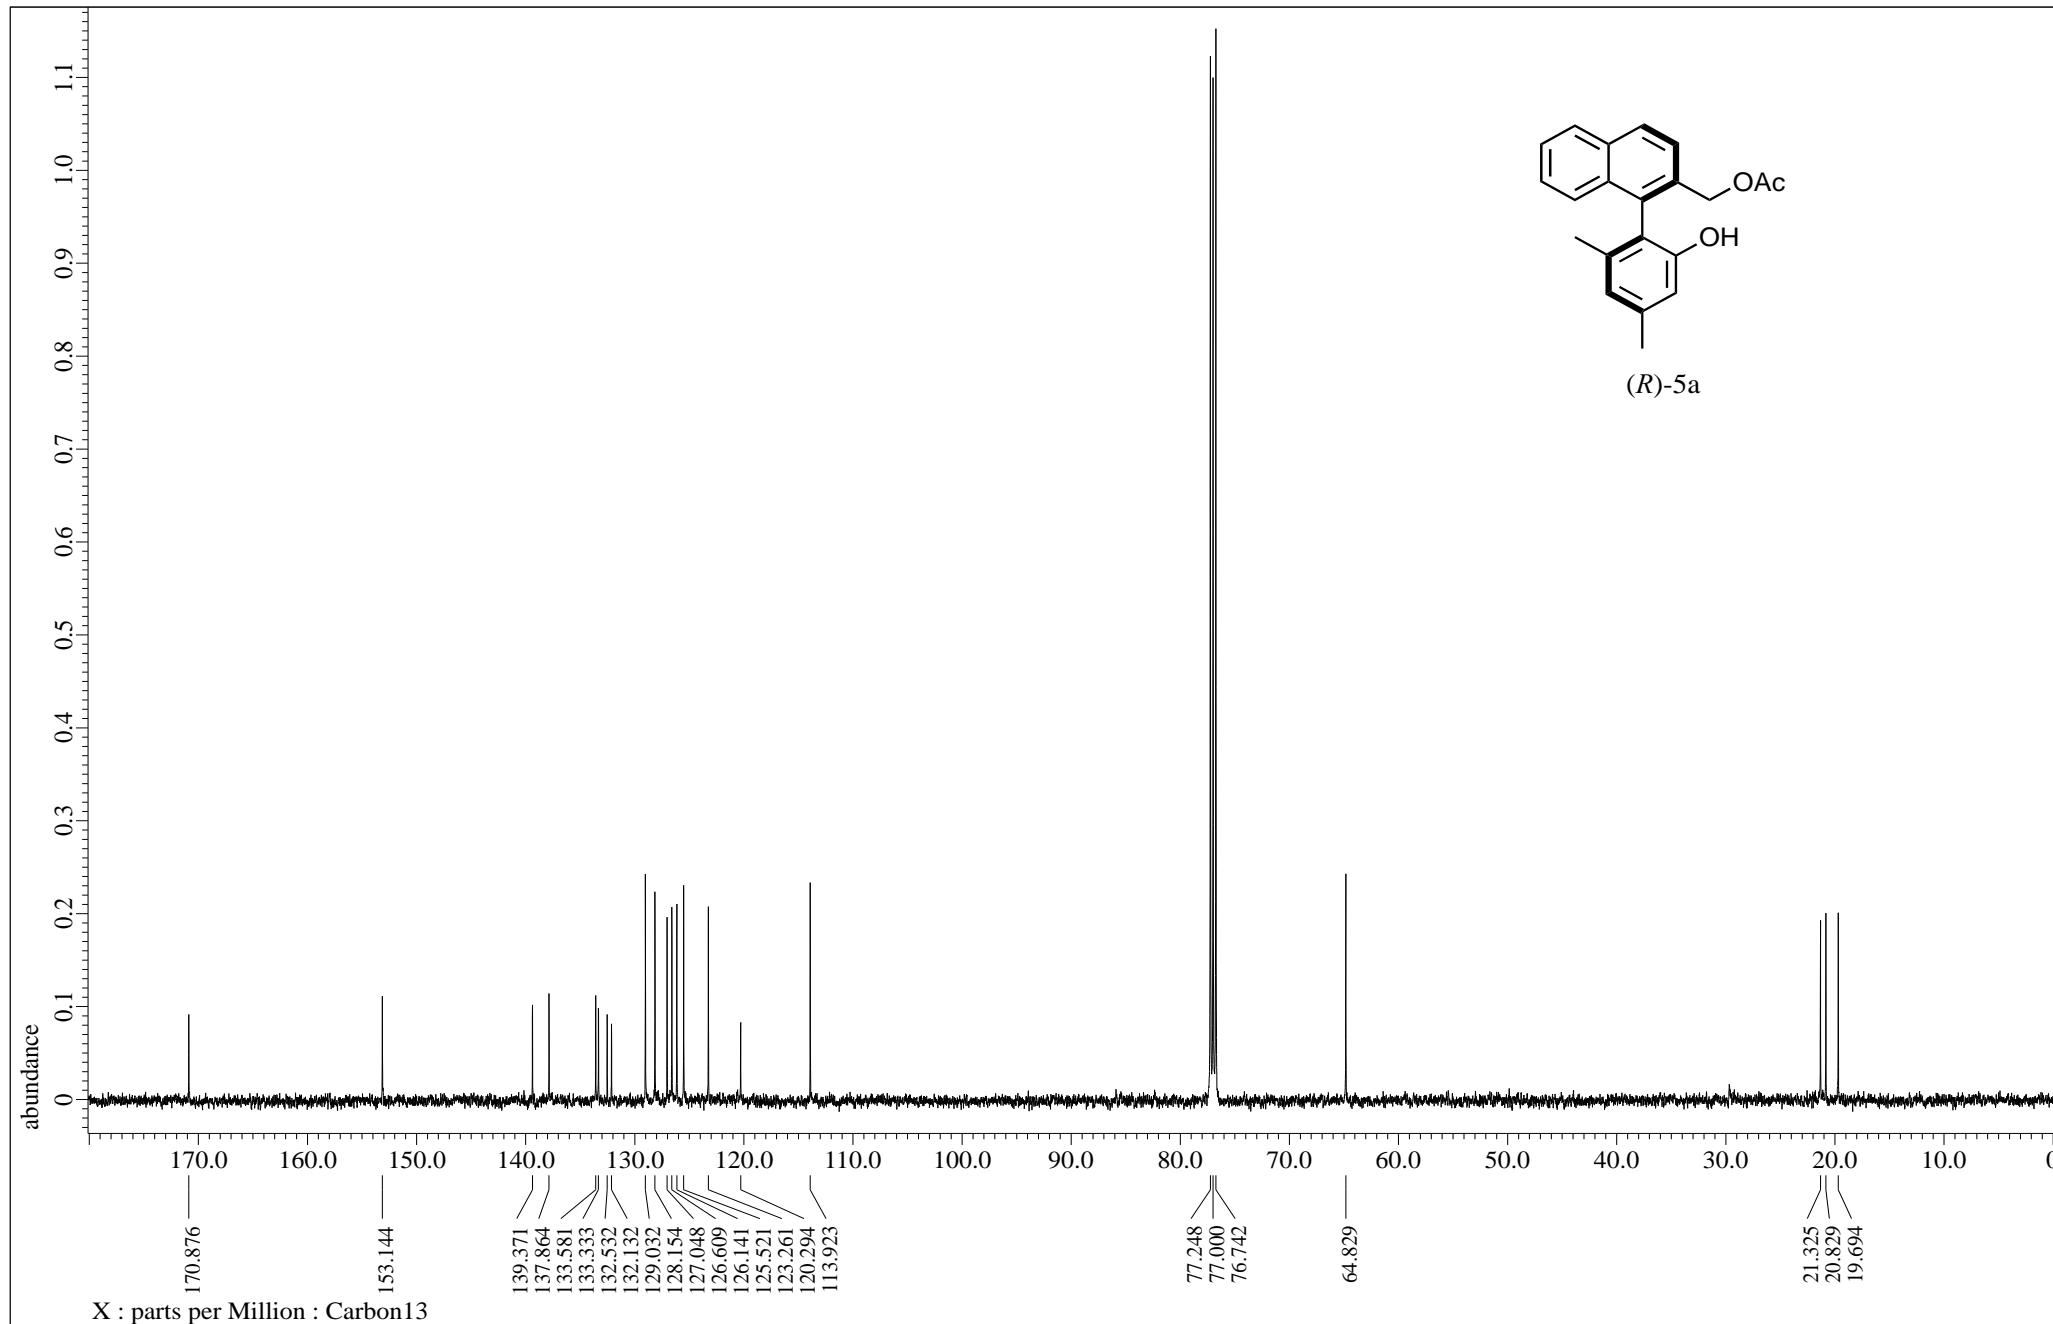

$^{13}\text{C}$  NMR spectrum (125 MHz,  $\text{CDCl}_3$ ) of (R)-5a

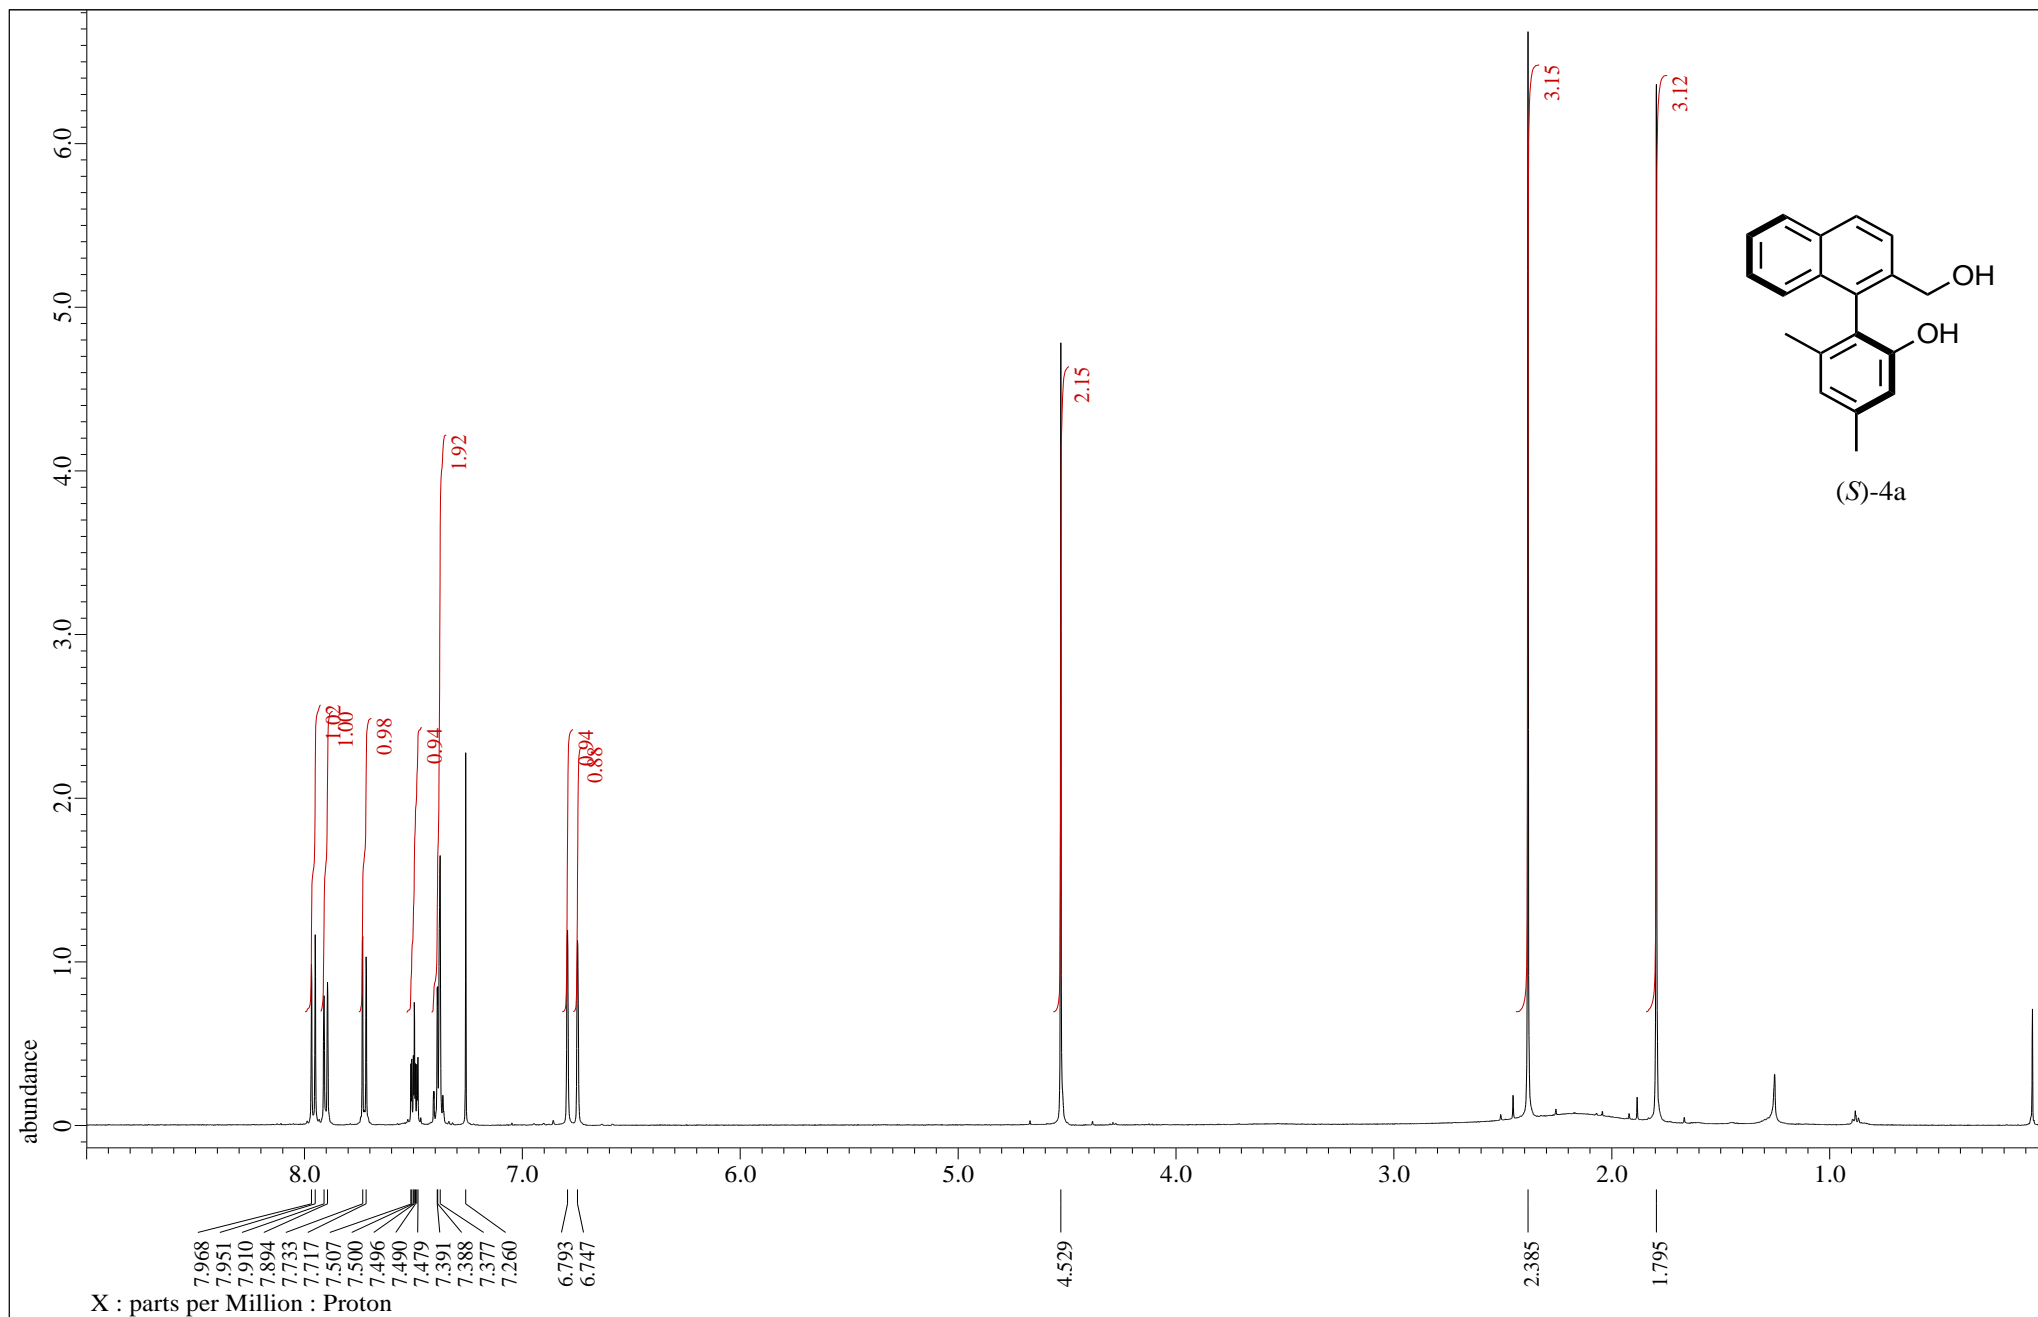

$^1\text{H}$  NMR spectrum (400 MHz,  $\text{CDCl}_3$ ) of (S)-4a

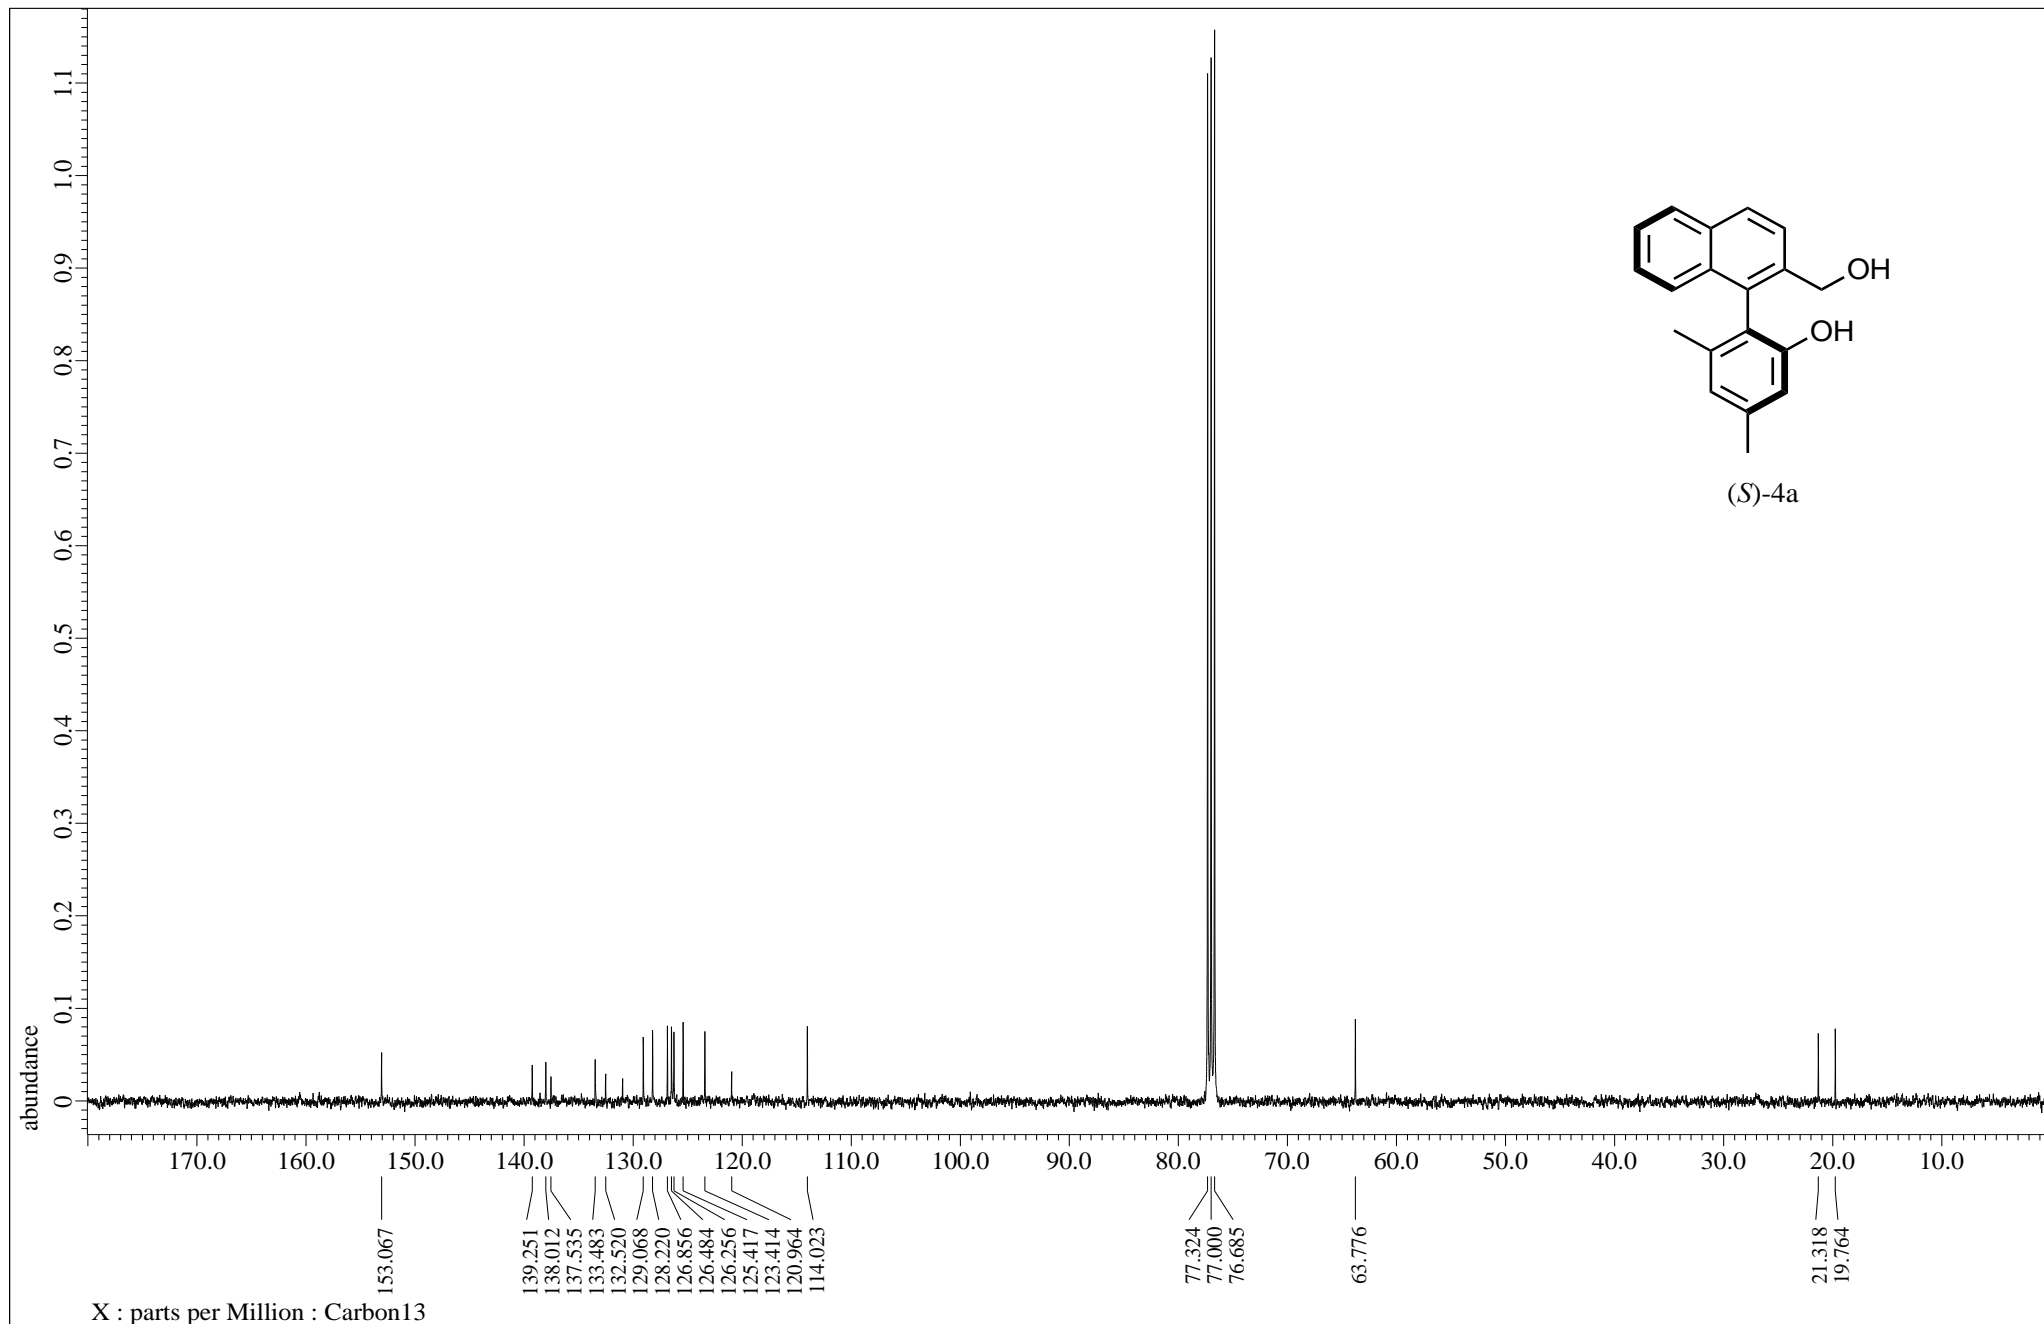

$^{13}\text{C}$  NMR spectrum (100 MHz,  $\text{CDCl}_3$ ) of (S)-4a

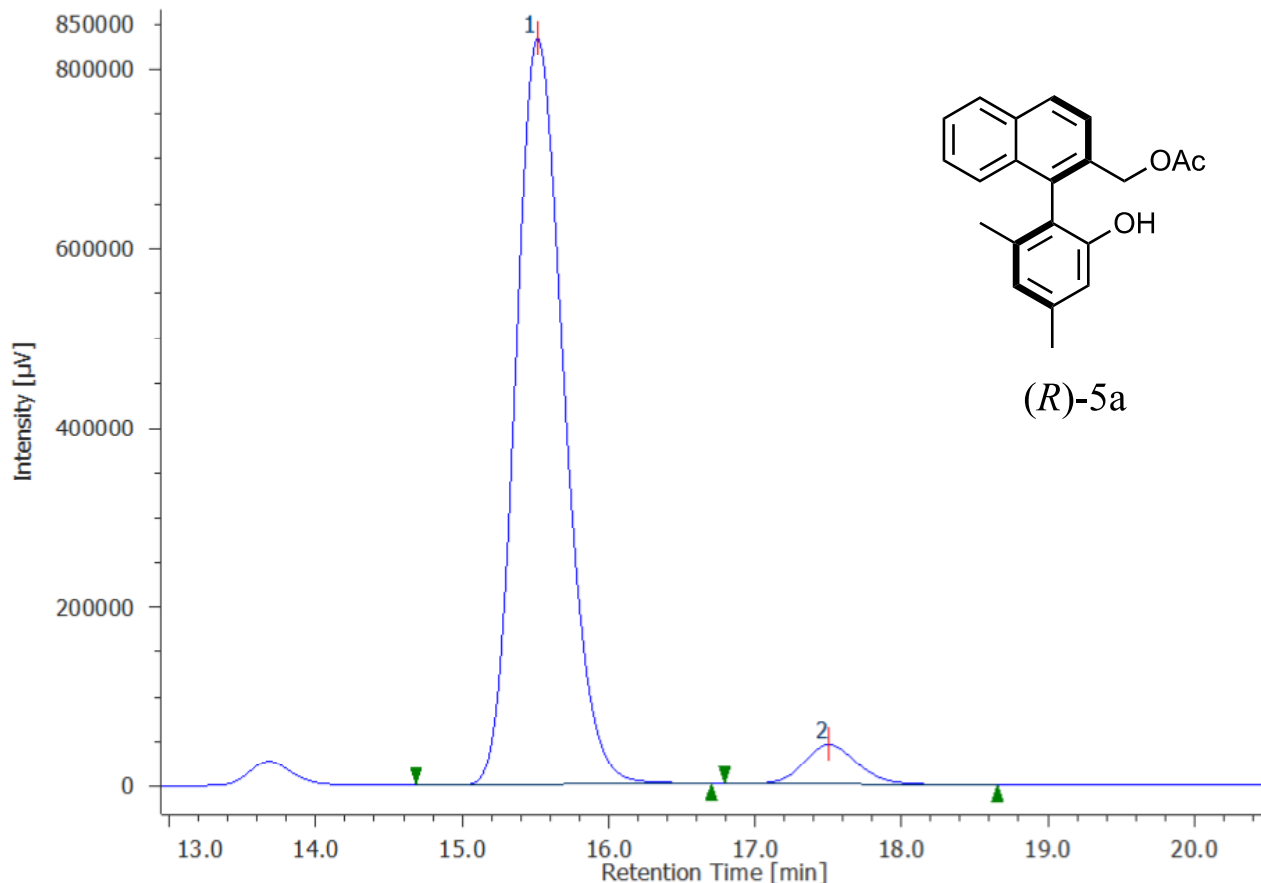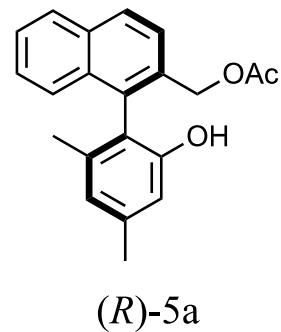

| # | ピーク名    | CH | tR [min] | 面積 [ $\mu\text{V}\cdot\text{sec}$ ] | 高さ [ $\mu\text{V}$ ] | 面積%    | 高さ%    | 定量値 | NTP   | 分離度   | シンメトリー係数 | 警告 |
|---|---------|----|----------|-------------------------------------|----------------------|--------|--------|-----|-------|-------|----------|----|
| 1 | Unknown | 9  | 15.513   | 19103734                            | 832754               | 94.470 | 94.955 | N/A | 10601 | 3.166 | 1.189    |    |
| 2 | Unknown | 9  | 17.503   | 1118358                             | 44249                | 5.530  | 5.045  | N/A | 11325 | N/A   | 1.109    |    |

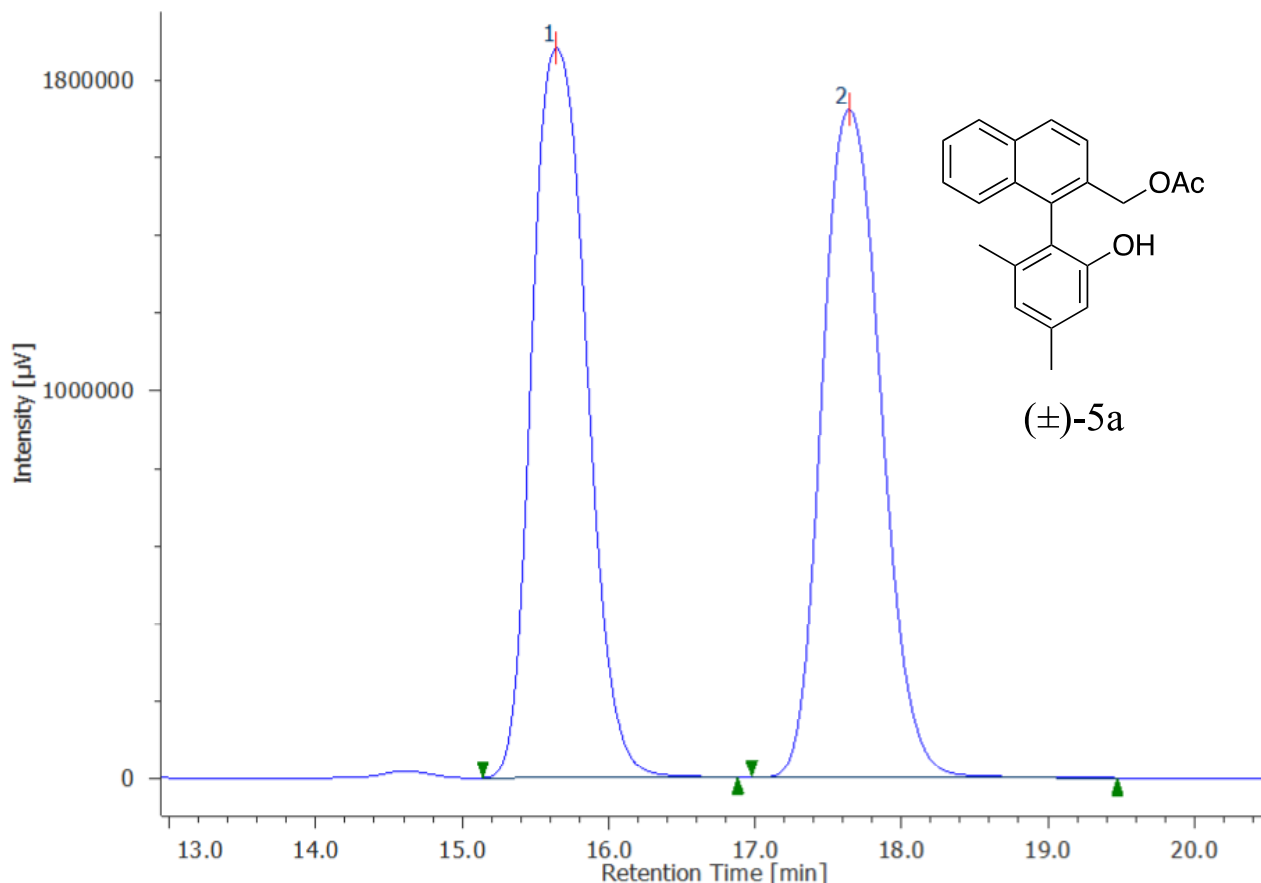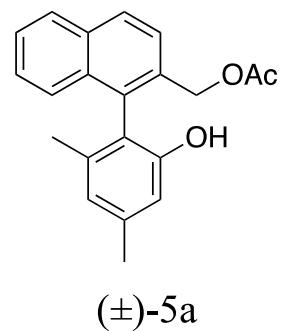

| # | ピーク名    | CH | tR [min] | 面積 [ $\mu\text{V}\cdot\text{sec}$ ] | 高さ [ $\mu\text{V}$ ] | 面積%    | 高さ%    | 定量値 | NTP  | 分離度   | シンメトリー係数 | 警告 |
|---|---------|----|----------|-------------------------------------|----------------------|--------|--------|-----|------|-------|----------|----|
| 1 | Unknown | 9  | 15.643   | 48950183                            | 1879216              | 50.307 | 52.239 | N/A | 7946 | 2.757 | 1.195    |    |
| 2 | Unknown | 9  | 17.643   | 48351924                            | 1718137              | 49.693 | 47.761 | N/A | 8786 | N/A   | 1.159    |    |

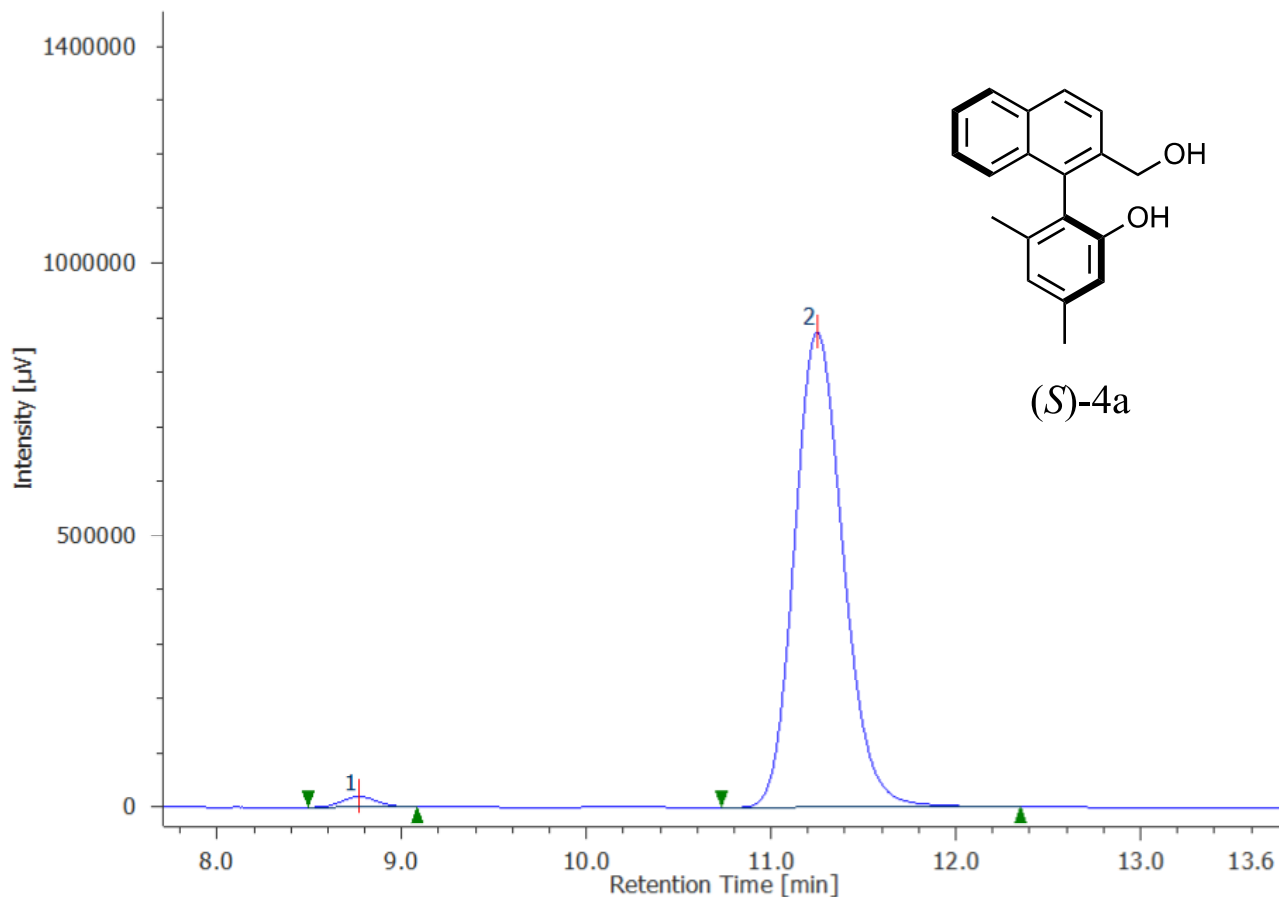

| # | ピーク名    | CH | tR [min] | 面積 [ $\mu\text{V}\cdot\text{sec}$ ] | 高さ [ $\mu\text{V}$ ] | 面積%    | 高さ%    | 定量値 | NTP  | 分離度   | シンメトリー係数 | 警告 |
|---|---------|----|----------|-------------------------------------|----------------------|--------|--------|-----|------|-------|----------|----|
| 1 | Unknown | 9  | 8.767    | 256123                              | 19129                | 1.573  | 2.141  | N/A | 9584 | 5.950 | 1.095    |    |
| 2 | Unknown | 9  | 11.247   | 16027587                            | 874469               | 98.427 | 97.859 | N/A | 8870 | N/A   | 1.167    |    |

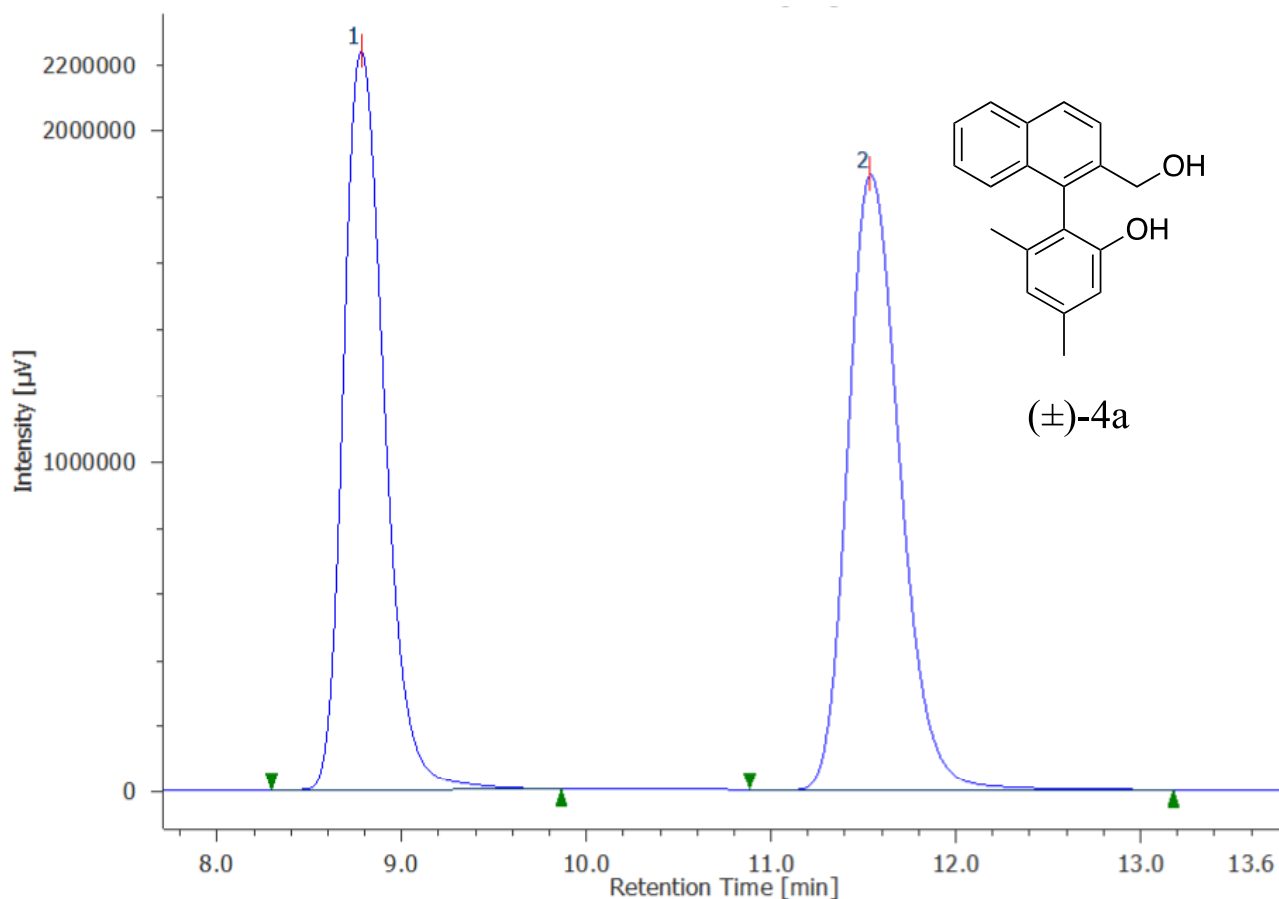

| # | ピーク名    | CH | tR [min] | 面積 [ $\mu\text{V}\cdot\text{sec}$ ] | 高さ [ $\mu\text{V}$ ] | 面積%    | 高さ%    | 定量値 | NTP  | 分離度   | シンメトリー係数 | 警告 |
|---|---------|----|----------|-------------------------------------|----------------------|--------|--------|-----|------|-------|----------|----|
| 1 | Unknown | 9  | 8.780    | 34492473                            | 2236135              | 48.547 | 54.556 | N/A | 7752 | 6.076 | 1.275    |    |
| 2 | Unknown | 9  | 11.537   | 36557345                            | 1862678              | 51.453 | 45.444 | N/A | 8160 | N/A   | 1.237    |    |

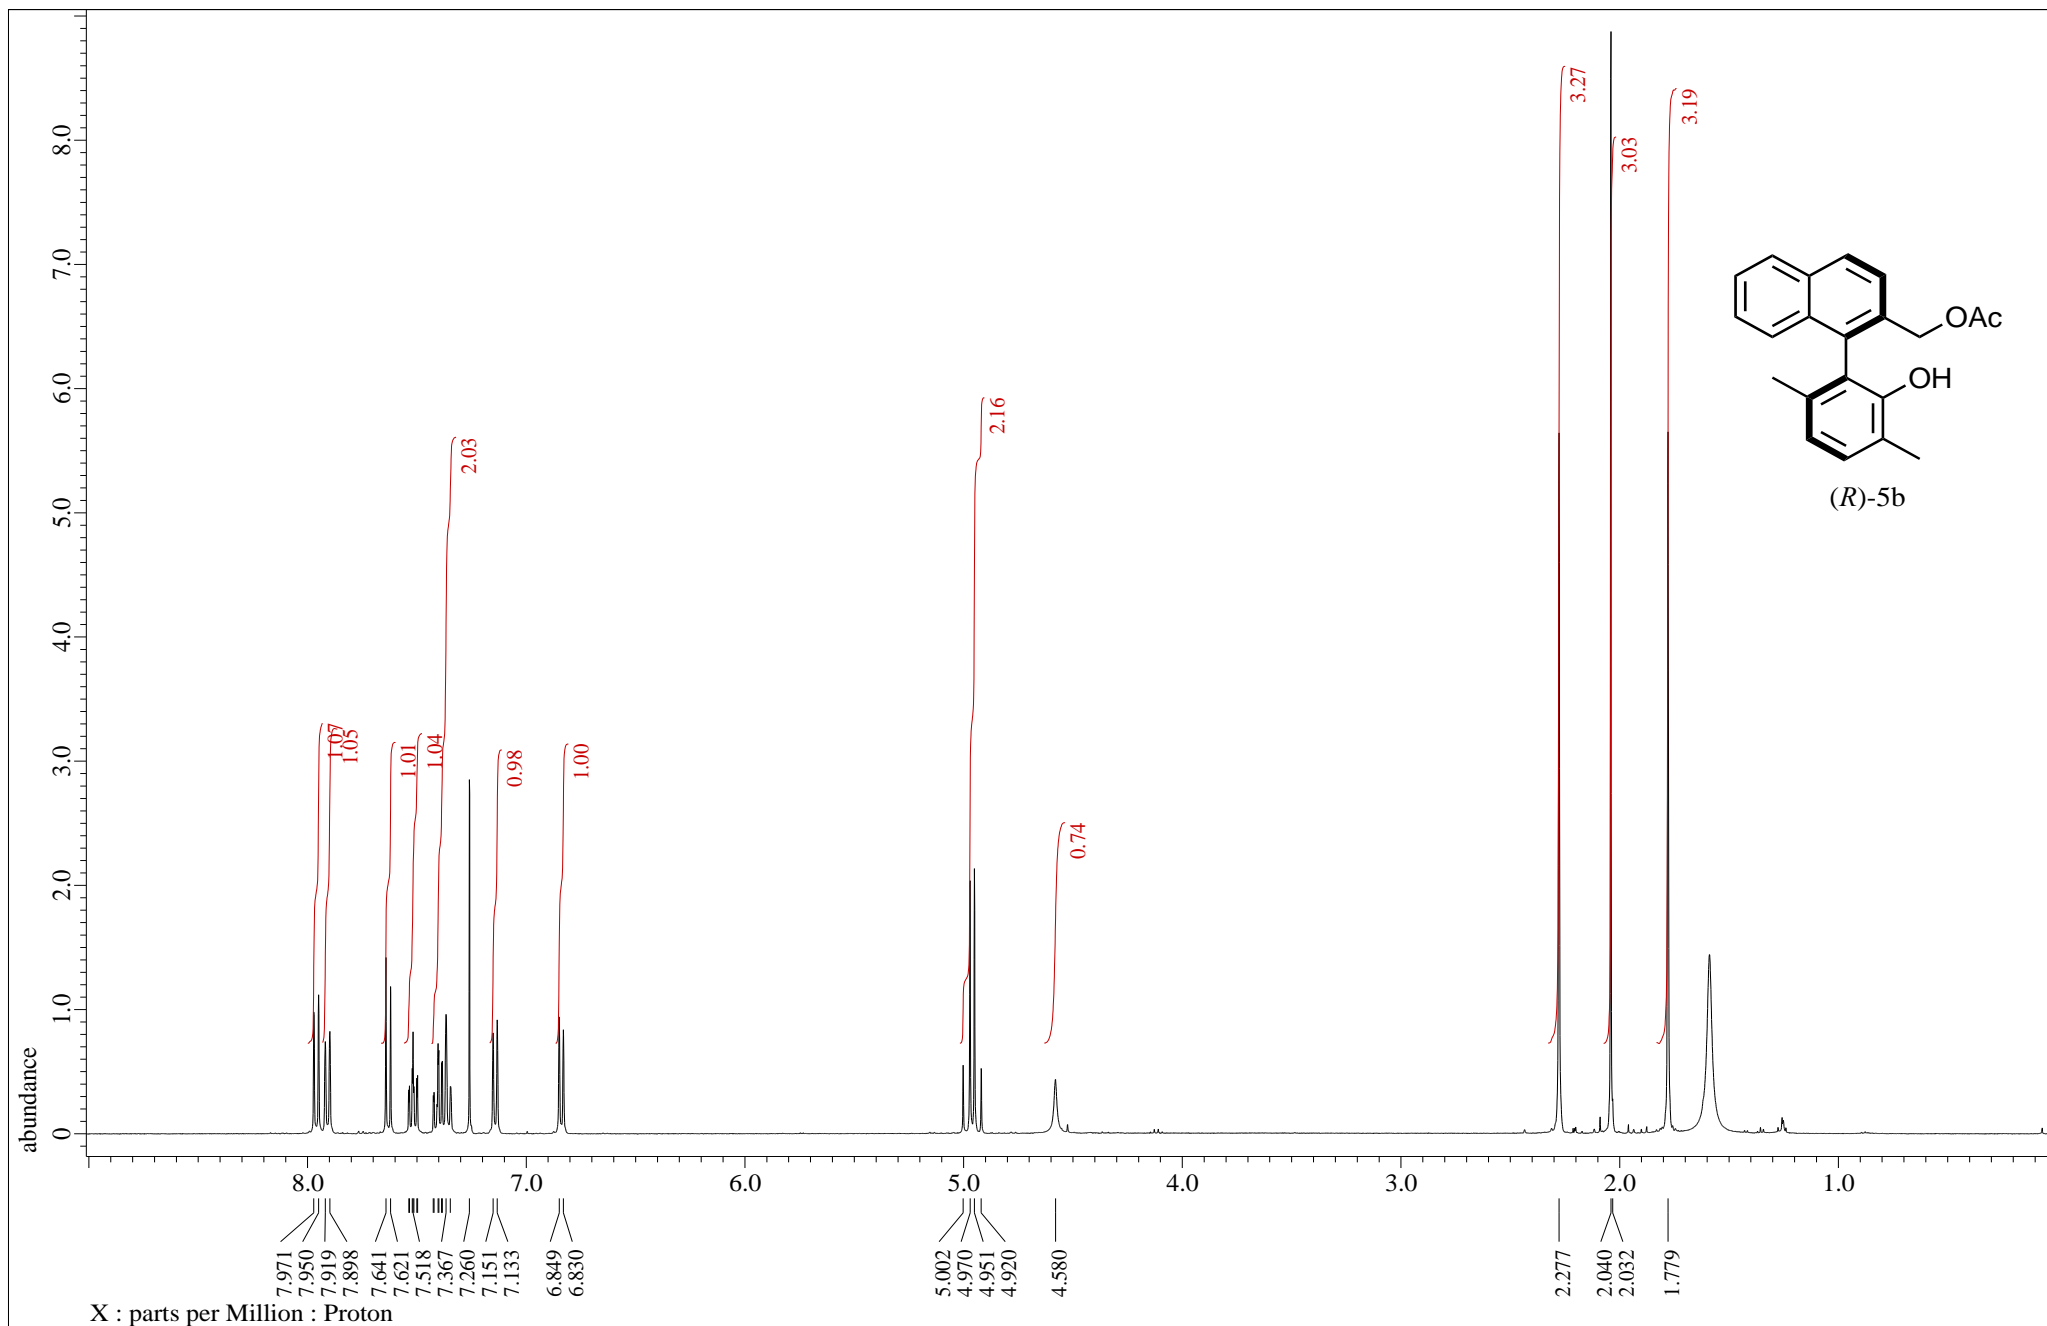

<sup>1</sup>H NMR spectrum (400 MHz, CDCl<sub>3</sub>) of *(R)*-5b

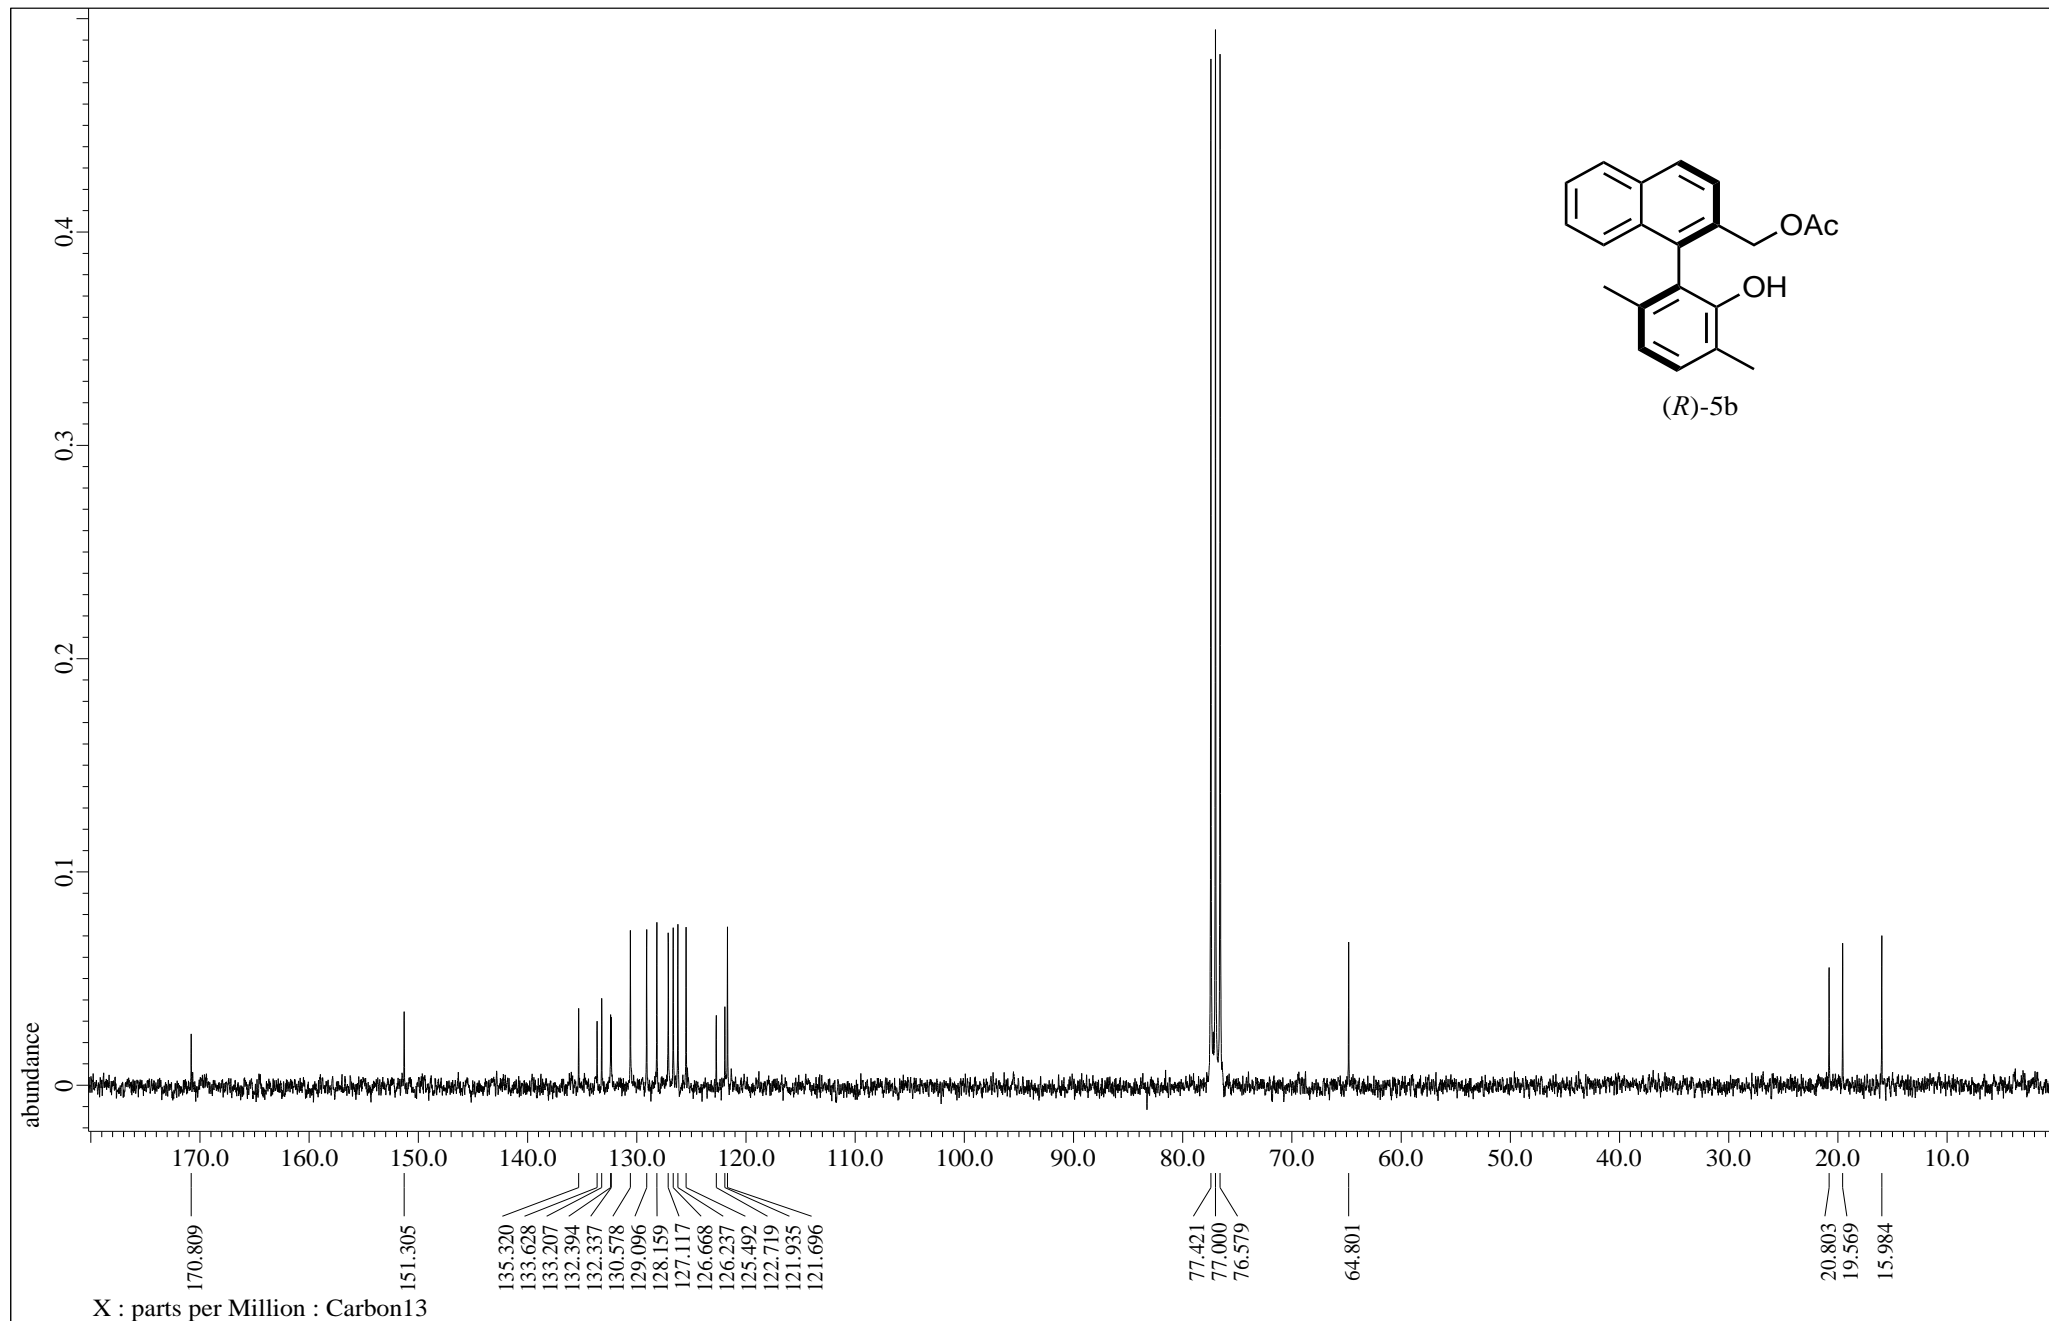

$^{13}\text{C}$  NMR spectrum (100 MHz,  $\text{CDCl}_3$ ) of (R)-5b

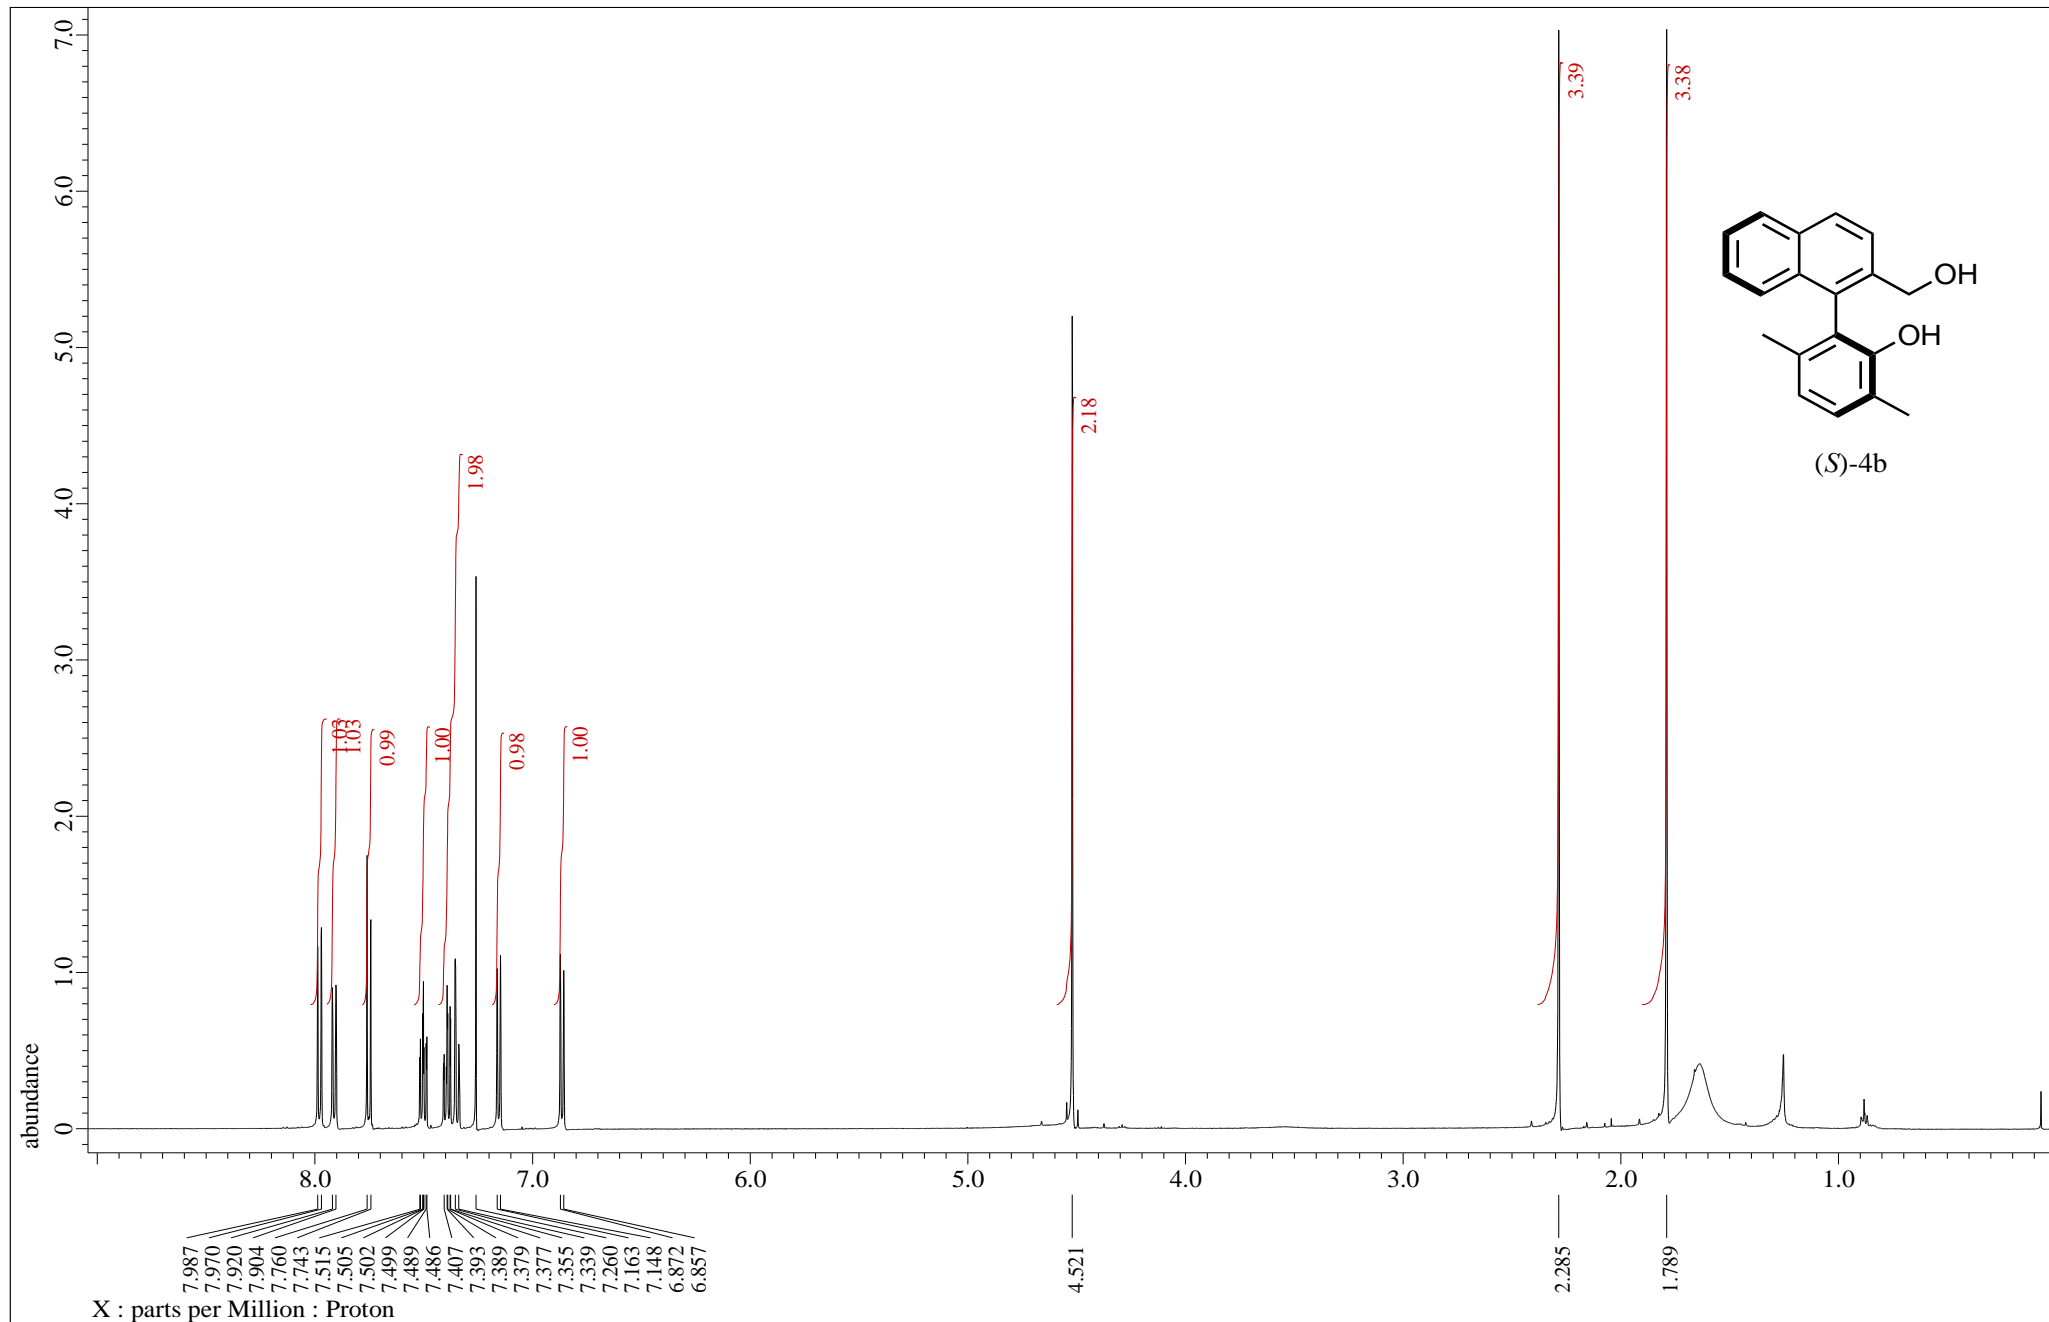

<sup>1</sup>H NMR spectrum (400 MHz, CDCl<sub>3</sub>) of (S)-4b



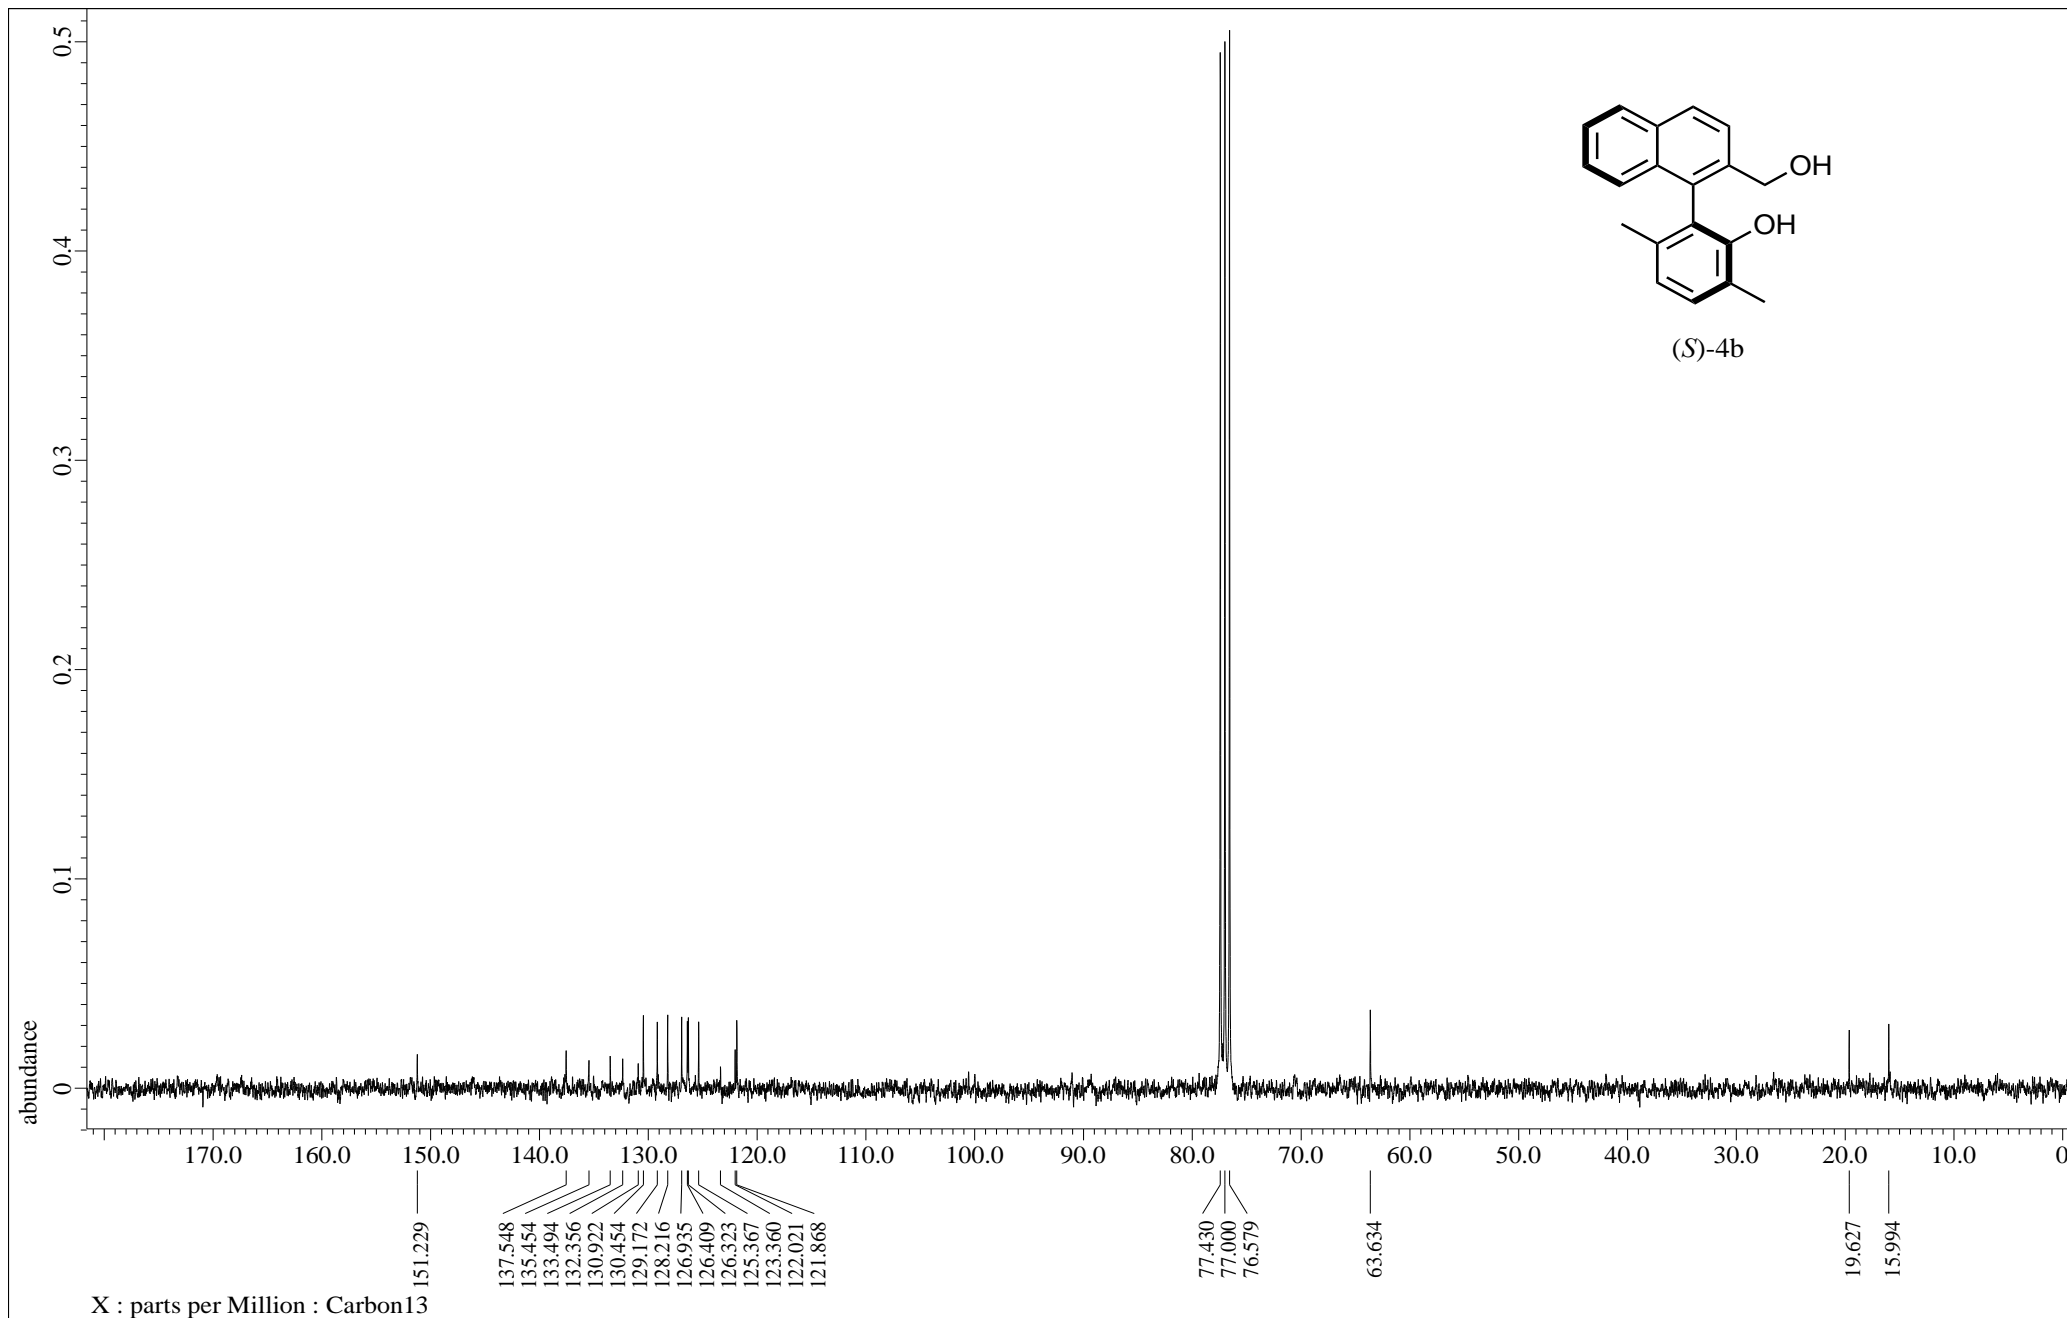

$^{13}\text{C}$  NMR spectrum (100 MHz,  $\text{CDCl}_3$ ) of (S)-4b

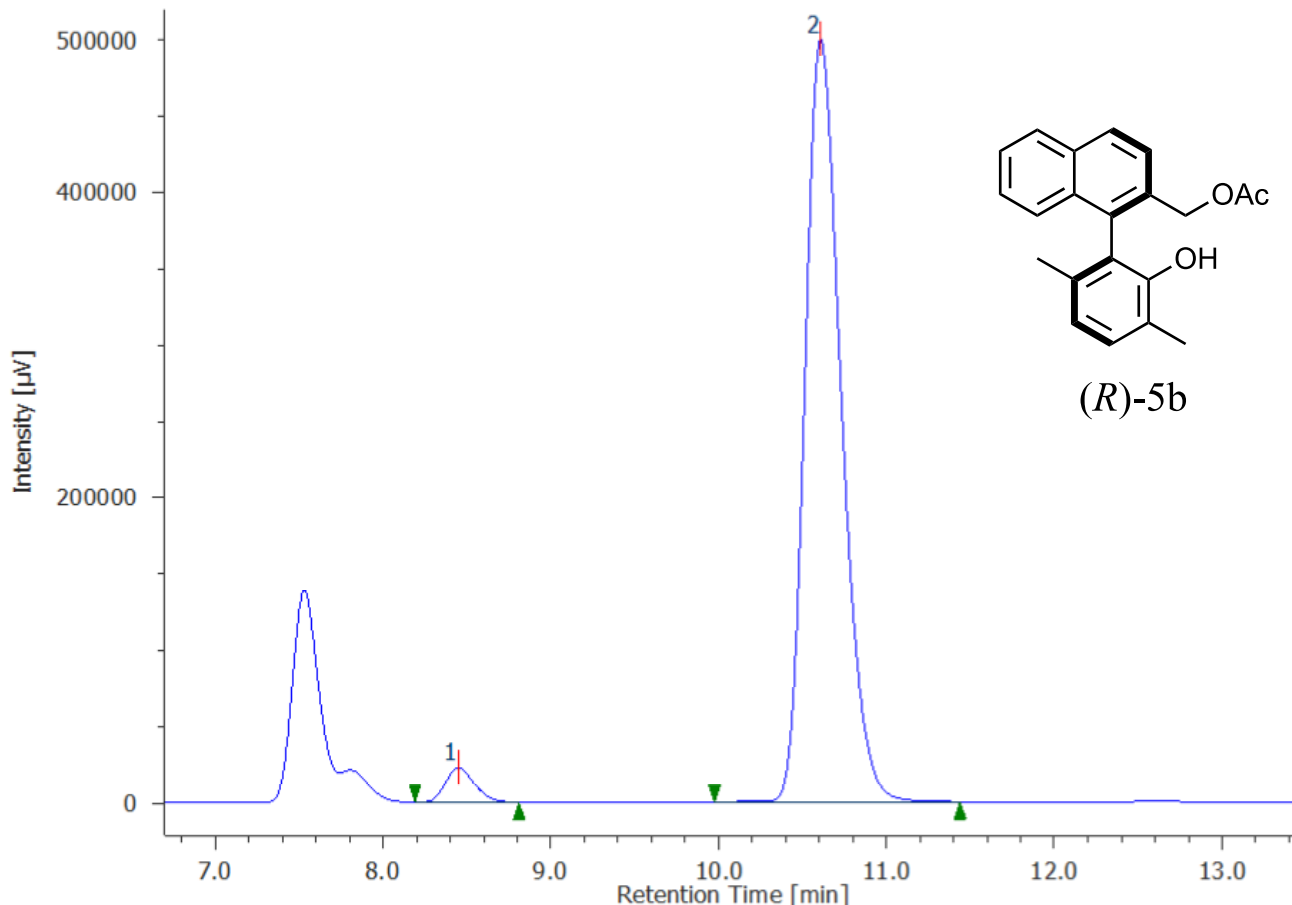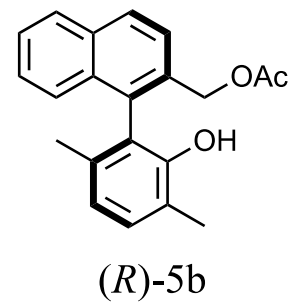

| # | ピーク名    | CH | tR [min] | 面積 [ $\mu\text{V}\cdot\text{sec}$ ] | 高さ [ $\mu\text{V}$ ] | 面積%    | 高さ%    | 定量値 | NTP   | 分離度   | シンメトリー係数 | 警告 |
|---|---------|----|----------|-------------------------------------|----------------------|--------|--------|-----|-------|-------|----------|----|
| 1 | Unknown | 9  | 8.447    | 276228                              | 22965                | 3.548  | 4.390  | N/A | 11512 | 6.132 | 1.230    |    |
| 2 | Unknown | 9  | 10.607   | 7509485                             | 500197               | 96.452 | 95.610 | N/A | 11744 | N/A   | 1.276    |    |

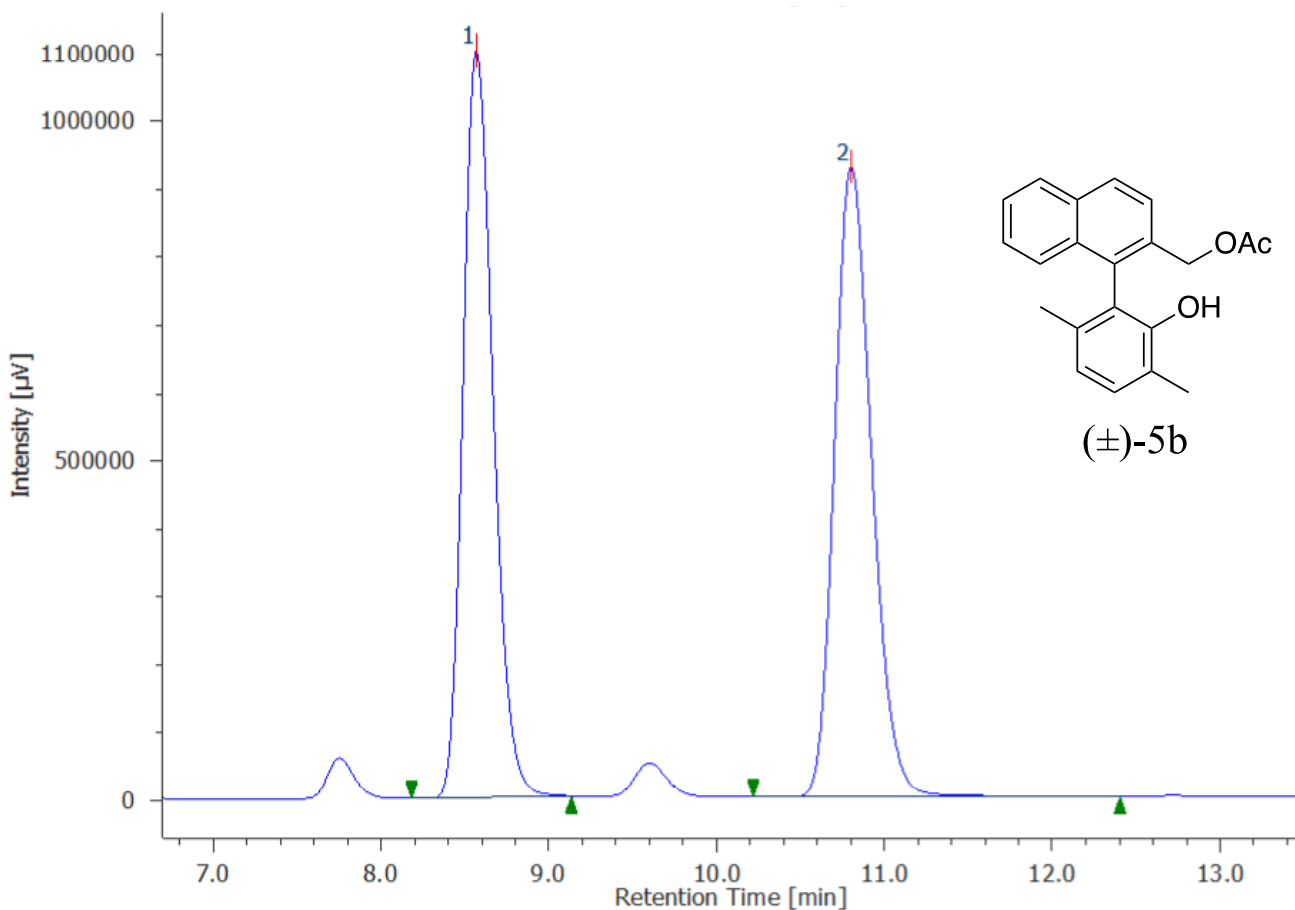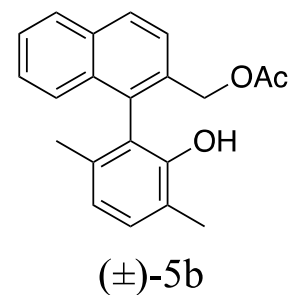

| # | ピーク名    | CH | tR [min] | 面積 [ $\mu\text{V}\cdot\text{sec}$ ] | 高さ [ $\mu\text{V}$ ] | 面積%    | 高さ%    | 定量値 | NTP   | 分離度   | シンメトリー係数 | 警告 |
|---|---------|----|----------|-------------------------------------|----------------------|--------|--------|-----|-------|-------|----------|----|
| 1 | Unknown | 9  | 8.567    | 13687664                            | 1099721              | 48.969 | 54.245 | N/A | 10985 | 6.140 | 1.227    |    |
| 2 | Unknown | 9  | 10.800   | 14264005                            | 927612               | 51.031 | 45.755 | N/A | 11519 | N/A   | 1.216    |    |

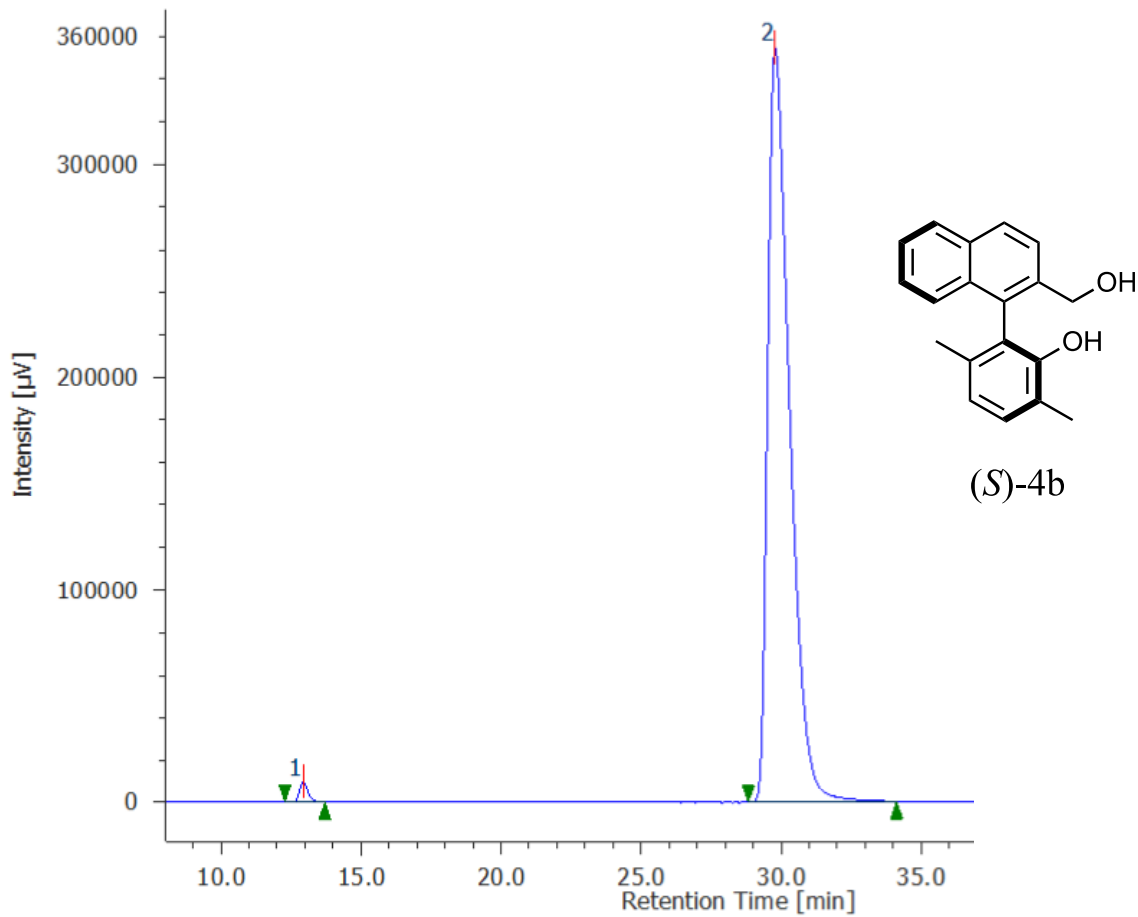

| # | ピーク名    | CH | tR [min] | 面積 [ $\mu\text{V}\cdot\text{sec}$ ] | 高さ [ $\mu\text{V}$ ] | 面積%    | 高さ%    | 定量値 | NTP  | 分離度    | シンメトリー係数 | 警告 |
|---|---------|----|----------|-------------------------------------|----------------------|--------|--------|-----|------|--------|----------|----|
| 1 | Unknown | 9  | 12.933   | 195818                              | 9737                 | 1.006  | 2.671  | N/A | 9922 | 17.513 | 1.271    |    |
| 2 | Unknown | 9  | 29.787   | 19263402                            | 354842               | 98.994 | 97.329 | N/A | 7136 | N/A    | 1.727    |    |

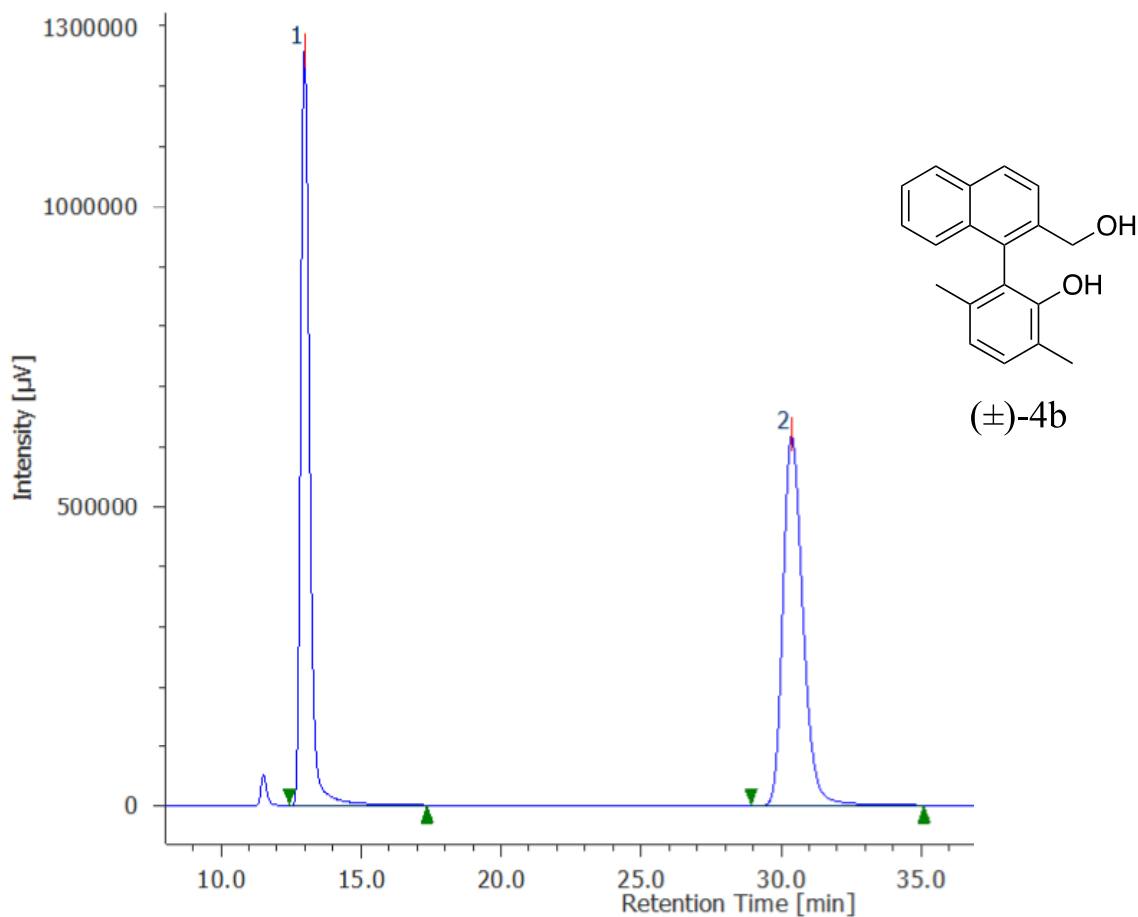

| # | ピーク名    | CH | tR [min] | 面積 [ $\mu\text{V}\cdot\text{sec}$ ] | 高さ [ $\mu\text{V}$ ] | 面積%    | 高さ%    | 定量値 | NTP  | 分離度    | シンメトリー係数 | 警告 |
|---|---------|----|----------|-------------------------------------|----------------------|--------|--------|-----|------|--------|----------|----|
| 1 | Unknown | 9  | 12.980   | 28267262                            | 1258238              | 47.991 | 67.105 | N/A | 8505 | 18.938 | 1.316    |    |
| 2 | Unknown | 9  | 30.373   | 30633675                            | 616782               | 52.009 | 32.895 | N/A | 9026 | N/A    | 1.260    |    |
